# Supplementary material for: Heterobimetallic μ2-carbido complexes of platinum and tungsten
Source: Royal Society of Chemistry journal article supplement (doi:10.1039/d0dt01617a), 2020-01-01
Supplement: d0dt01617a1.pdf [file d0dt01617a1.pdf]

SUPPORTING INFORMATION

## Heterobimetallic $\mu_2$ -carbido Complexes of Platinum and Tungsten

Liam K. Burt<sup>a</sup> and Anthony F. Hill<sup>a,\*</sup>

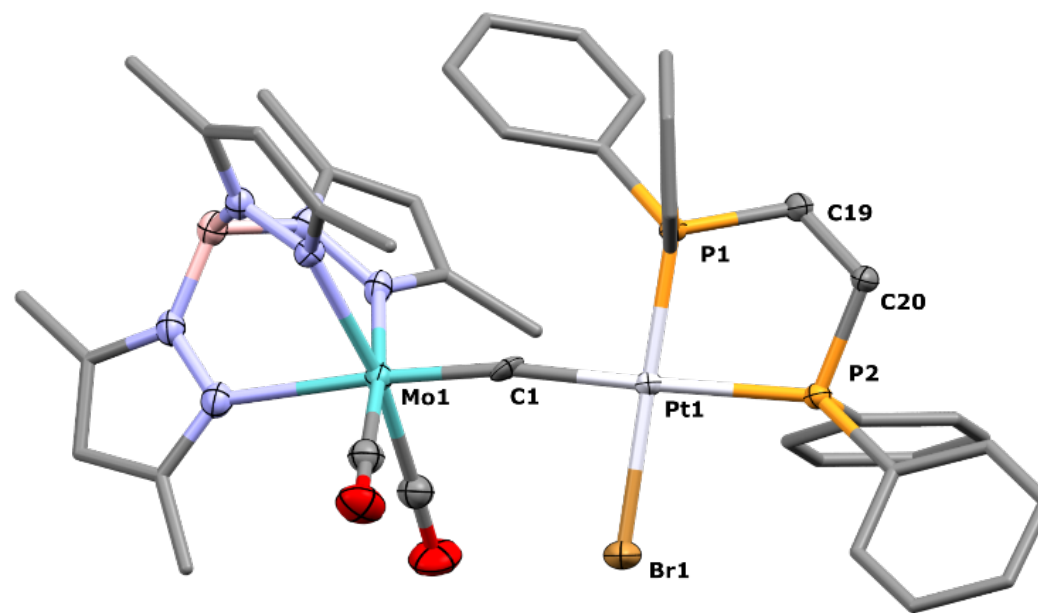

**Figure S1.** Molecular geometry of **6** in a crystal (50% displacement ellipsoids, hydrogen atoms removed, phenyl and pyrazolylidene groups simplified for clarity). Selected bond lengths (Å), angles (°) and torsions (°): Mo1–C1 1.818(6), C1–Pt1 1.980(6), Mo1–C1–Pt1 167.9(3), Pt1–Br1 2.4734(7), Pt1–P1 2.121(1), Pt1–P2 2.342(1) P1–Pt1–P2 85.61(5), P1–C19–C20–P2 51.6(4).

# SUPPORTING INFORMATION

Figure S2:  $^1\text{H}$  NMR Spectrum of (8)  $[(\text{Tp}^*)(\text{CO})_2\text{W}=\text{C}-\text{Pt}(\text{terpy})][\text{PF}_6]$  (400 MHz,  $\text{CD}_3\text{CN}$ , 25  $^\circ\text{C}$ ,  $\delta$ ):

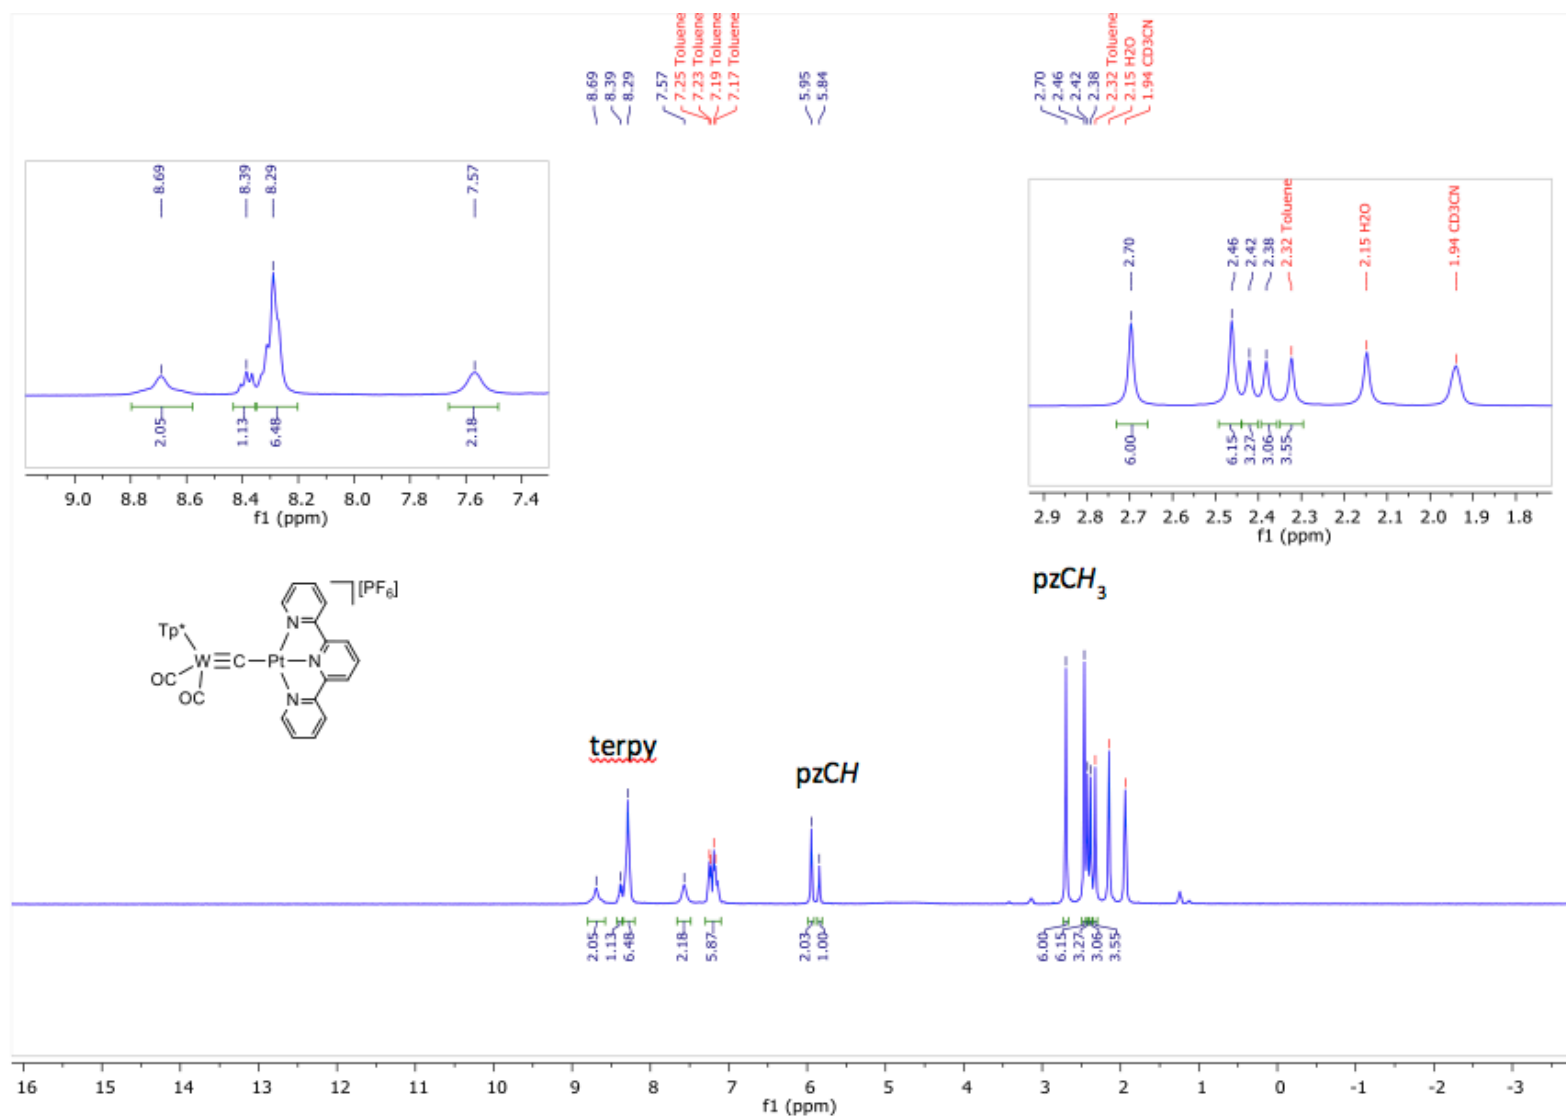

Figure S3:  $^{13}\text{C}\{^1\text{H}\}$  NMR Spectrum of (8)  $[(\text{Tp}^*)(\text{CO})_2\text{W}\equiv\text{C}-\text{Pt}(\text{terpy})][\text{PF}_6]$  (151 MHz,  $\text{CD}_3\text{CN}$ , 25 °C,  $\delta$ ):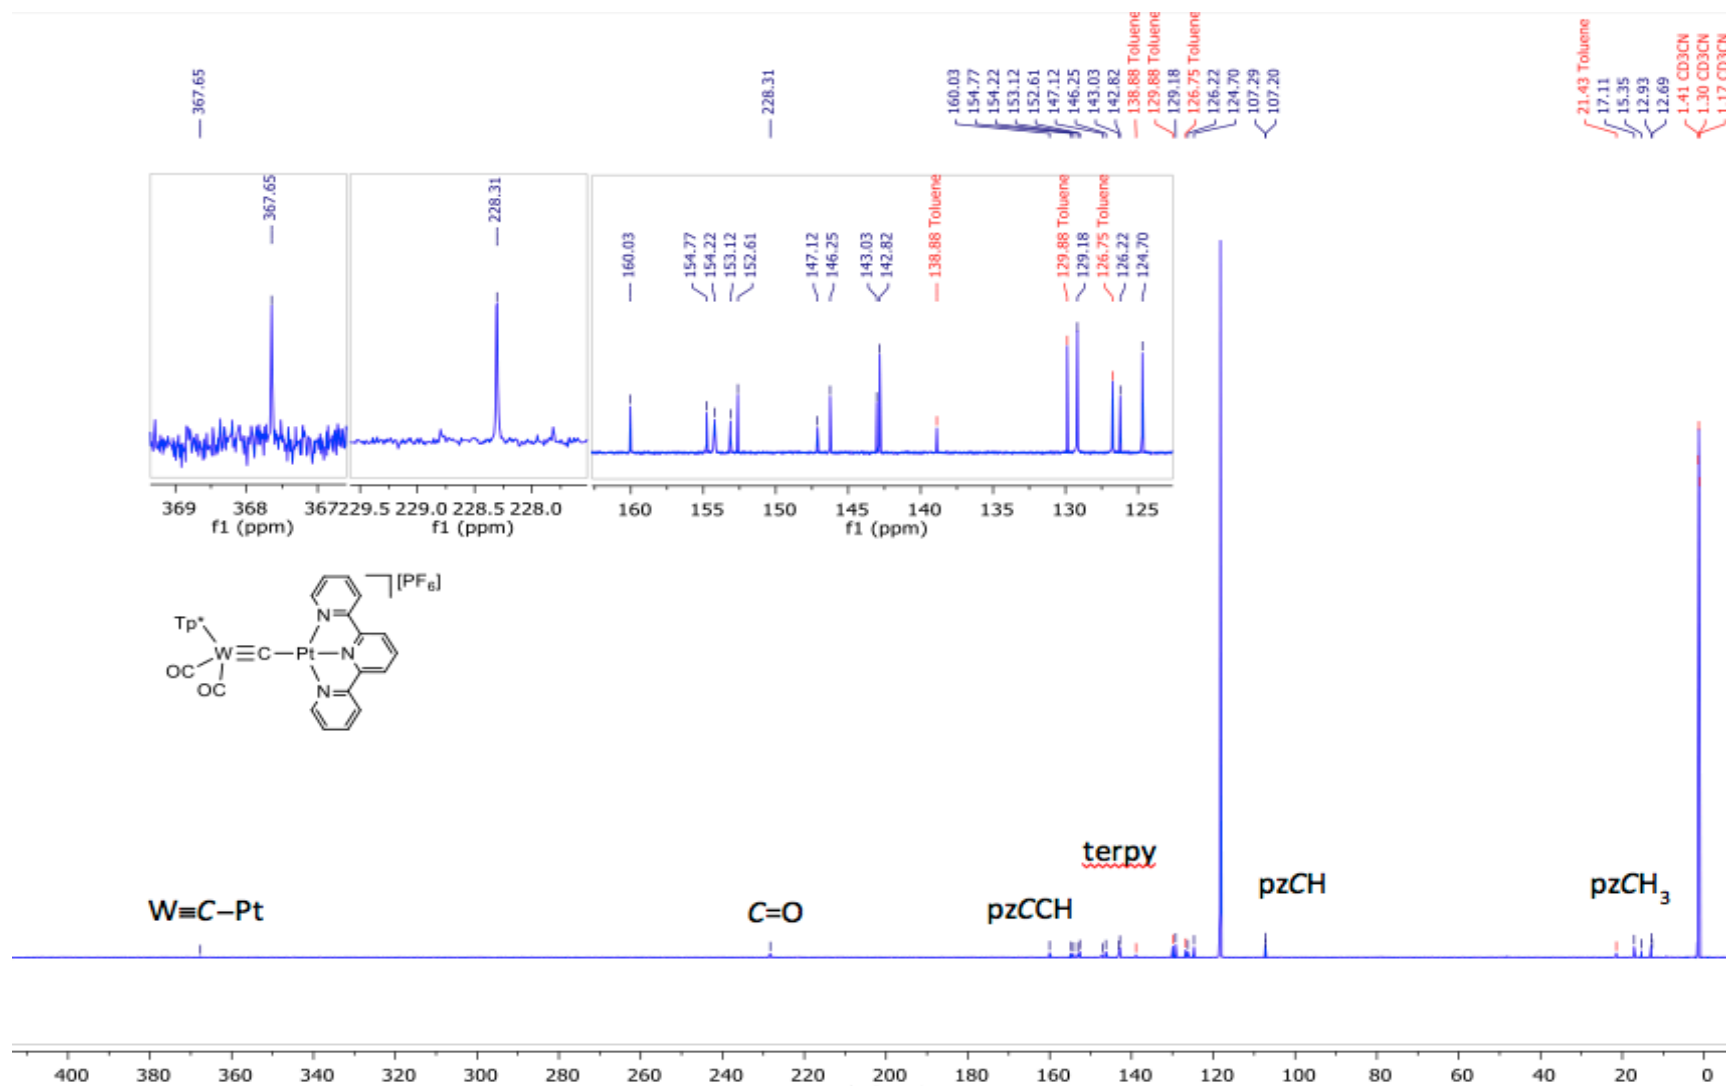

**Figure S4:**  $^{119}\text{F}\{^1\text{H}\}$  NMR Spectrum of (8)  $[(\text{Tp}^*)(\text{CO})_2\text{W}\equiv\text{C}-\text{Pt}(\text{terpy})][\text{PF}_6]$  (376 MHz,  $\text{CD}_3\text{CN}$ , 25 °C,  $\delta$ ):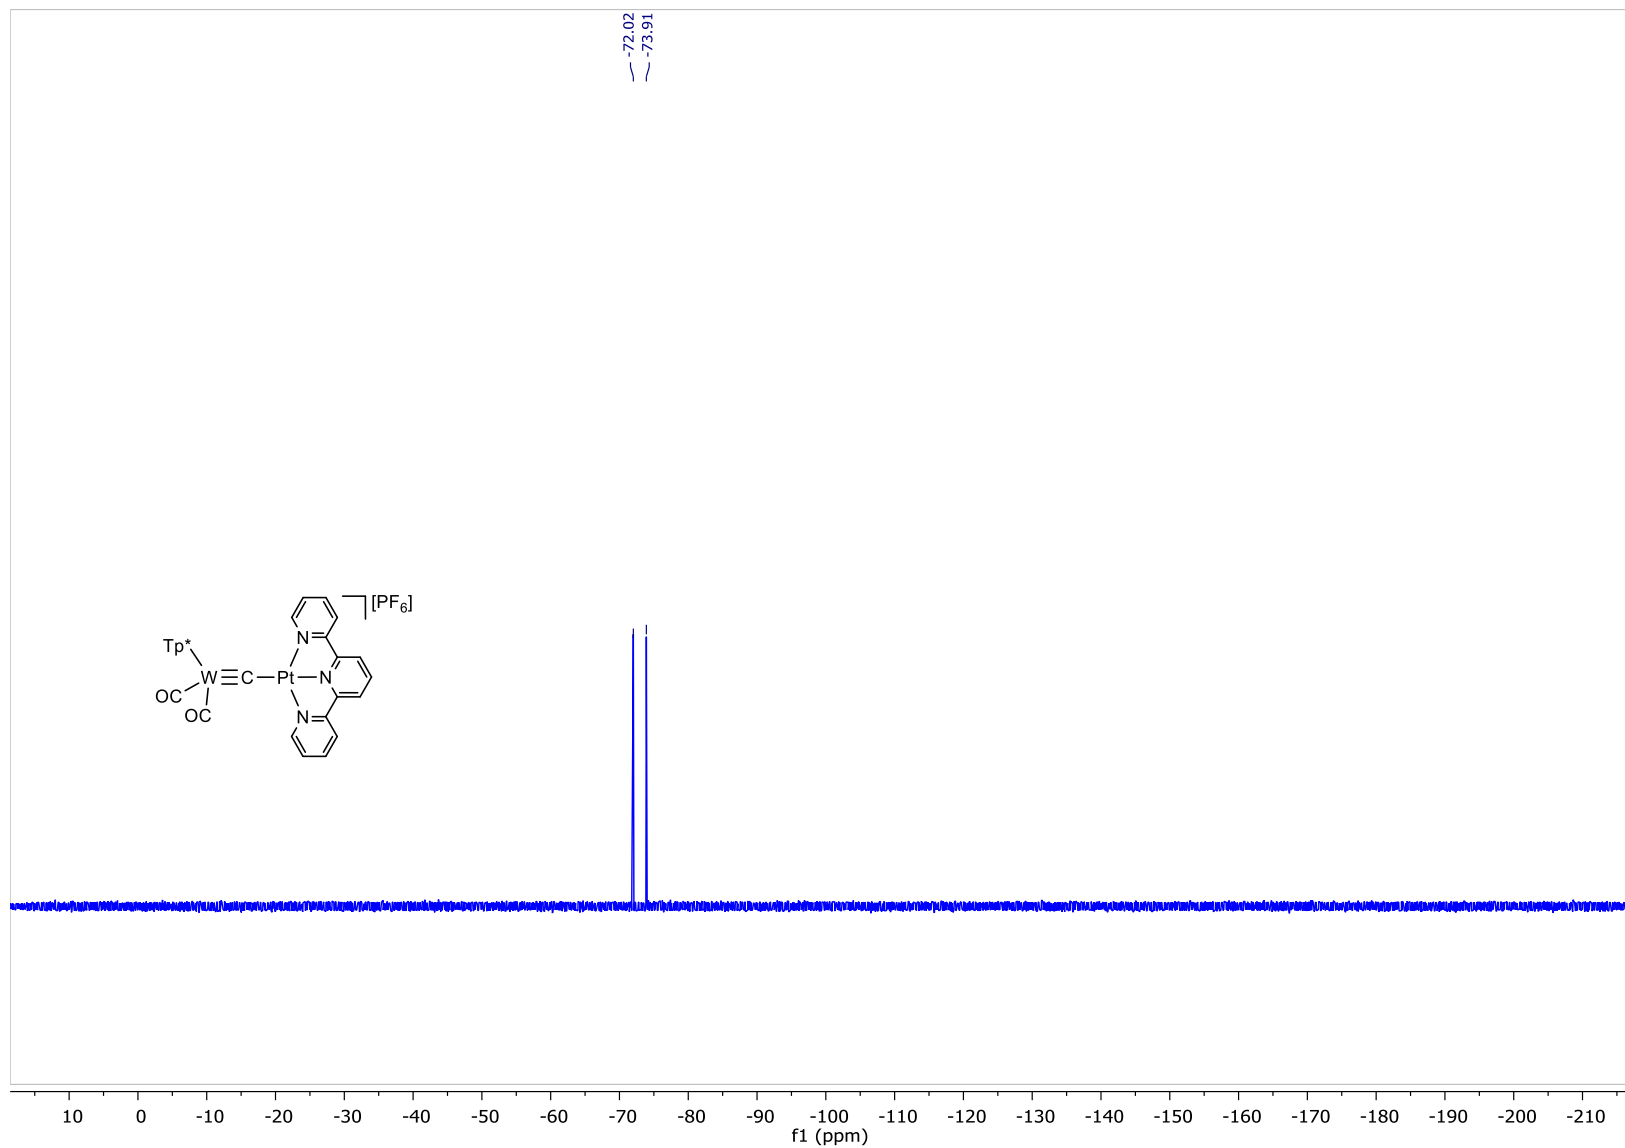

Figure S5:  $^{131}\text{P}\{^1\text{H}\}$  NMR Spectrum of (5)  $[(\text{Tp}^*)(\text{CO})_2\text{W}\equiv\text{C}-\text{Pt}(\text{terpy})][\text{PF}_6]$  (162 MHz,  $\text{CD}_3\text{CN}$ , 25 °C,  $\delta$ ):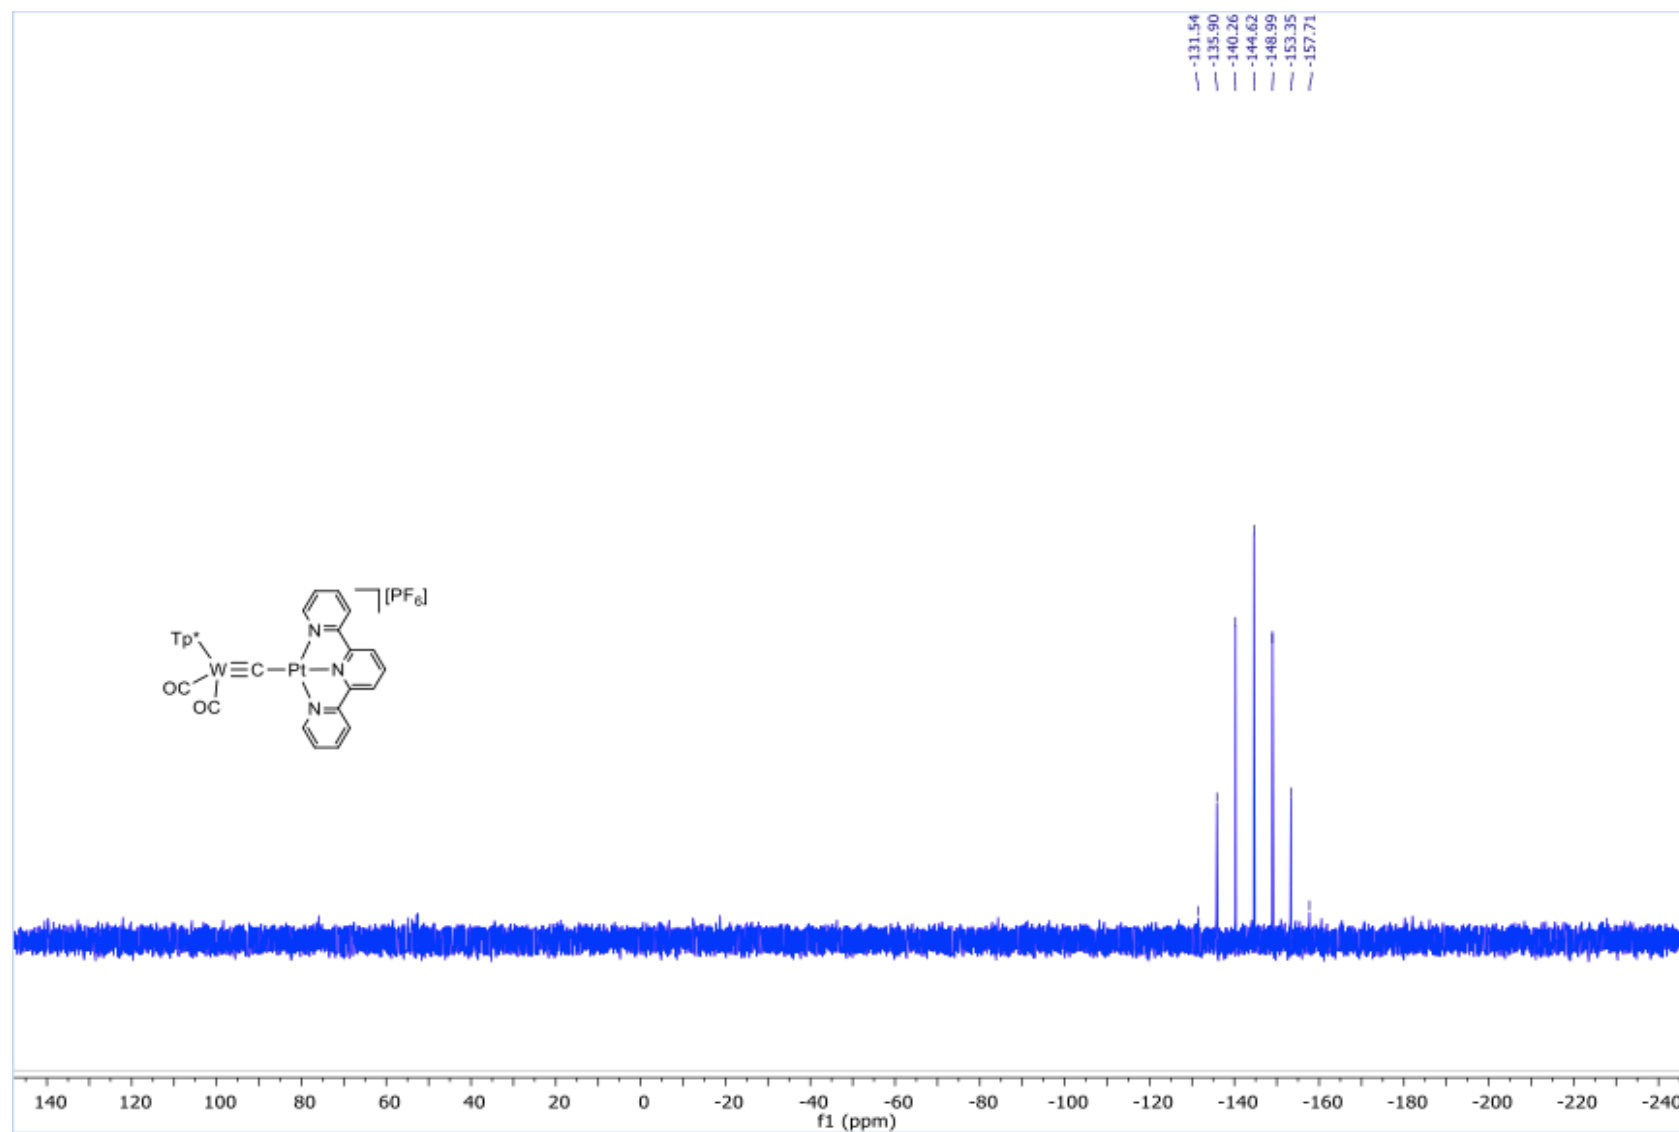

Figure S6:  $^1\text{H}$  NMR Spectrum of (6)  $[(\text{Tp}^*)(\text{CO})_2\text{Mo}\equiv\text{C}-\text{PtBr}(\text{dppe})]$  (400 MHz,  $\text{CDCl}_3$ , 25  $^\circ\text{C}$ ,  $\delta$ ):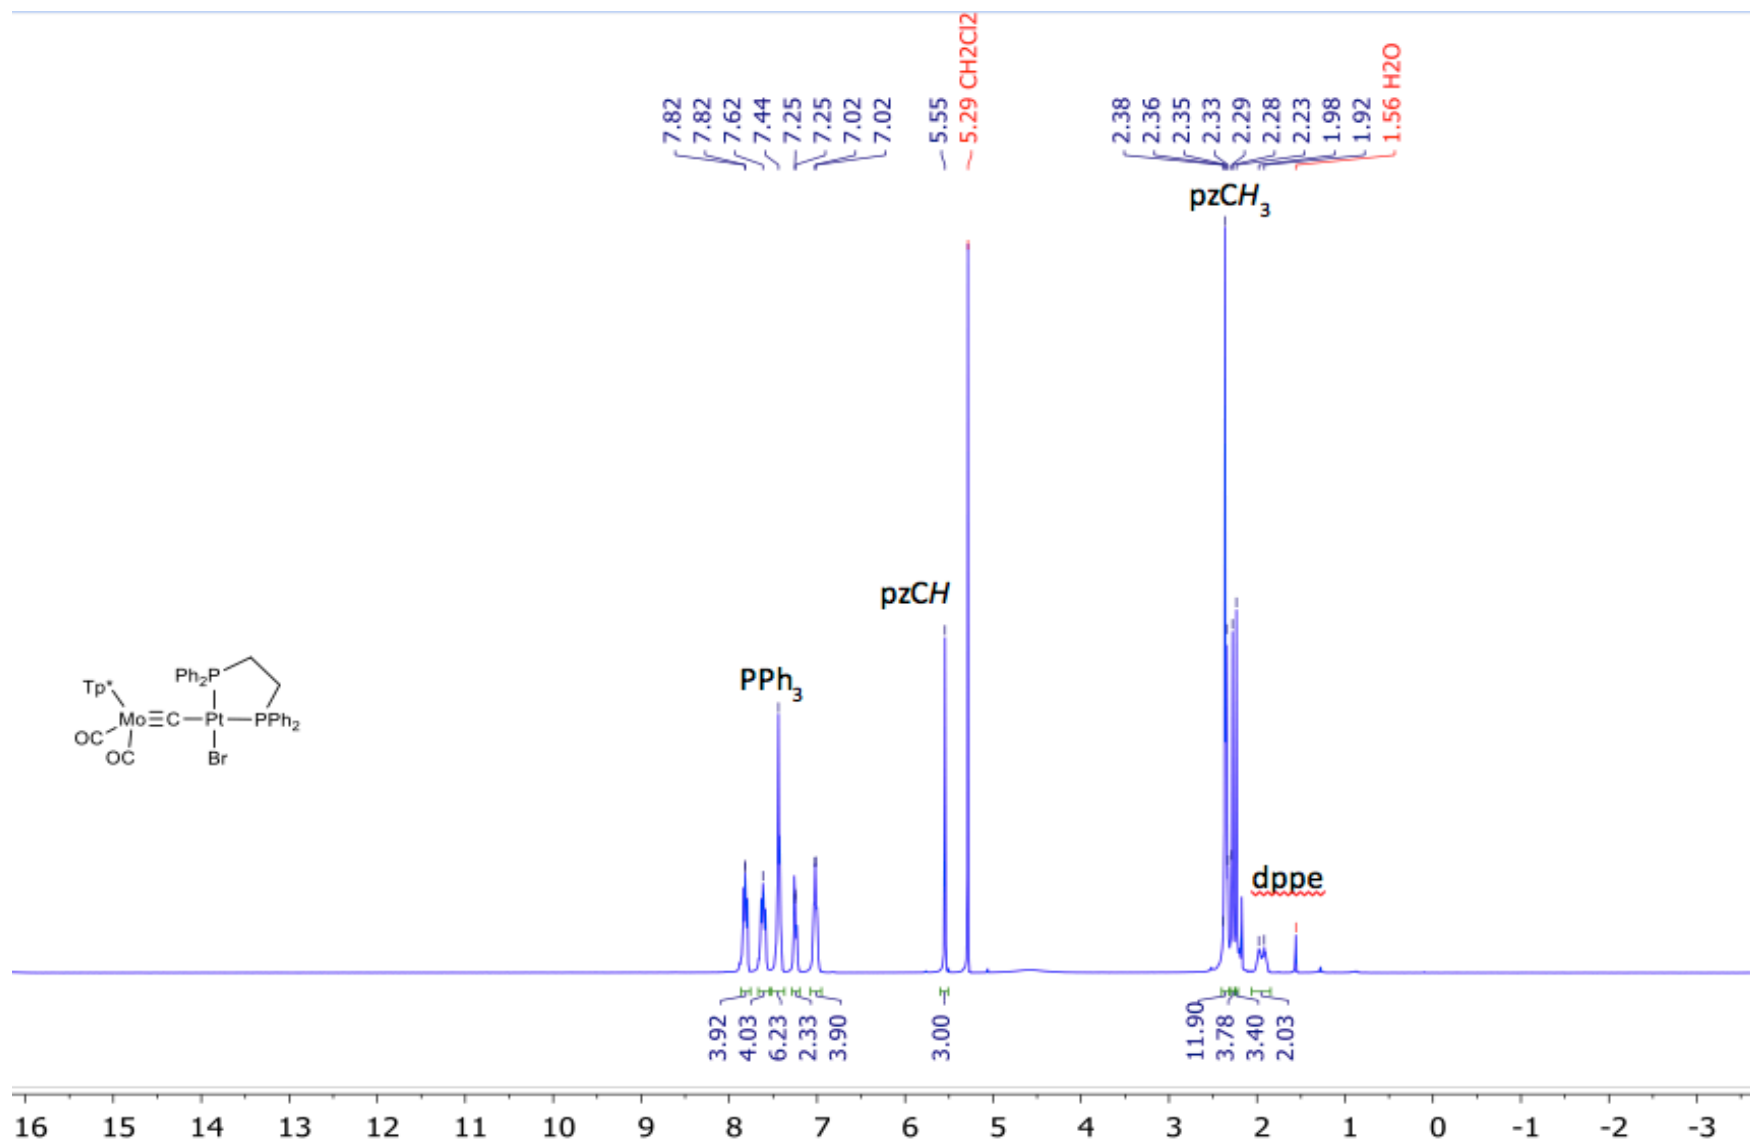

Figure S7:  $^{13}\text{C}\{^1\text{H}\}$  NMR Spectrum of (6)  $[(\text{Tp}^*)(\text{CO})_2\text{Mo}\equiv\text{C}-\text{PtBr}(\text{PPh}_3)_2]$  (151 MHz,  $\text{CD}_2\text{Cl}_2$ , 25 °C,  $\delta$ ):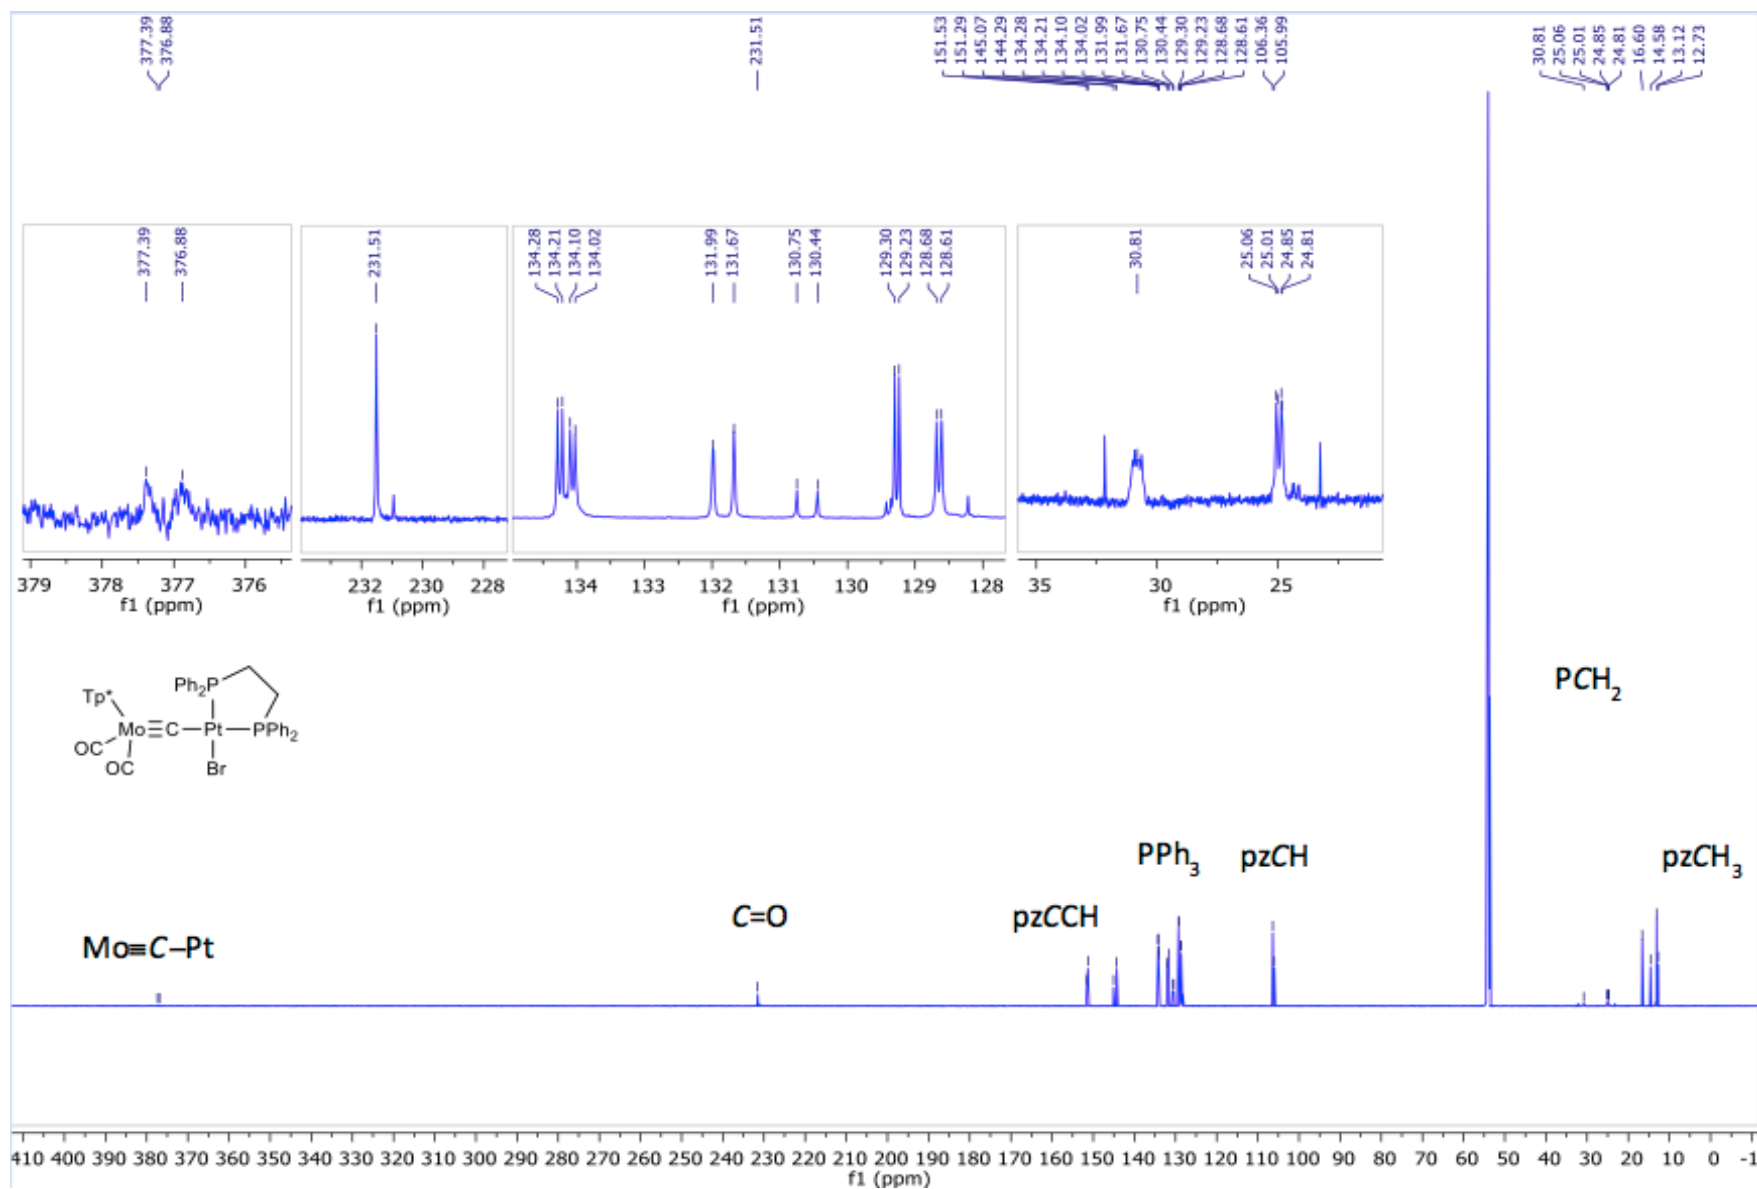

Figure S8:  $^{131}\text{P}\{^1\text{H}\}$  NMR Spectrum of (6)  $[(\text{Tp}^*)(\text{CO})_2\text{Mo}\equiv\text{C}-\text{PtBr}(\text{dppe})]$  (162 MHz,  $\text{CDCl}_3$ , 25 °C,  $\delta$ ):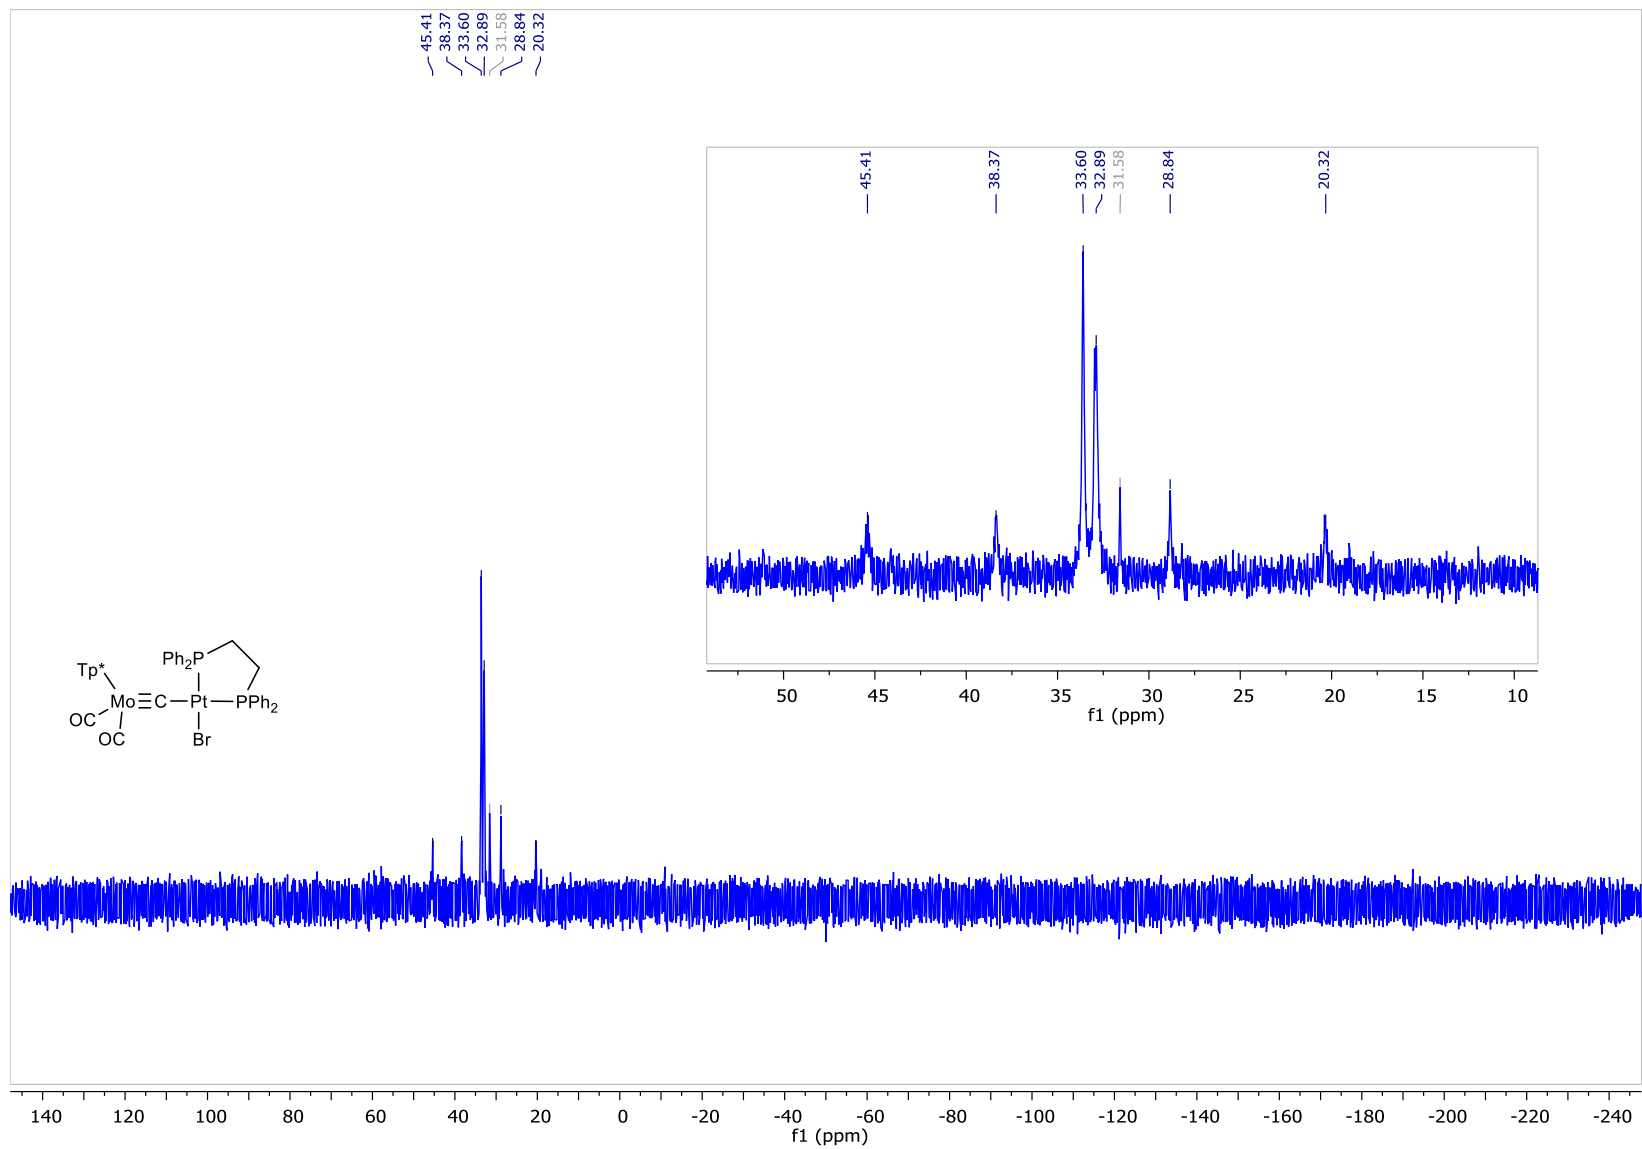



Figure S9:  $^1$ Infrared Spectrum of (6)  $[(Tp^*)(CO)_2Mo\equiv C-PtBr(PPh_3)_2]$  ( $CH_2Cl_2$ , 25 °C, v):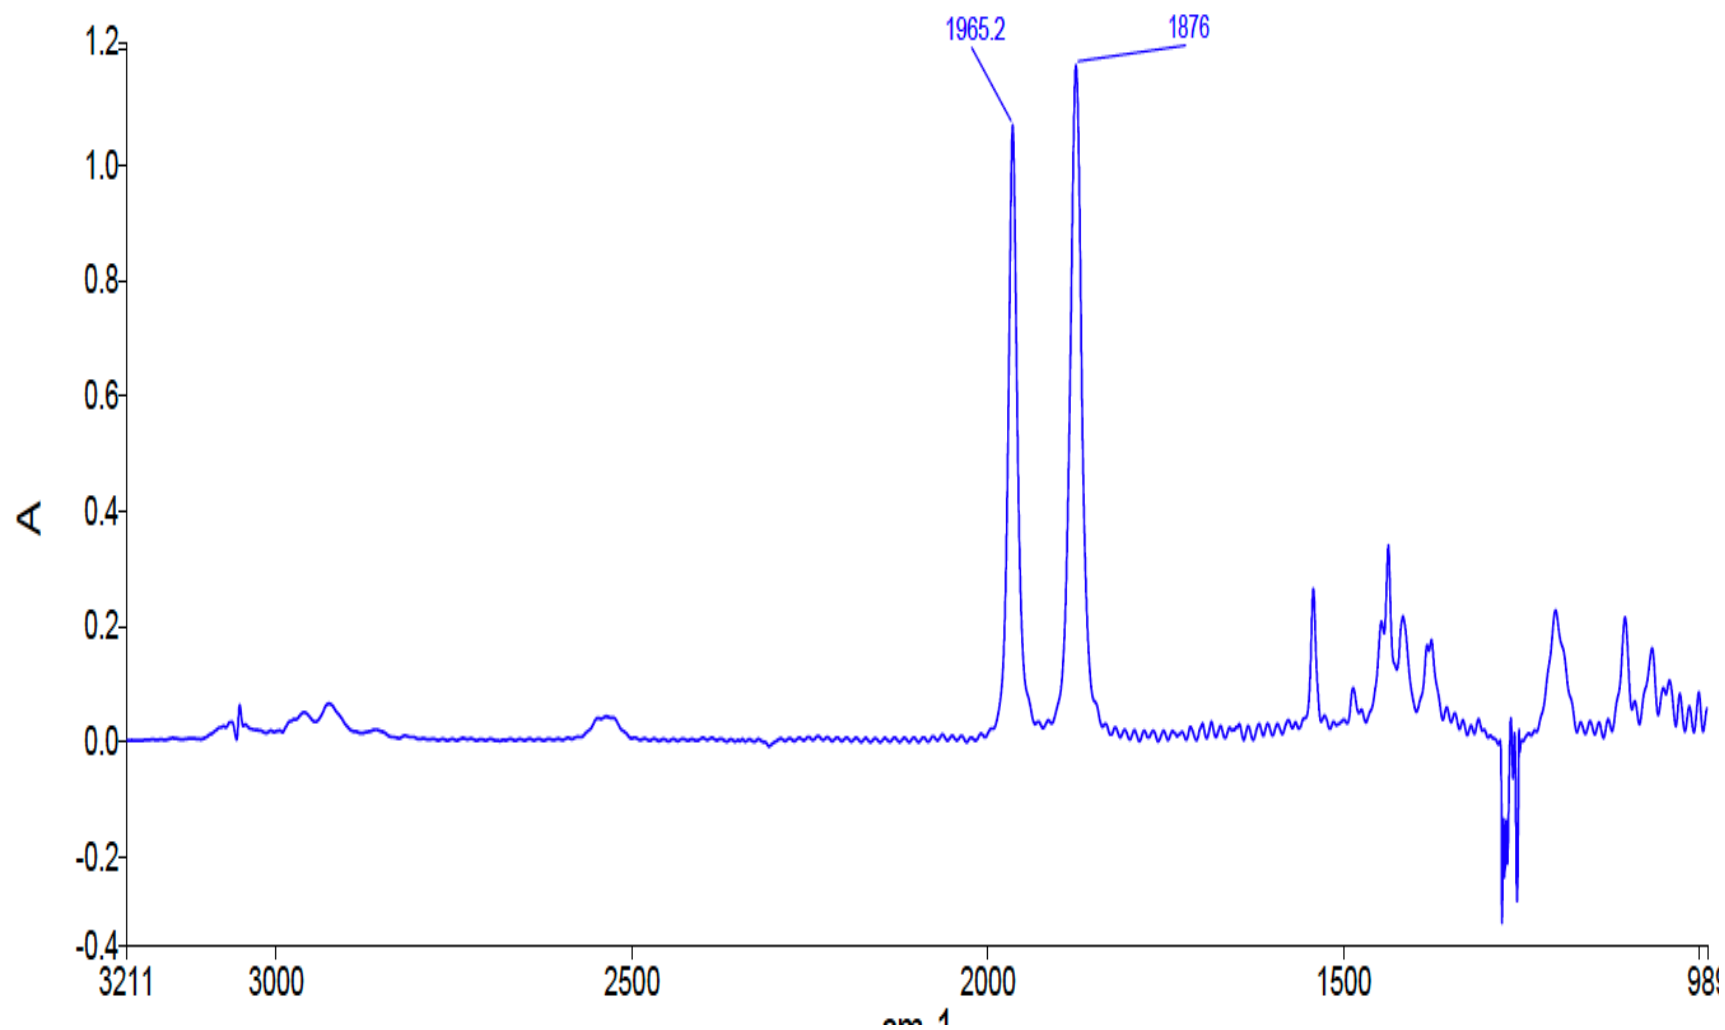

Figure S10:  $^1$ Mass Spectrum of (6)  $[(\text{Tp}^*)(\text{CO})_2\text{Mo}\equiv\text{C}-\text{PtBr}(\text{PPh}_3)_2]$  (ESI):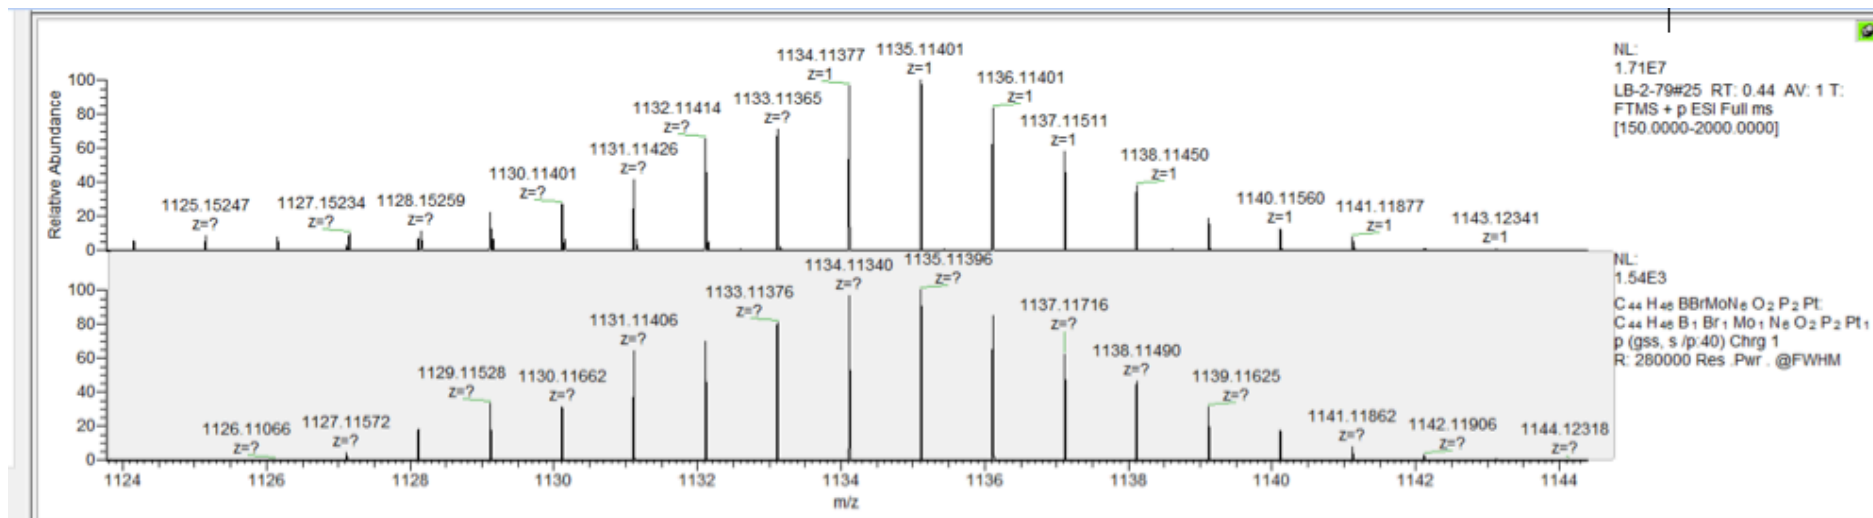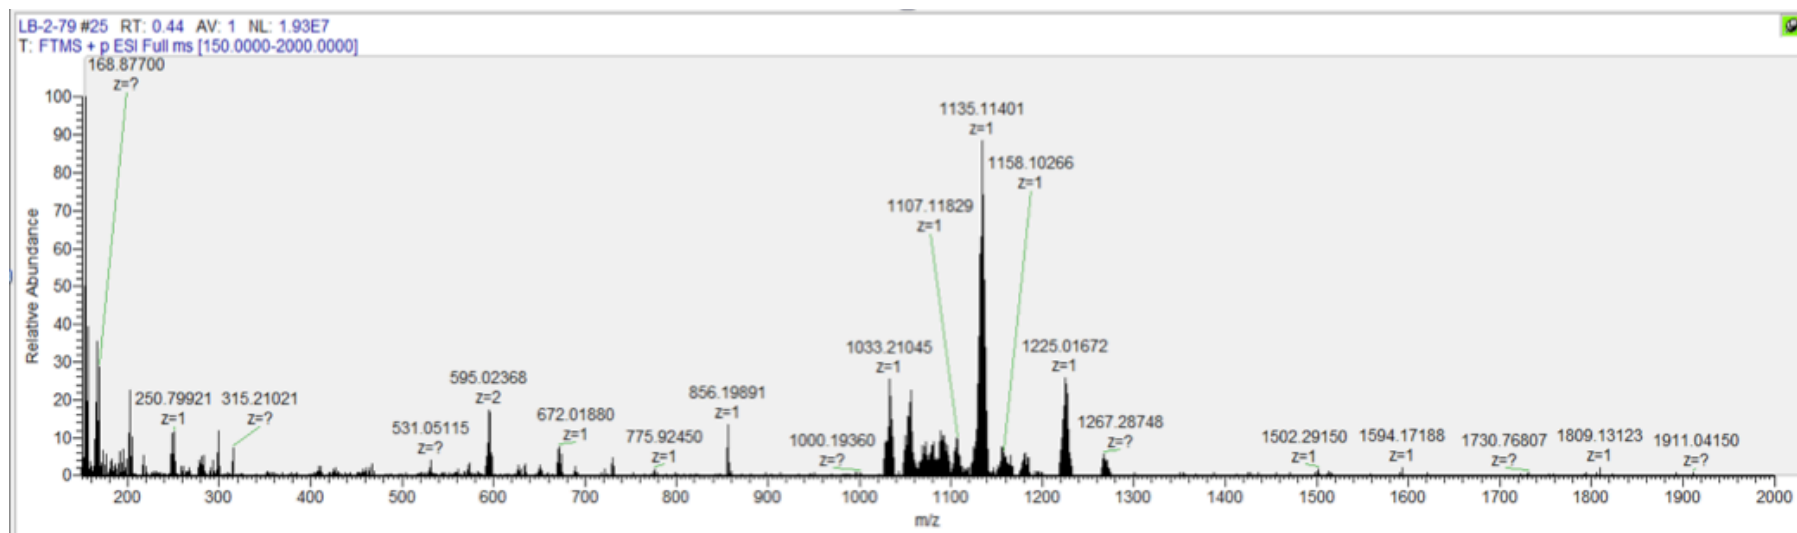

Figure S11:  $^1\text{H}$  NMR Spectrum of (5)  $[(\text{Tp}^*)(\text{CO})_2\text{W}\equiv\text{C}-\text{PtBr}(\text{dppe})]$  (400 MHz,  $\text{CDCl}_3$ , 25  $^\circ\text{C}$ ,  $\delta$ ):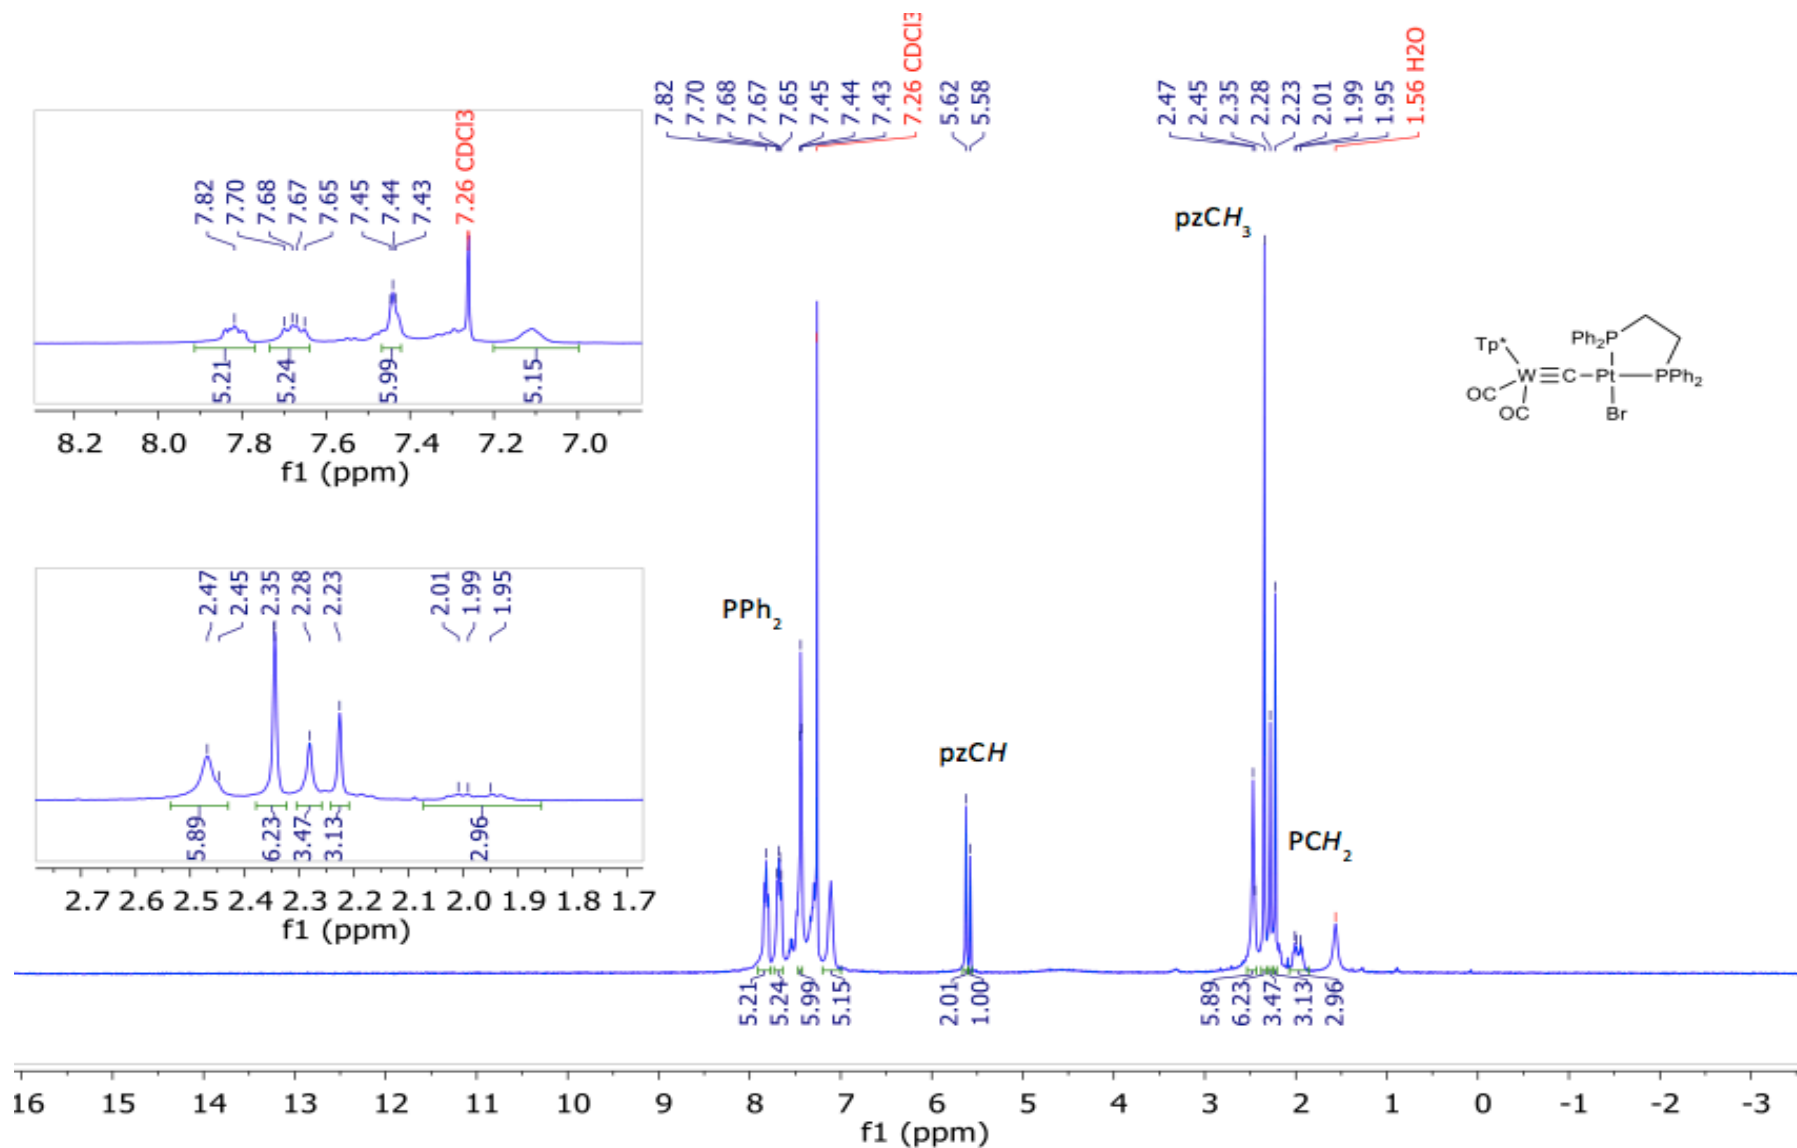

Figure S12:  $^{13}\text{C}\{^1\text{H}\}$  NMR Spectrum (5)  $[(\text{Tp}^*)(\text{CO})_2\text{W}=\text{C}-\text{PtBr}(\text{dppe})]$  (151 MHz,  $\text{CDCl}_3$ , 25 °C,  $\delta$ ):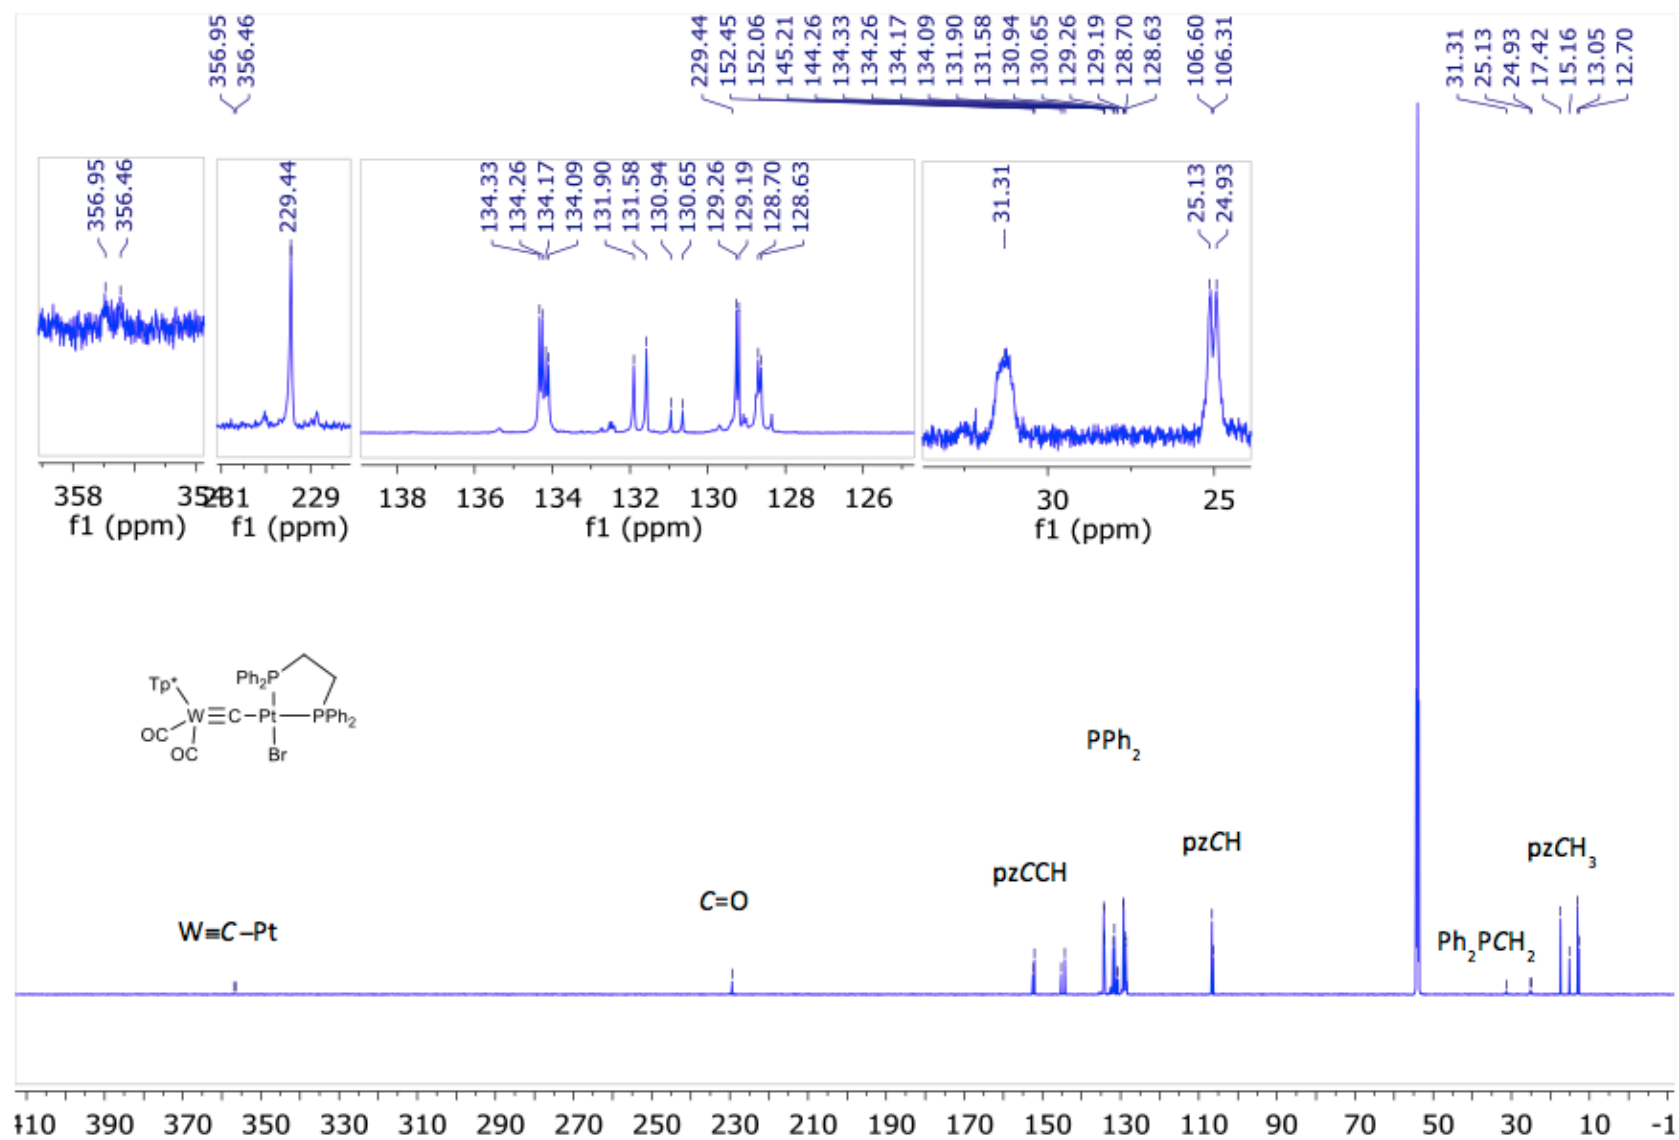

Figure S13:  $^{31}\text{P}\{^1\text{H}\}$  NMR Spectrum (5)  $[(\text{Tp}^*)(\text{CO})_2\text{W}\equiv\text{C}-\text{PtBr}(\text{dppe})]$  (284 MHz,  $\text{CD}_2\text{Cl}_2$ ,  $-40^\circ\text{C}$ ,  $\delta$ ):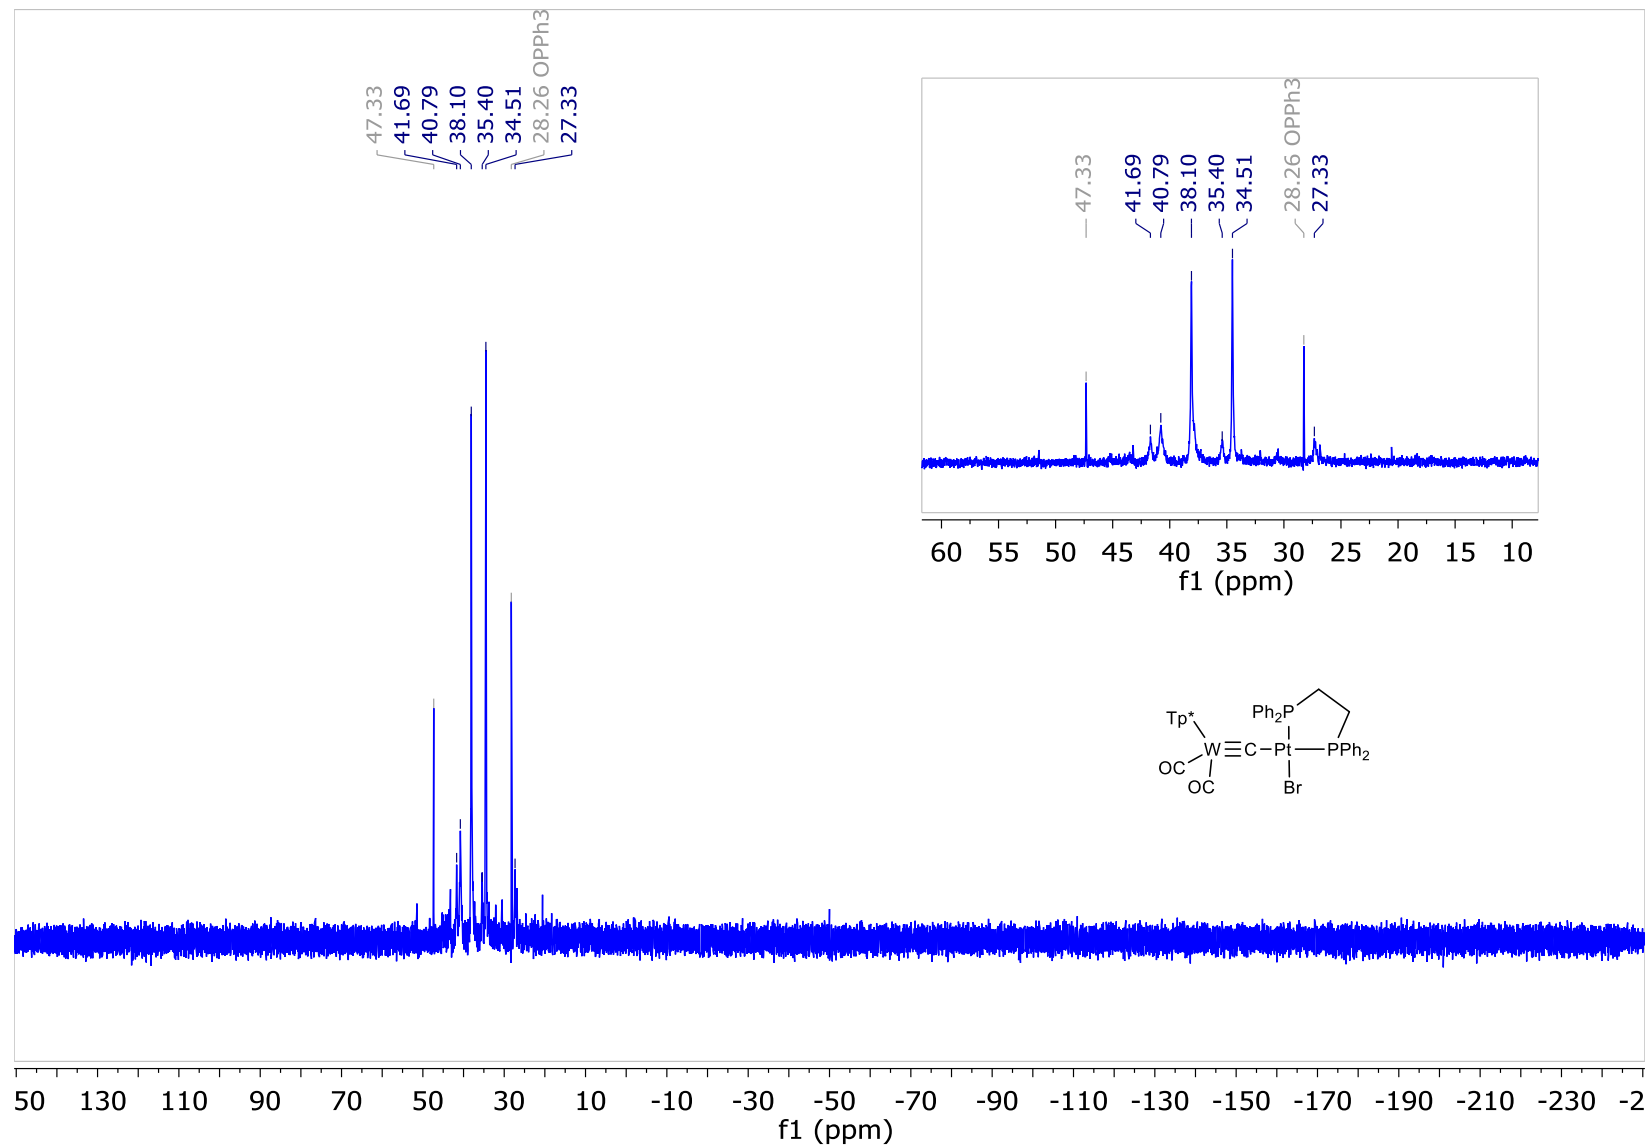

Figure S14: <sup>1</sup>Infrared Spectrum (5) [(Tp\*)(CO)<sub>2</sub>W≡C–PtBr(dppe)] (CH<sub>2</sub>Cl<sub>2</sub>, 25 °C, ν):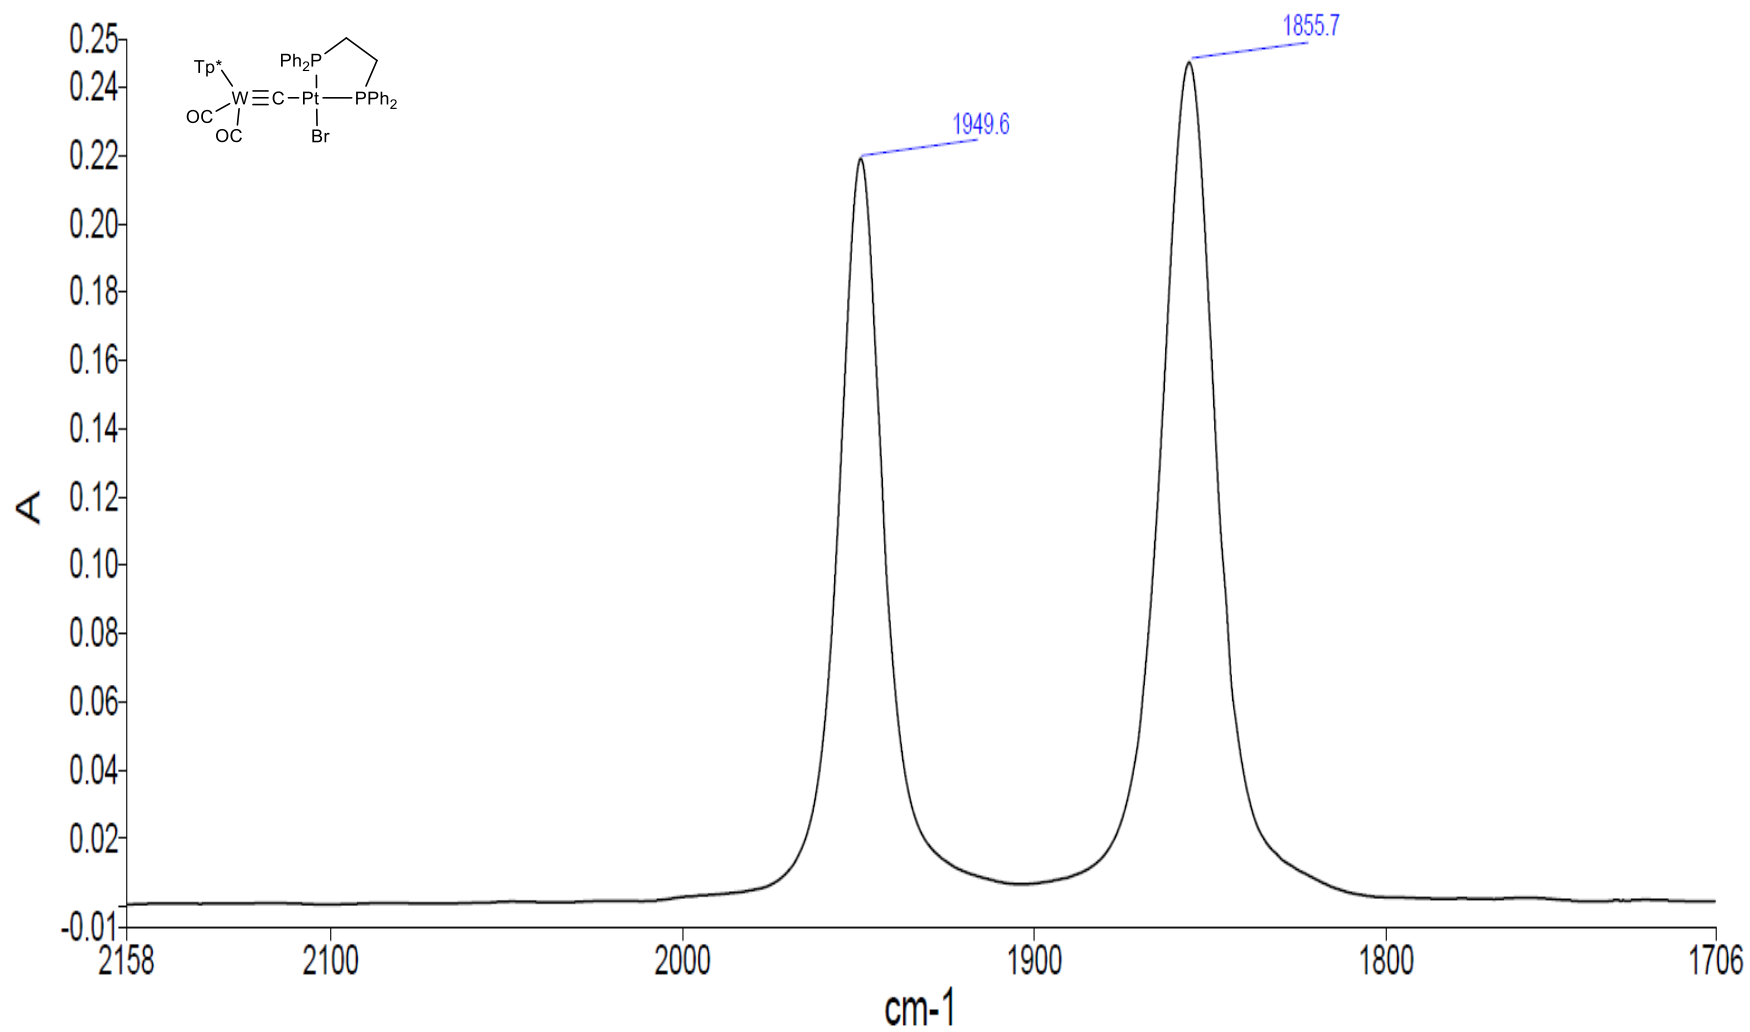

Figure S15: Mass Spectrum of (5)  $[(Tp^*)W(CO)_2](\mu-C)-PtBr(dppe)$  (ESI):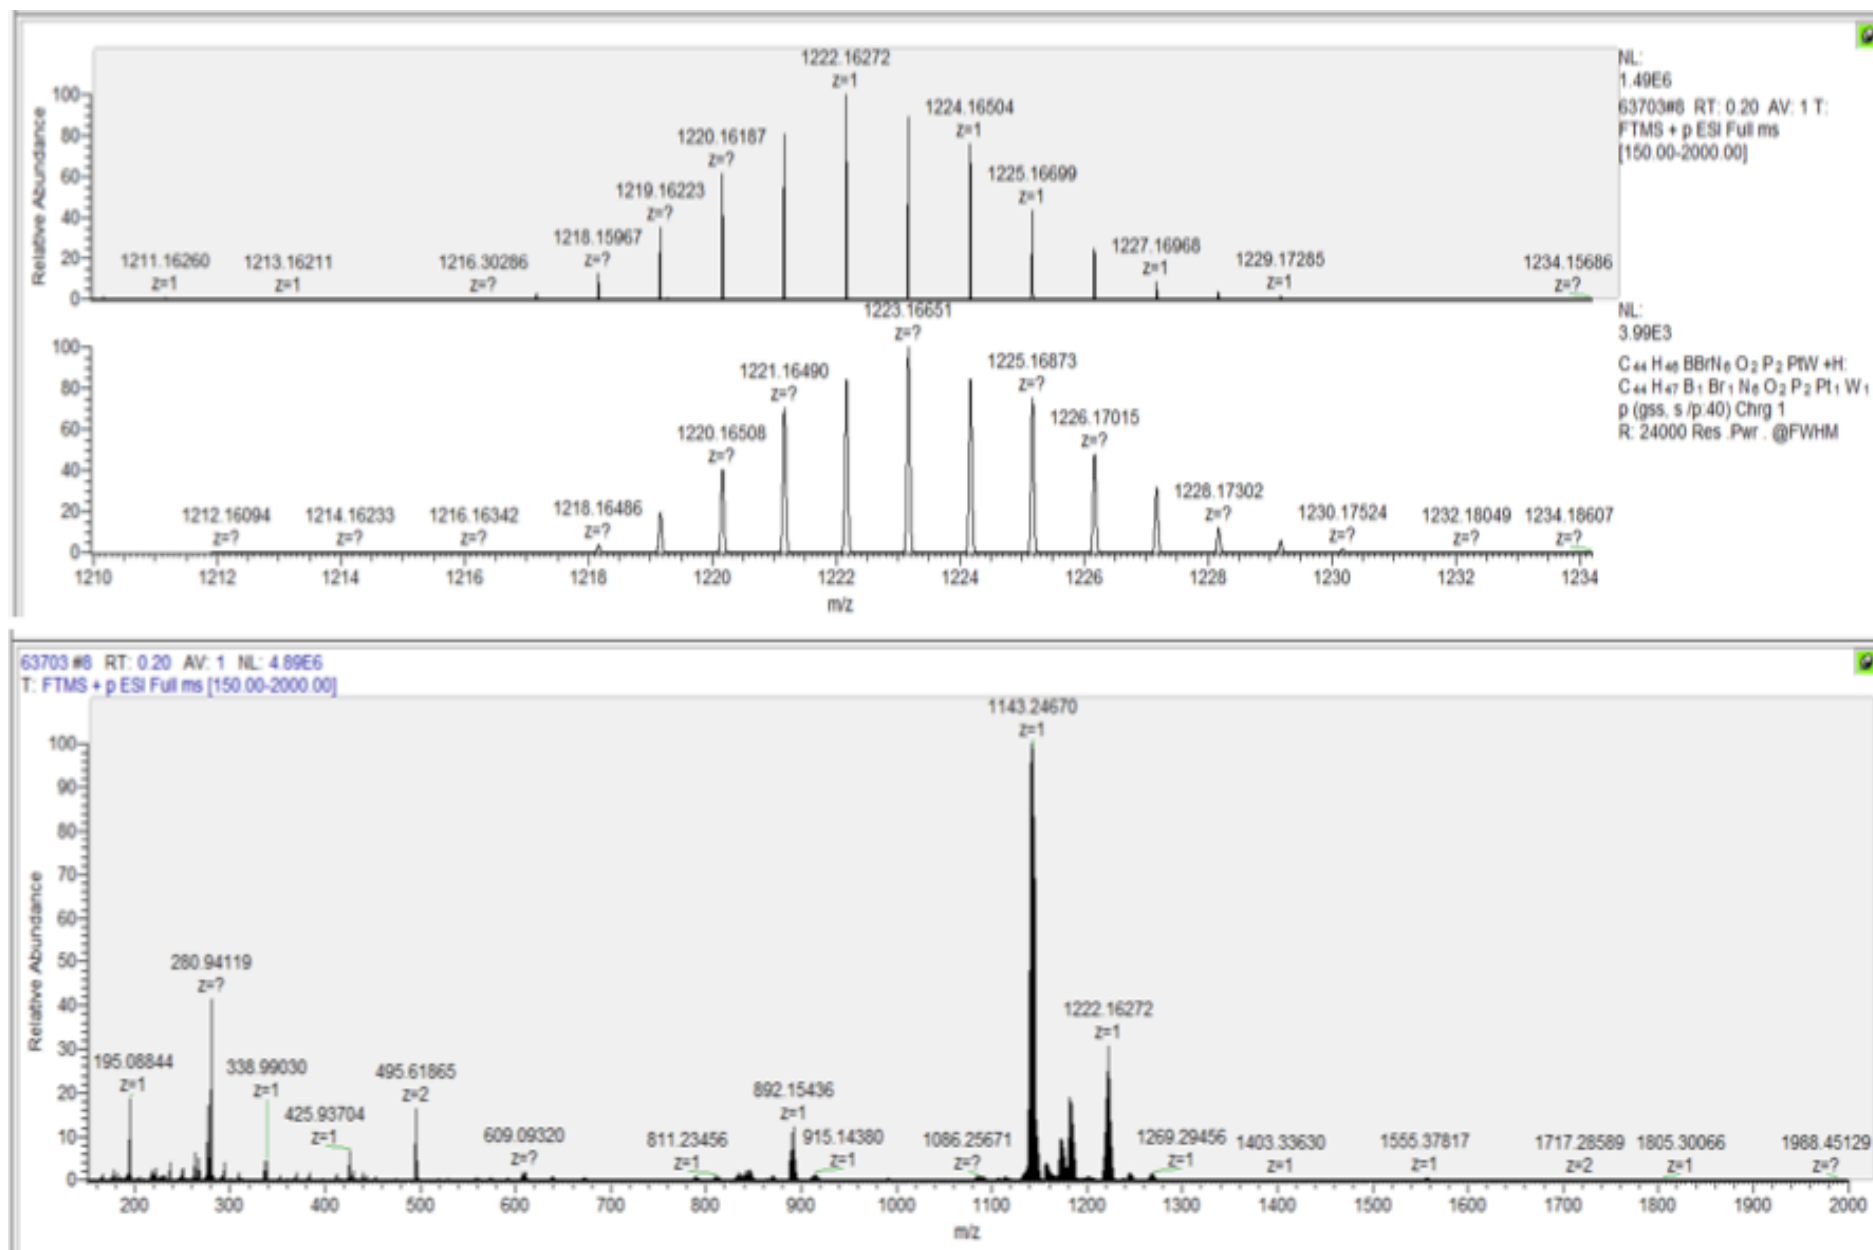

Figure S16:  $^1\text{H}$  NMR Spectrum of (7)  $[(\text{Tp}^*)(\text{CO})_2\text{W}\equiv\text{C}-\text{Pt}(\text{S}_2\text{CNEt}_2)(\text{PPh}_3)]$  (700 MHz,  $\text{CDCl}_3$ , 25  $^\circ\text{C}$ ,  $\delta$ ):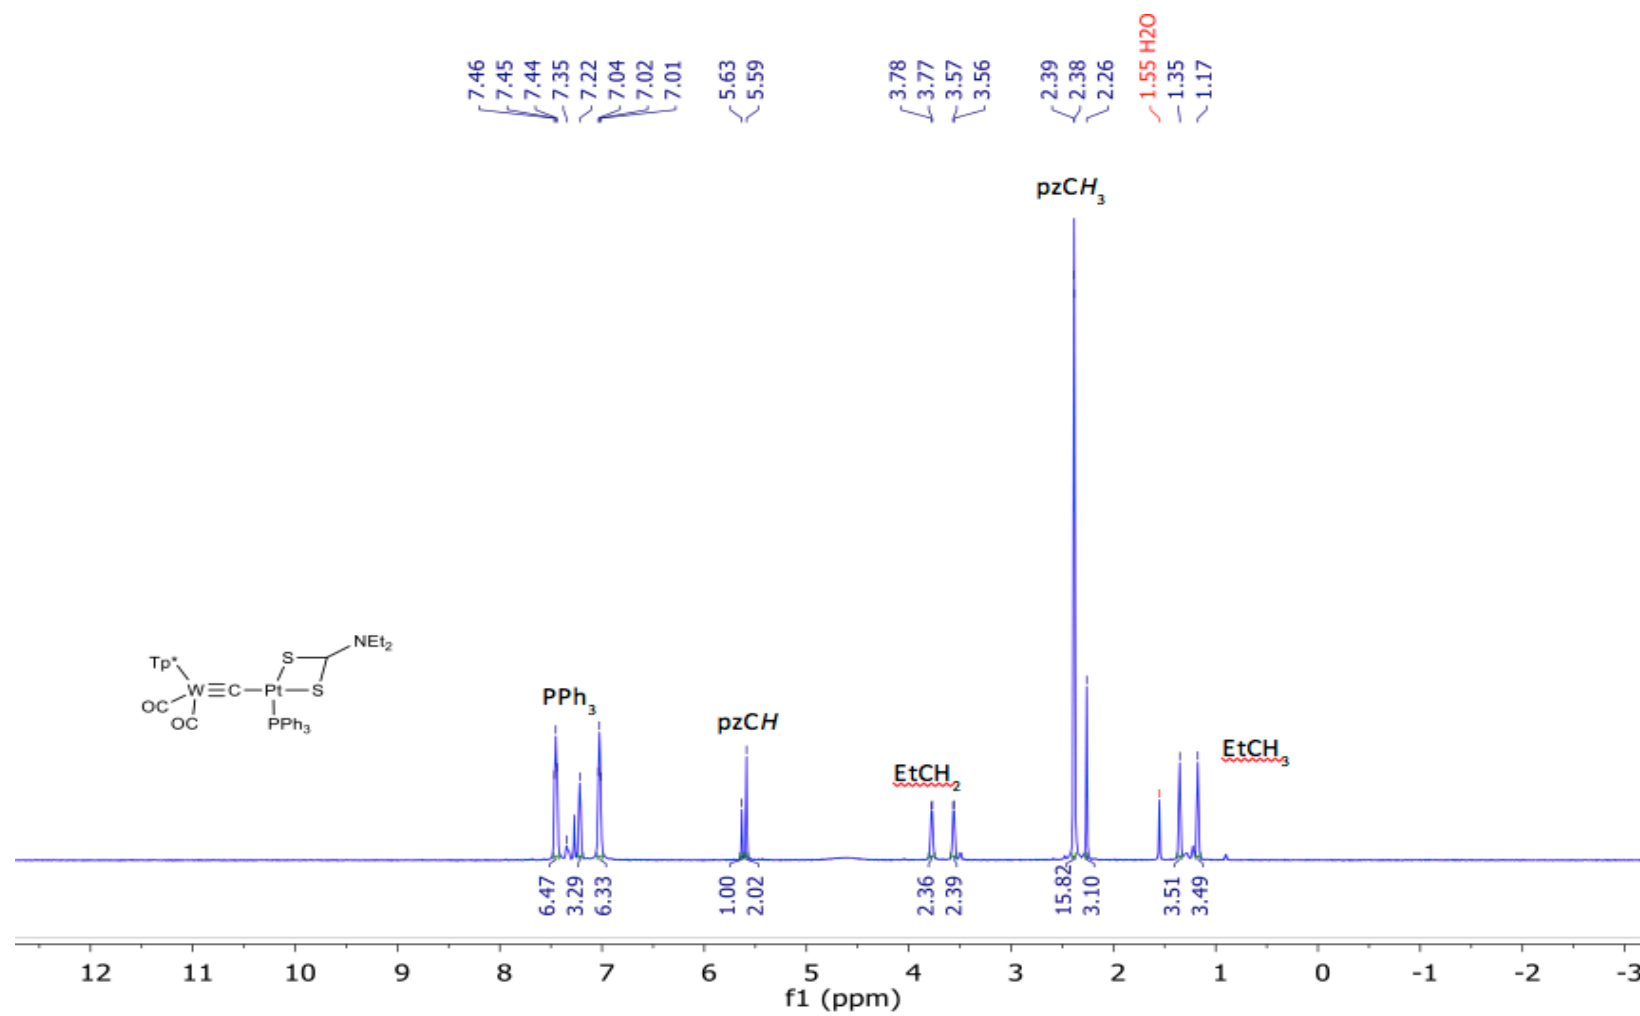



Figure S17:  $^{13}\text{C}\{^1\text{H}\}$  NMR Spectrum of (7)  $[(\text{Tp}^*)(\text{CO})_2\text{W}\equiv\text{C}-\text{Pt}(\text{S}_2\text{CNEt}_2)(\text{PPh}_3)]$  (151 MHz,  $\text{CDCl}_3$ , 25 °C,  $\delta$ ):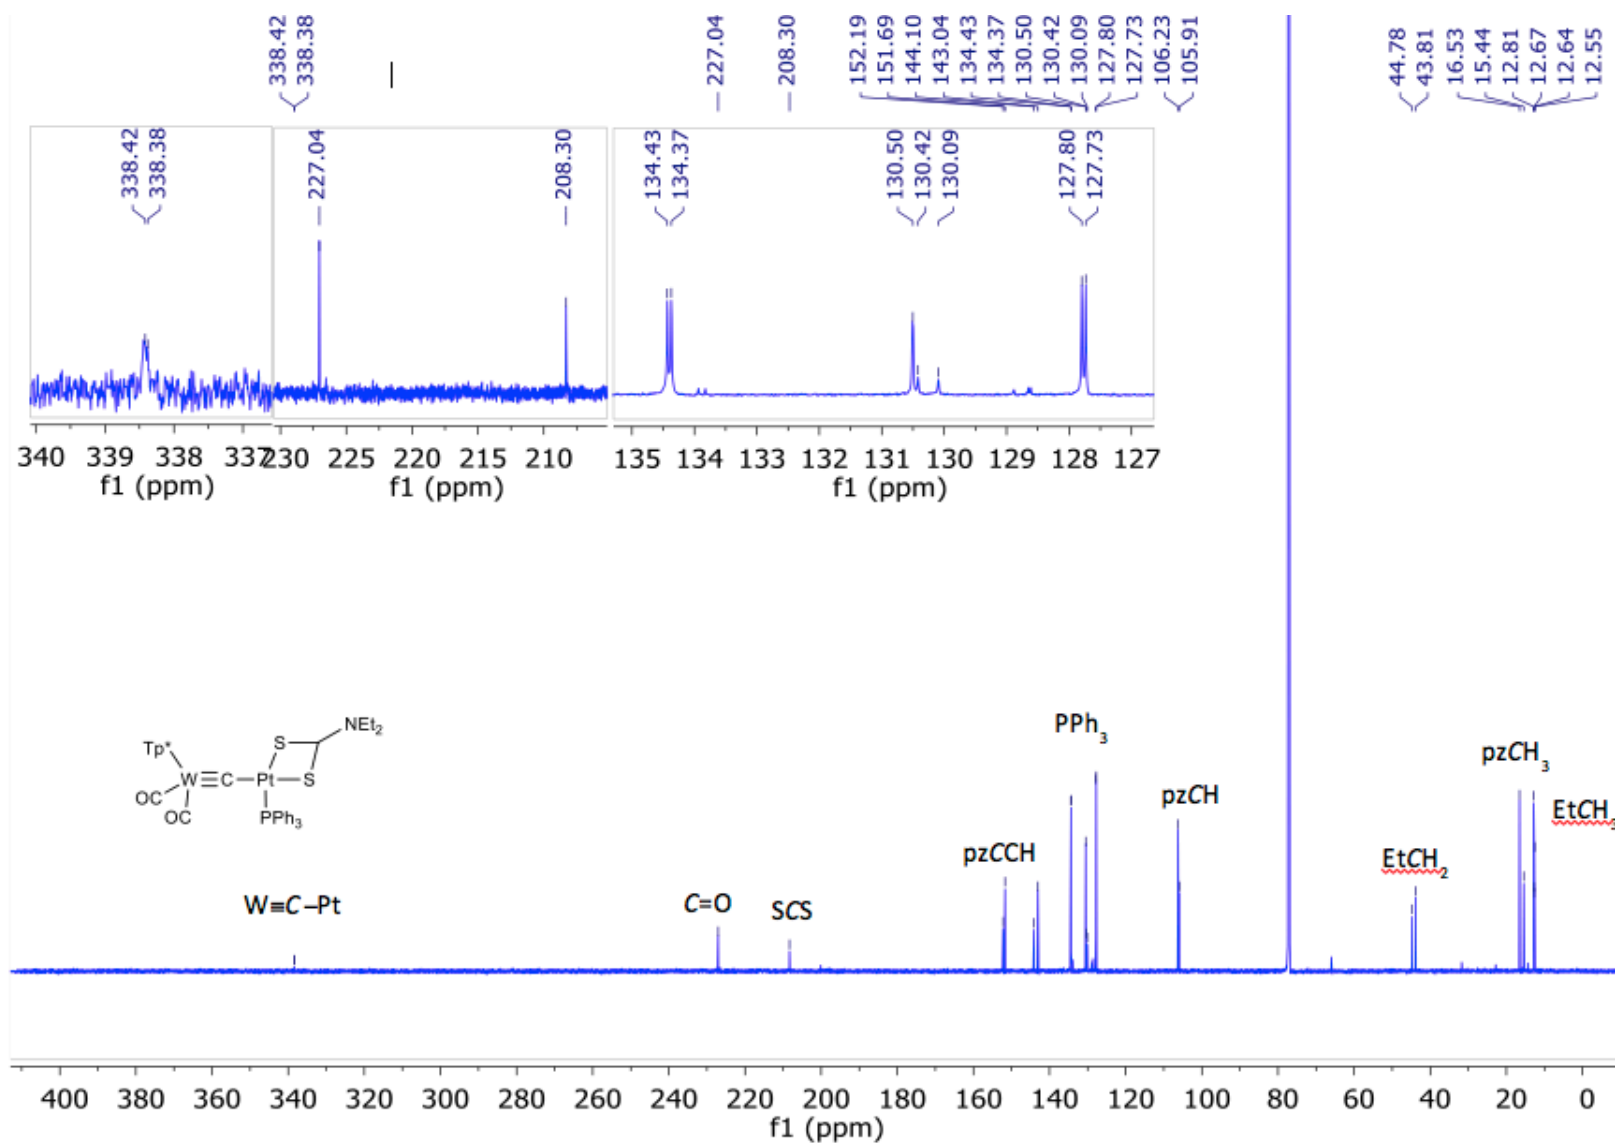

Figure S18:  $^{31}\text{P}\{^1\text{H}\}$  NMR Spectrum of (7)  $[(\text{Tp}^*)(\text{CO})_2\text{W}\equiv\text{C}-\text{Pt}(\text{S}_2\text{CNEt}_2)(\text{PPh}_3)]$  (162 MHz,  $\text{CDCl}_3$ , 25 °C,  $\delta$ ):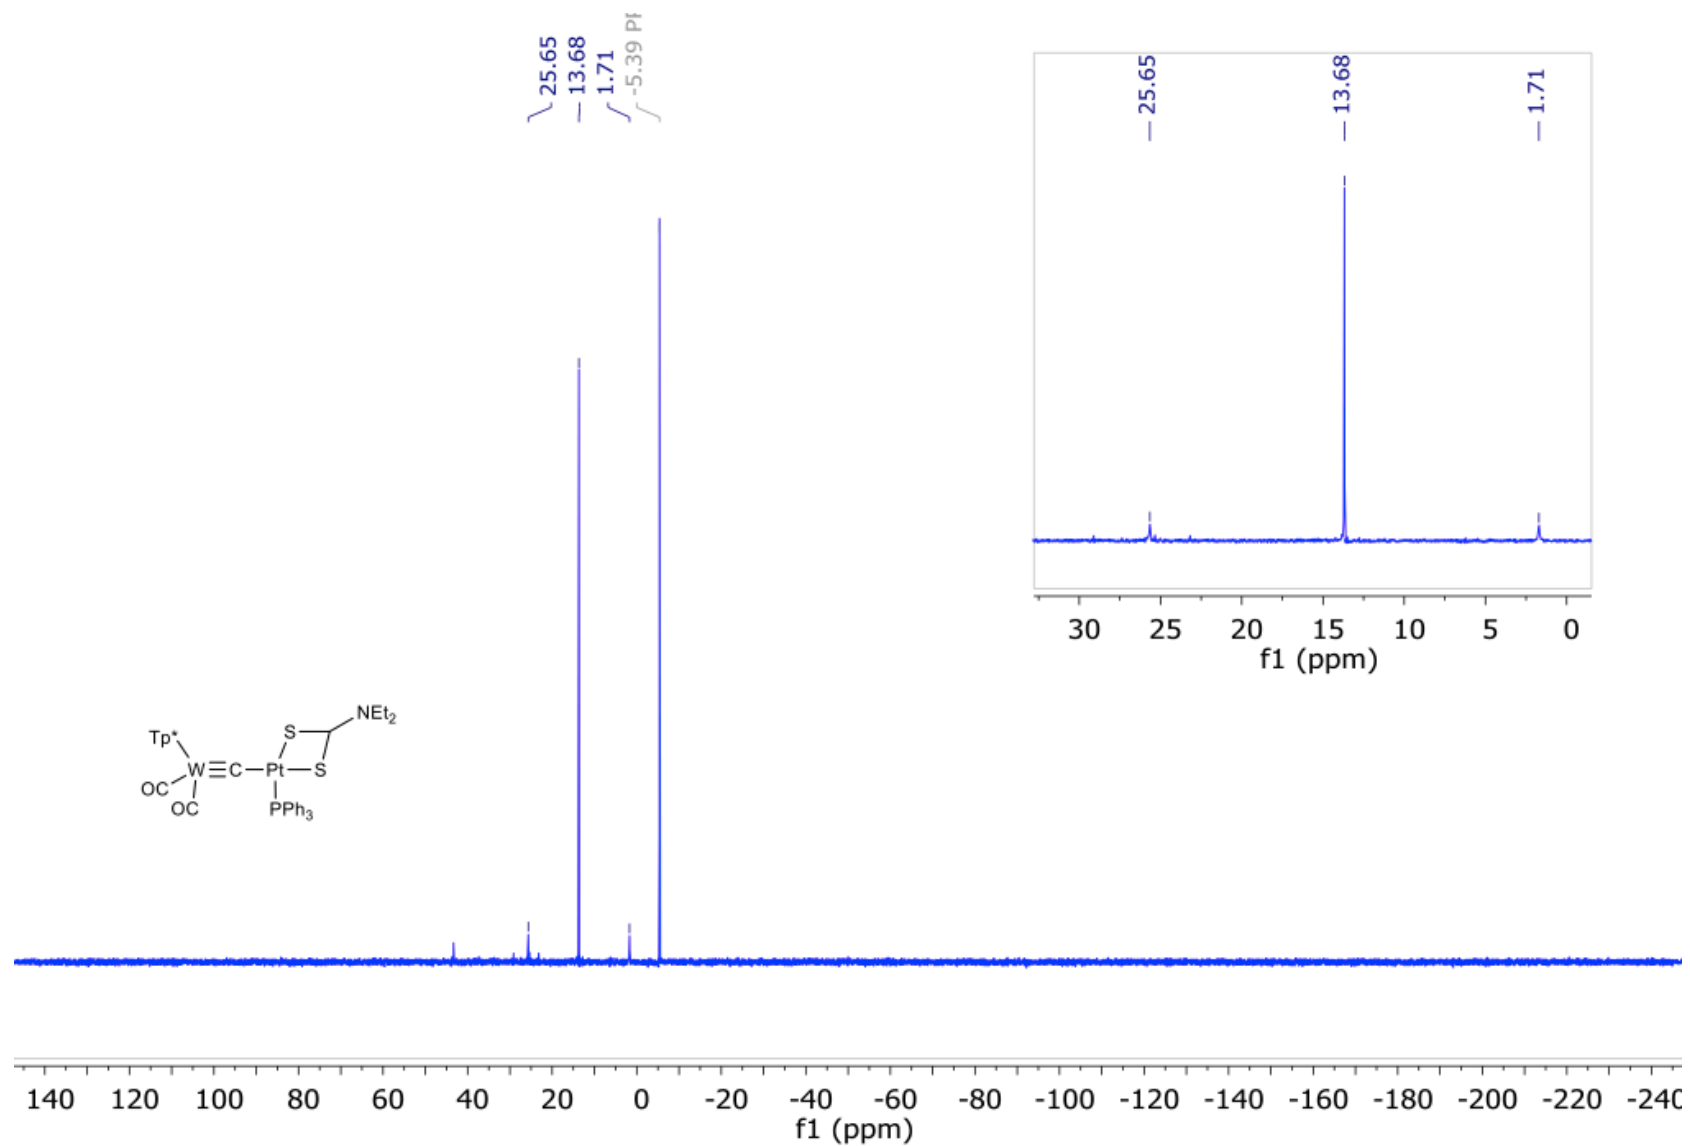

Figure S19:  $^{195}\text{Pt}\{^1\text{H}\}$  NMR Spectrum of (9)  $[(\text{Tp}^*)(\text{CO})_2\text{W}\equiv\text{C}-\text{Pt}(\text{S}_2\text{CNEt}_2)(\text{PPh}_3)]$  86 MHz,  $\text{CDCl}_3$ , 25 °C,  $\delta$ ):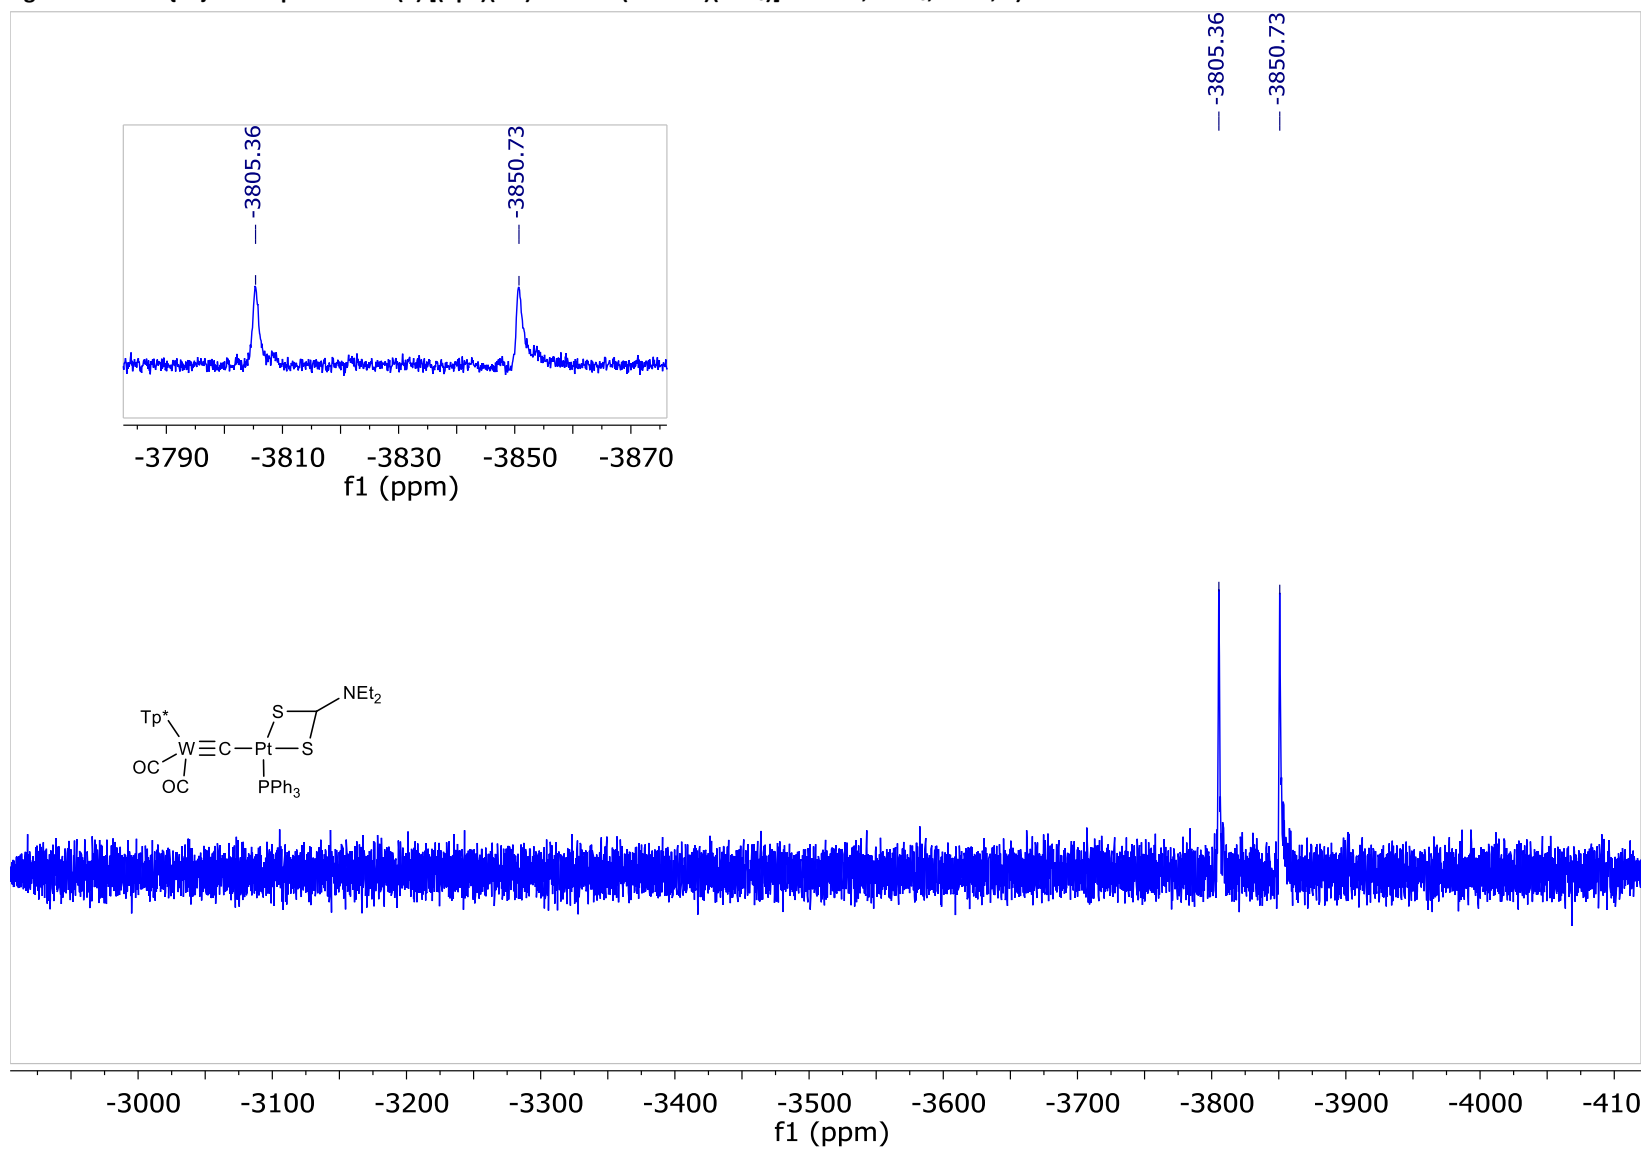

Figure S20: Infrared Spectrum of (9)  $[(Tp^*)(CO)_2W\equiv C-Pt\{SC(=S)NEt_2\}(PPh_3)]$  ( $CH_2Cl_2$ , 25 °C,  $\nu$ ):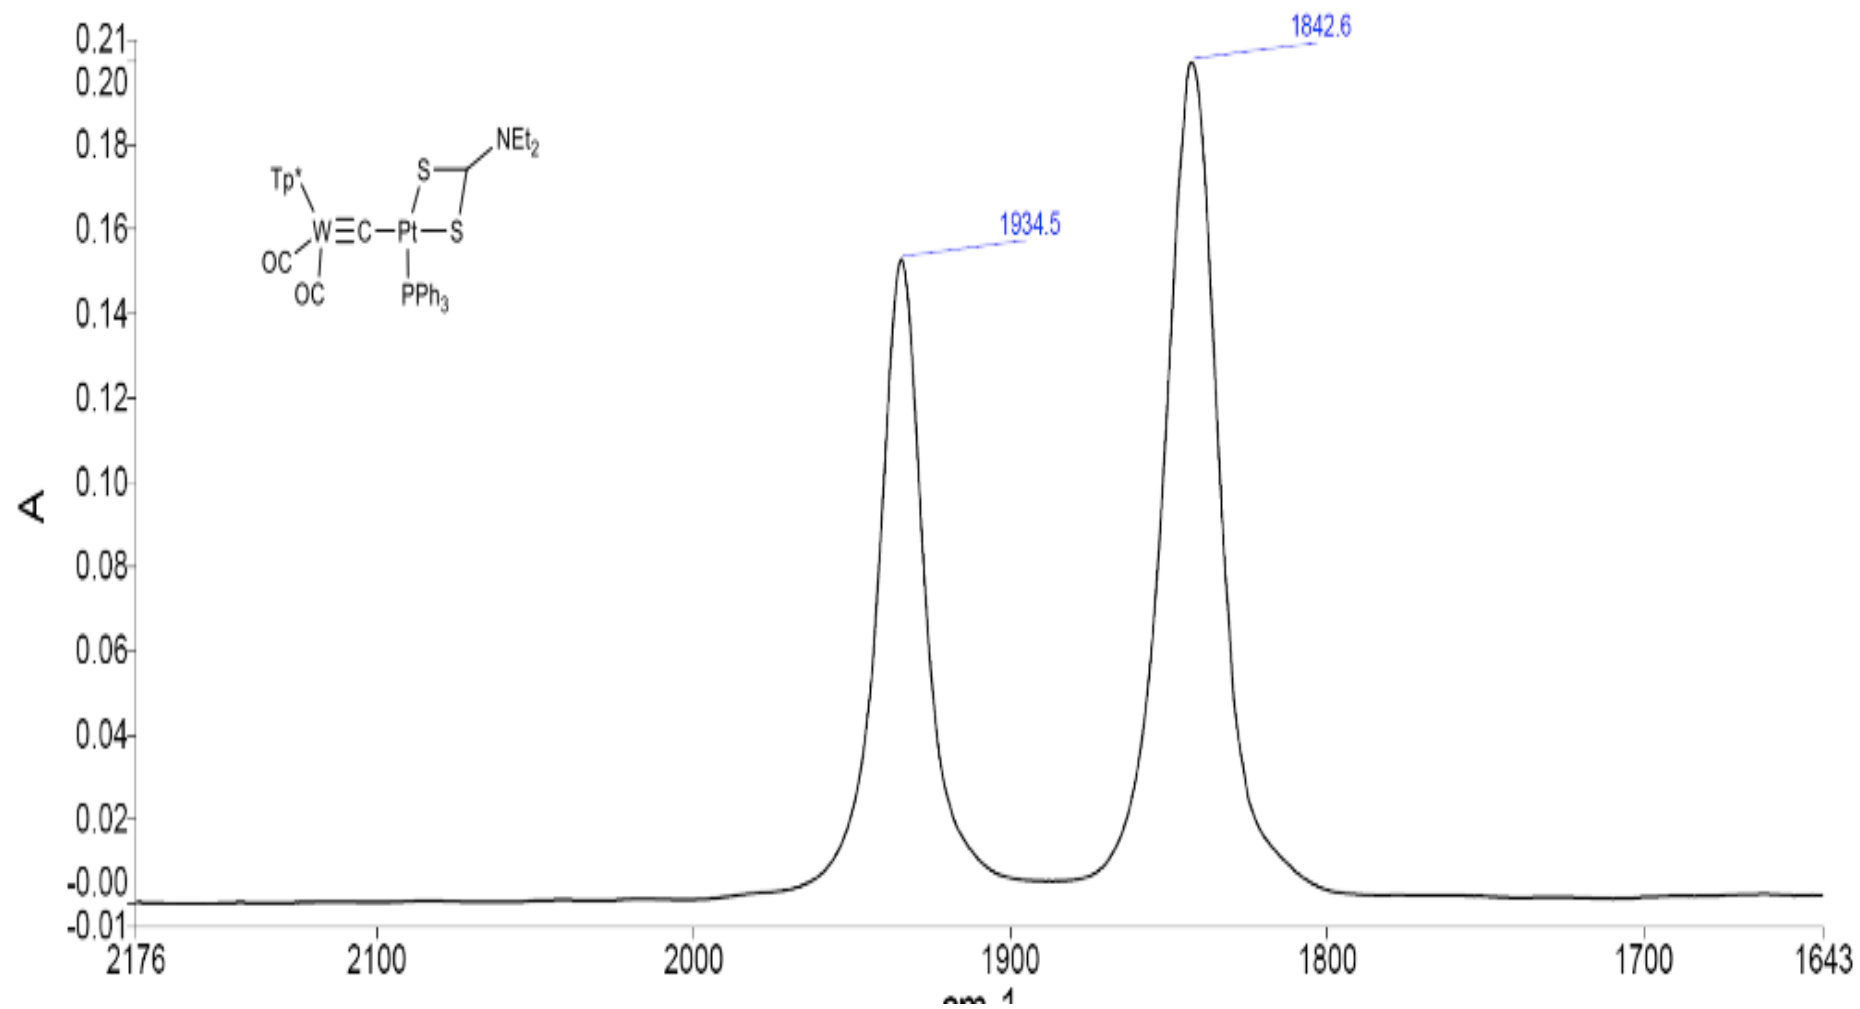

Figure S21:  $^{13}\text{C}\{^1\text{H}\}$  NMR Spectrum of  $[\text{9}]\text{PF}_6$   $[(\text{Tp}^*)(\text{CO})_2\text{W}=\text{C}-\text{Pt}(\text{phen})(\text{PPh}_3)][\text{PF}_6]$  (151 MHz,  $\text{CDCl}_3$ , 25 °C,  $\delta$ ):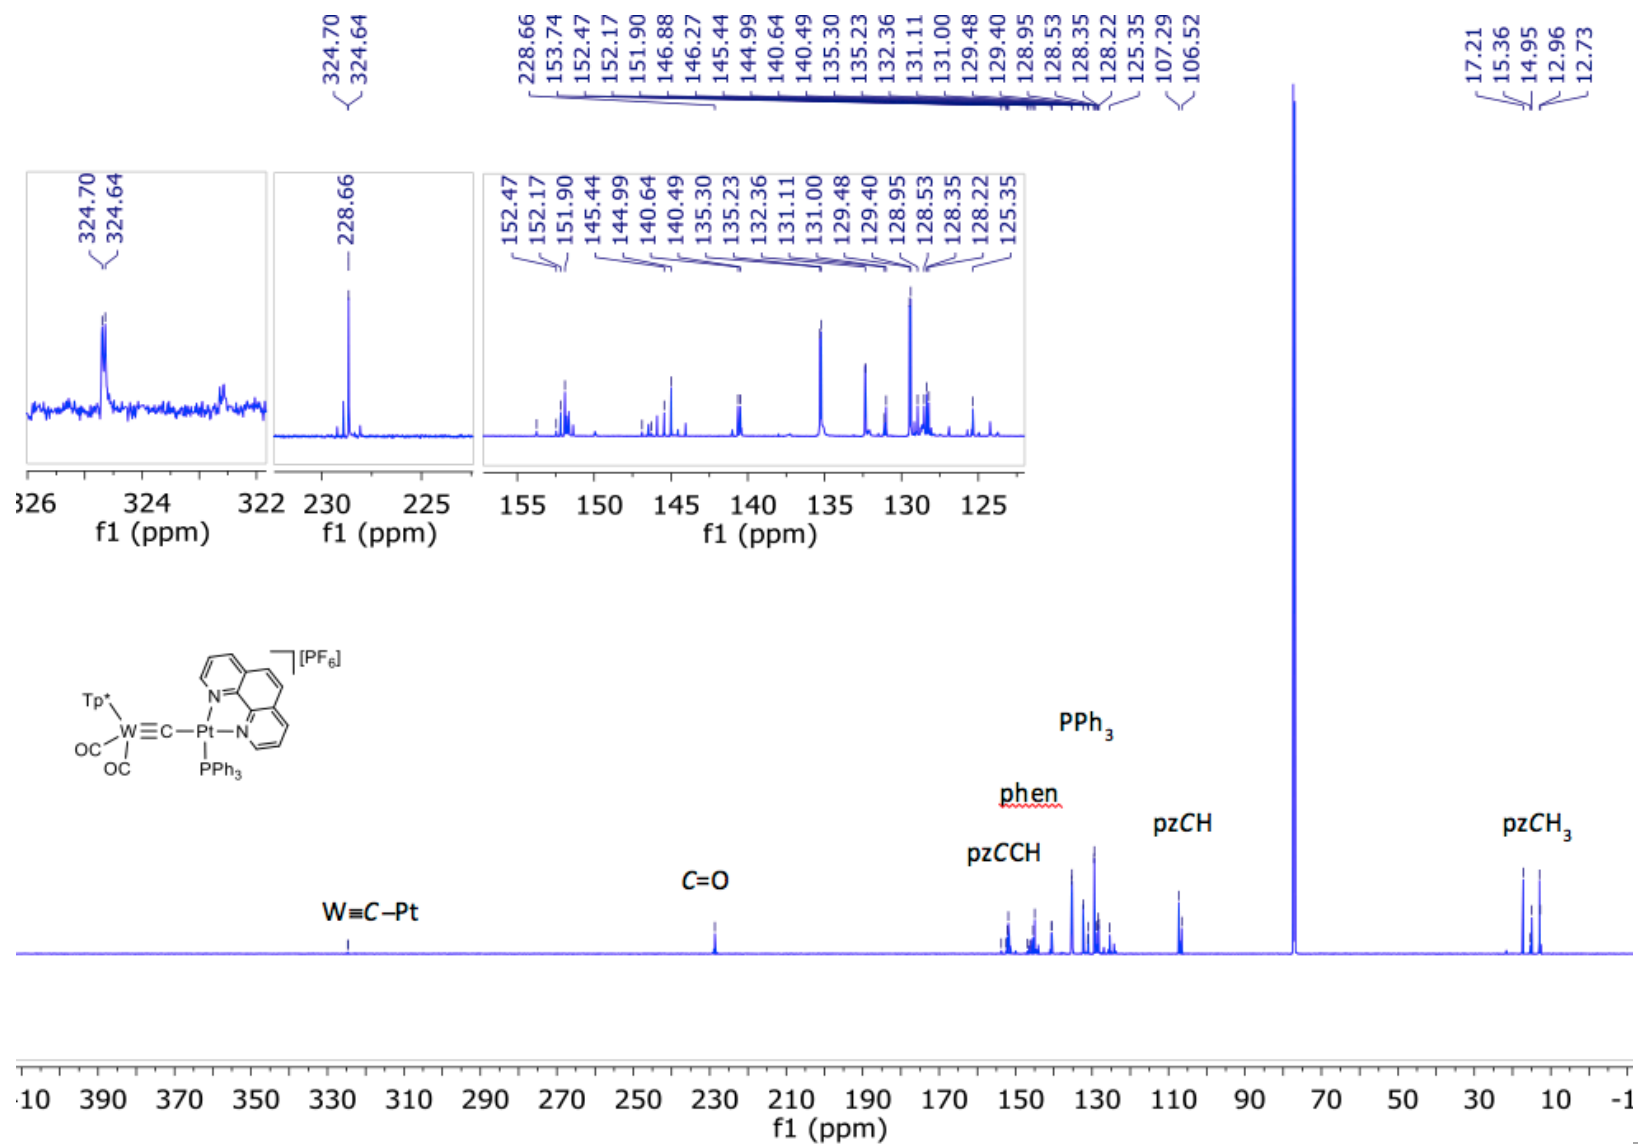

Figure S22:  $^{31}\text{P}\{^1\text{H}\}$  NMR Spectrum of  $[\text{9}]\text{PF}_6$   $[(\text{Tp}^*)(\text{CO})_2\text{W}\equiv\text{C}-\text{Pt}(\text{phen})(\text{PPh}_3)][\text{PF}_6]$  (162 MHz,  $\text{CDCl}_3$ , 25 °C,  $\delta$ ):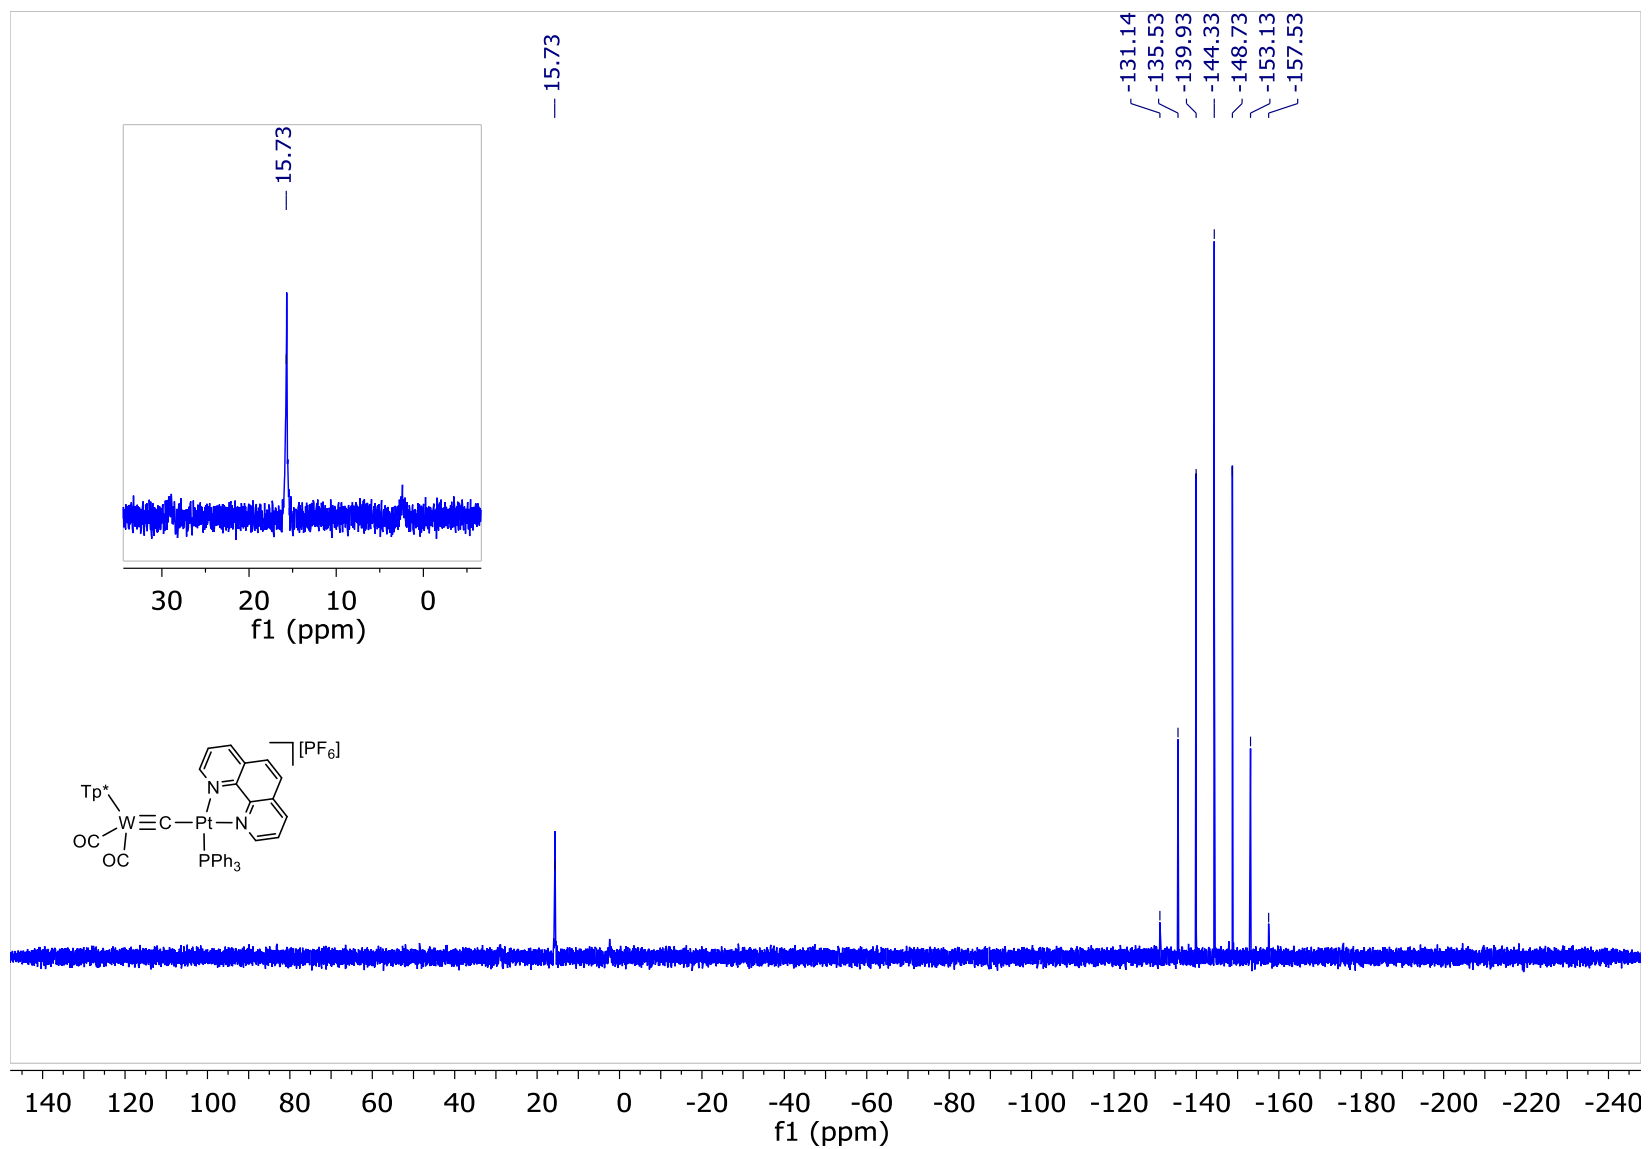

**Figure S23:**  $^{195}\text{Pt}\{^1\text{H}\}$  NMR Spectrum of  $[\text{9}]\text{PF}_6$   $[(\text{Tp}^*)(\text{CO})_2\text{W}\equiv\text{C}-\text{Pt}(\text{phen})(\text{PPh}_3)][\text{PF}_6]$  (86 MHz,  $\text{CDCl}_3$ , 25 °C,  $\delta$ ):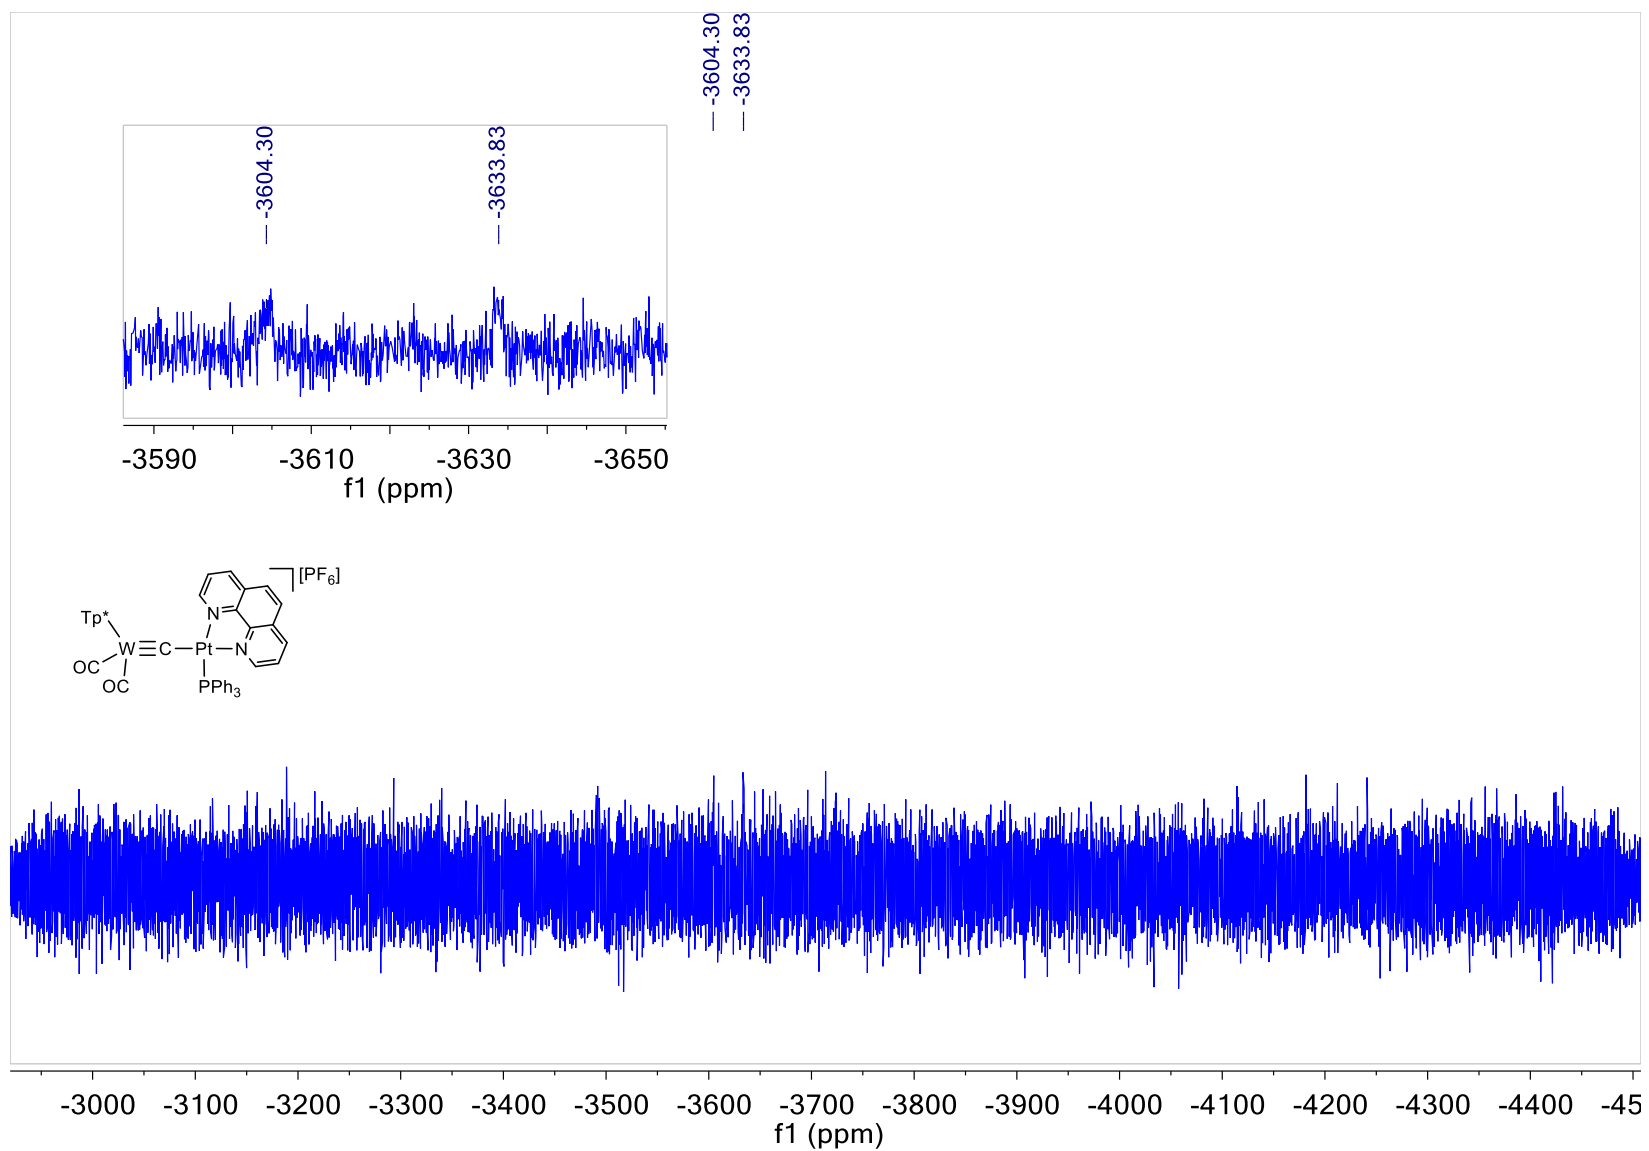

**Figure S24: Infrared Spectrum of [89]PF<sub>6</sub> [(Tp\*)(CO)<sub>2</sub>W≡C-Pt(phen)(PPh<sub>3</sub>)] [PF<sub>6</sub>] (CH<sub>2</sub>Cl<sub>2</sub>, 25 °C, ν):**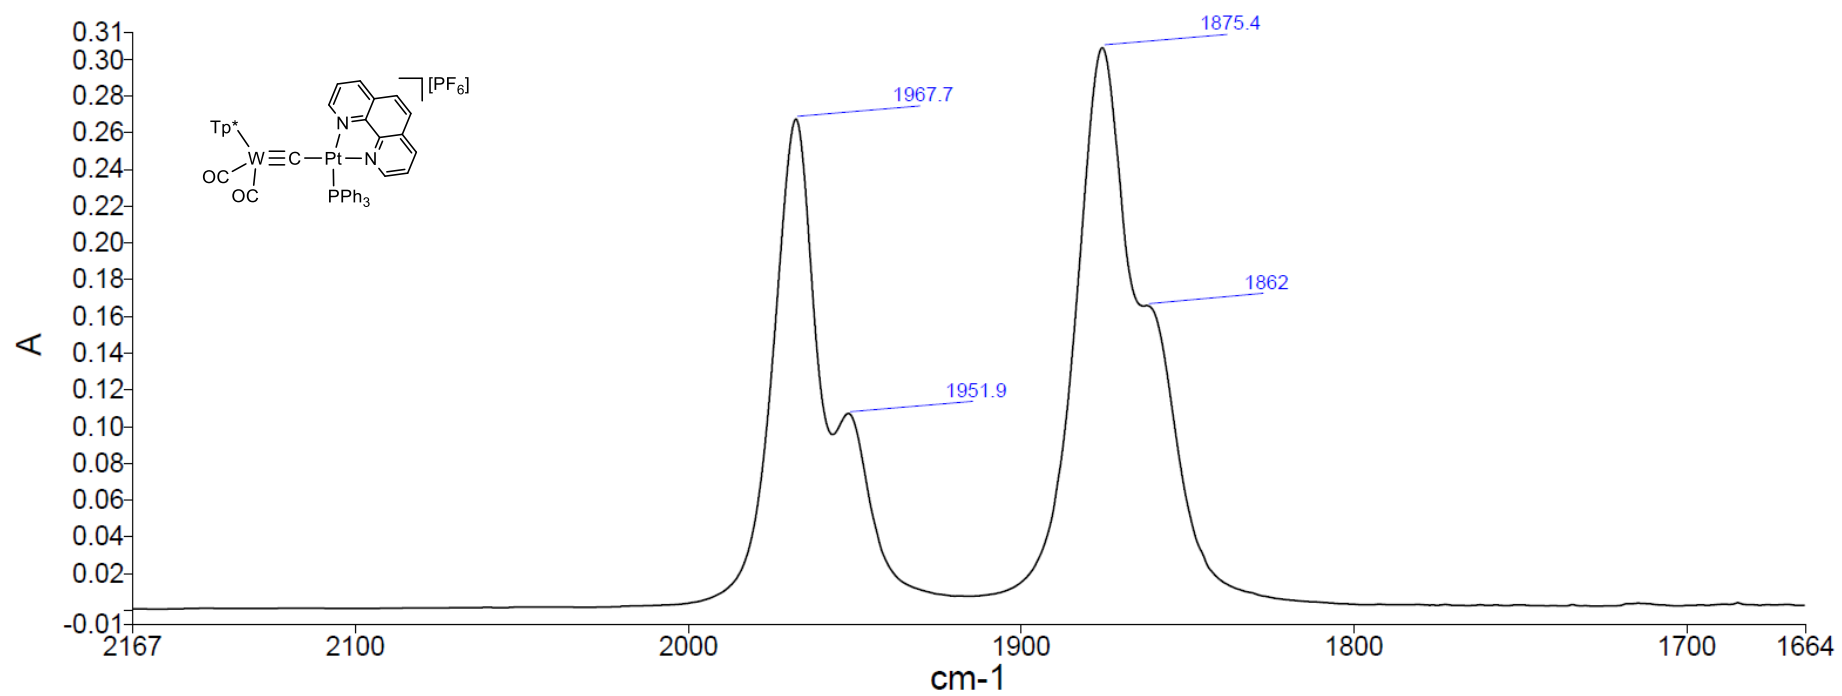



Figure S25: Mass Spectrum of [9]PF<sub>6</sub> [(Tp\*)(CO)<sub>2</sub>W≡C-Pt(phen)(PPh<sub>3</sub>)] [PF<sub>6</sub>] (ESI):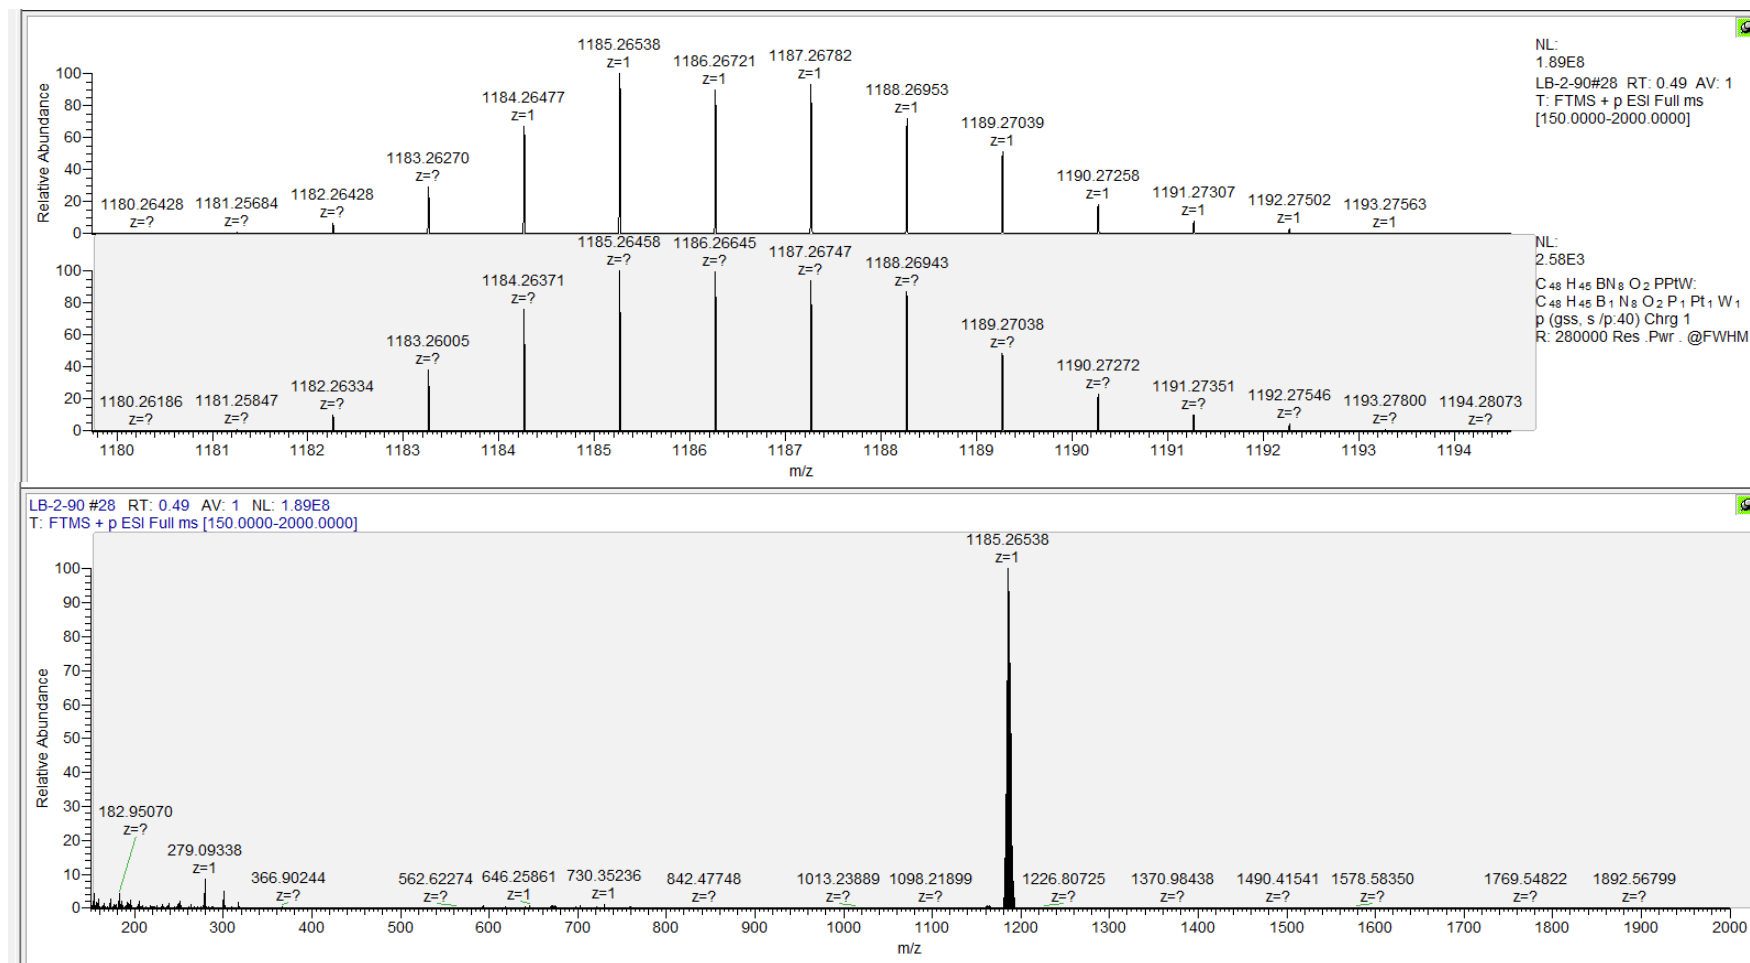

Figure S26:  $^1\text{H}$  NMR Spectrum of  $[10\text{a}]\text{PF}_6$   $[(\text{Tp}^*)(\text{CO})_2\text{W}\equiv\text{C}-\text{Pt}(\text{bpy})(\text{PPh}_3)][\text{PF}_6]$  (400 MHz,  $\text{CDCl}_3$ , 25  $^\circ\text{C}$ ,  $\delta$ ):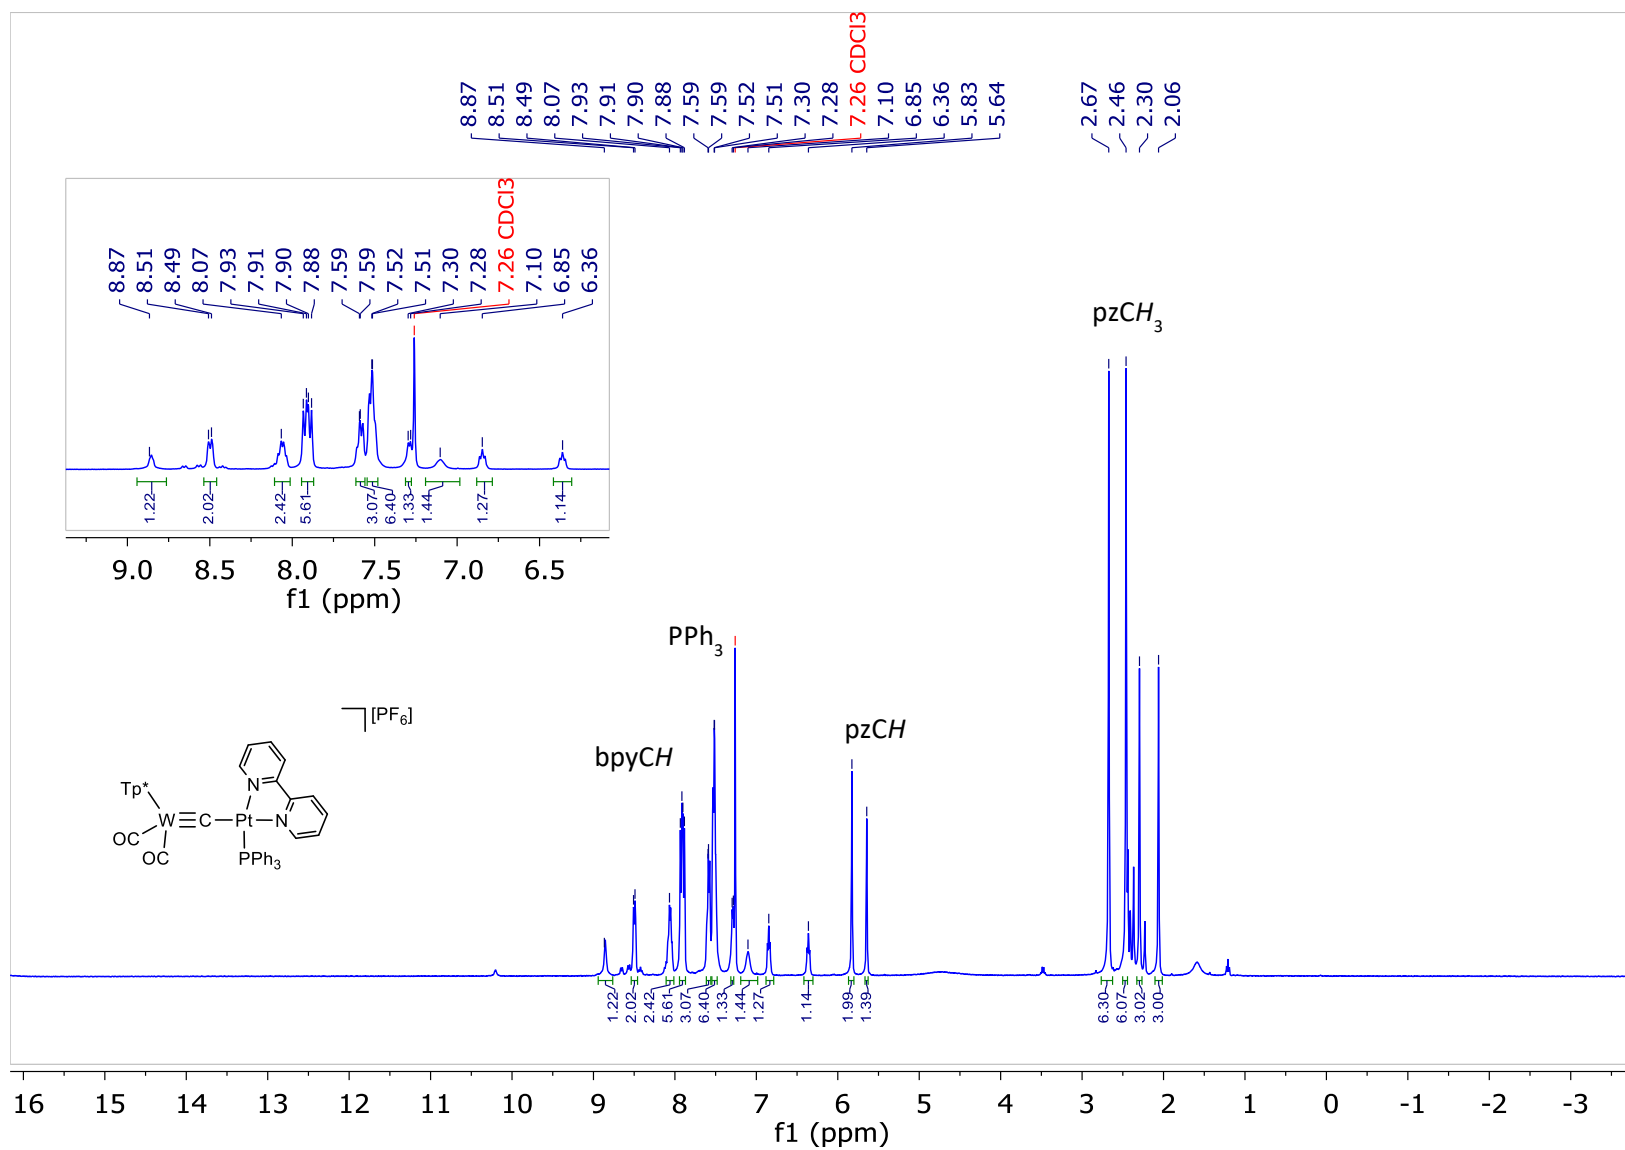

Figure S27:  $^{13}\text{C}\{^1\text{H}\}$  NMR Spectrum of  $[\text{10a}]\text{PF}_6$   $[(\text{Tp}^*)(\text{CO})_2\text{W}\equiv\text{C}-\text{Pt}(\text{bpy})(\text{PPh}_3)][\text{PF}_6]$  (151 MHz,  $\text{CDCl}_3$ , 25 °C,  $\delta$ ):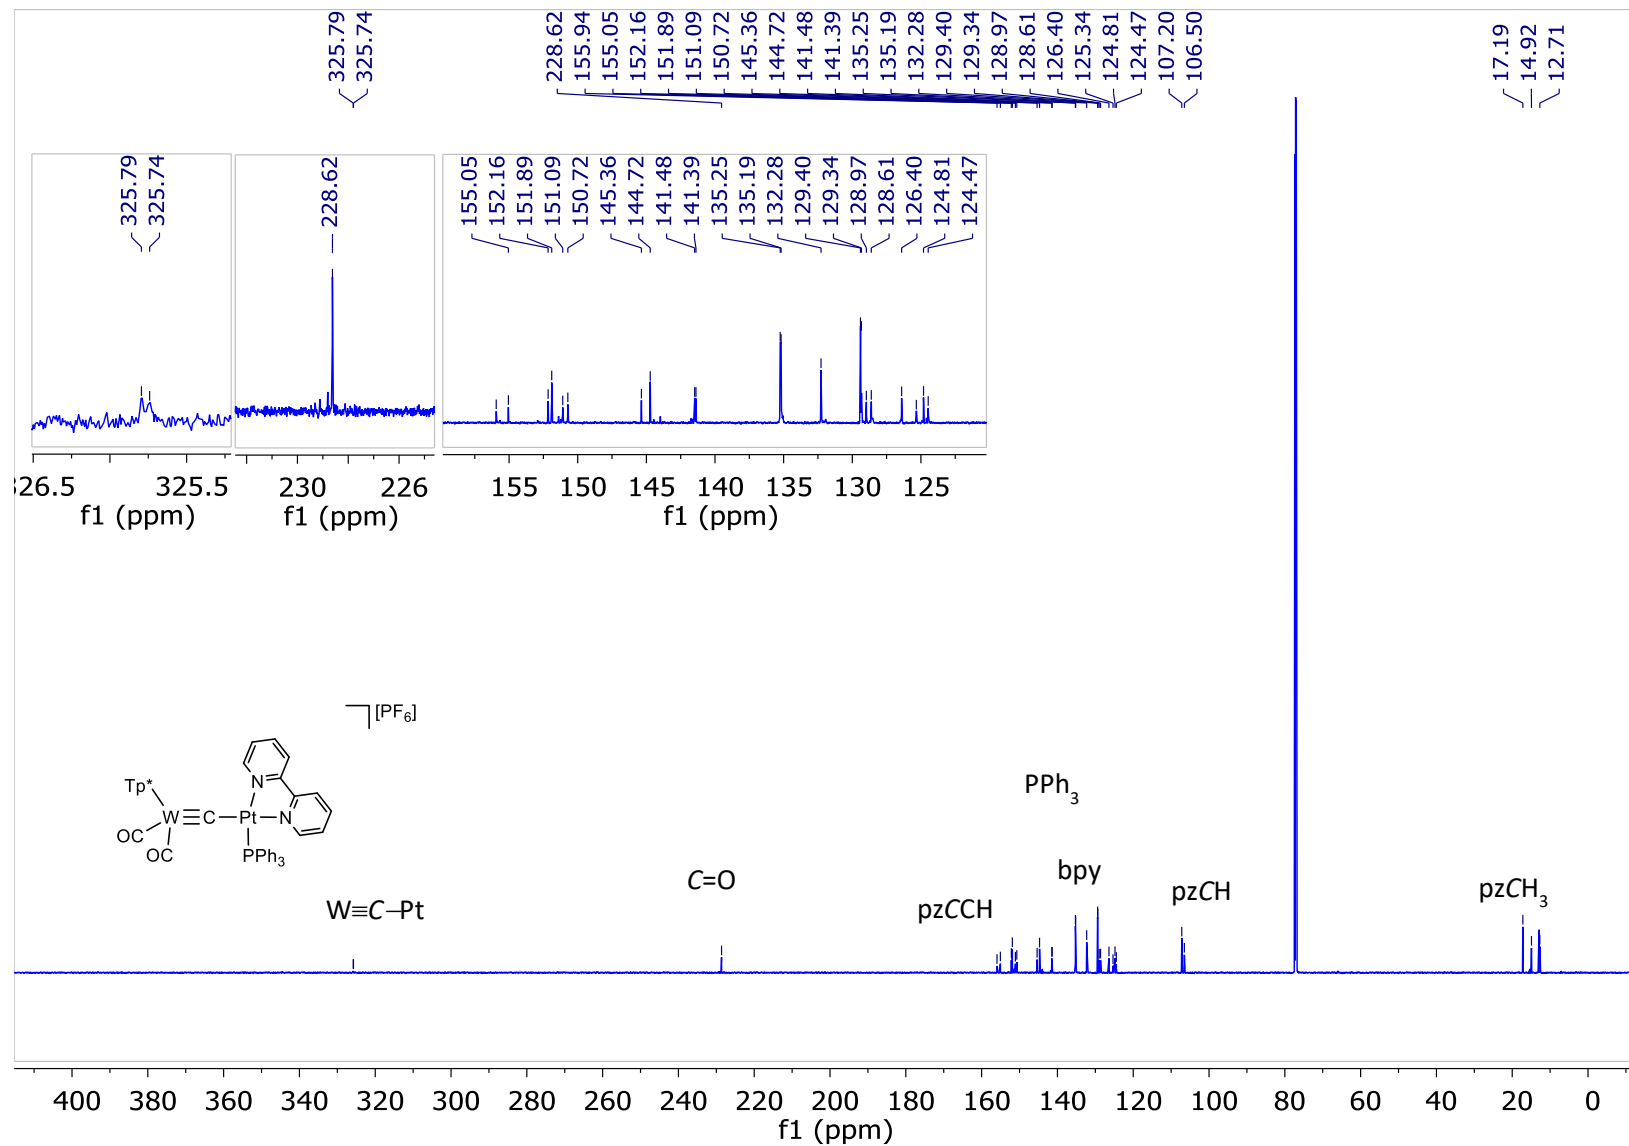

**Figure S28:**  $^{19}\text{F}\{^1\text{H}\}$  NMR Spectrum of  $[\text{10a}]\text{PF}_6$   $[(\text{Tp}^*)(\text{CO})_2\text{W}\equiv\text{C}-\text{Pt}(\text{bpy})(\text{PPh}_3)][\text{PF}_6]$  (377 MHz,  $\text{CDCl}_3$ , 25 °C,  $\delta$ ):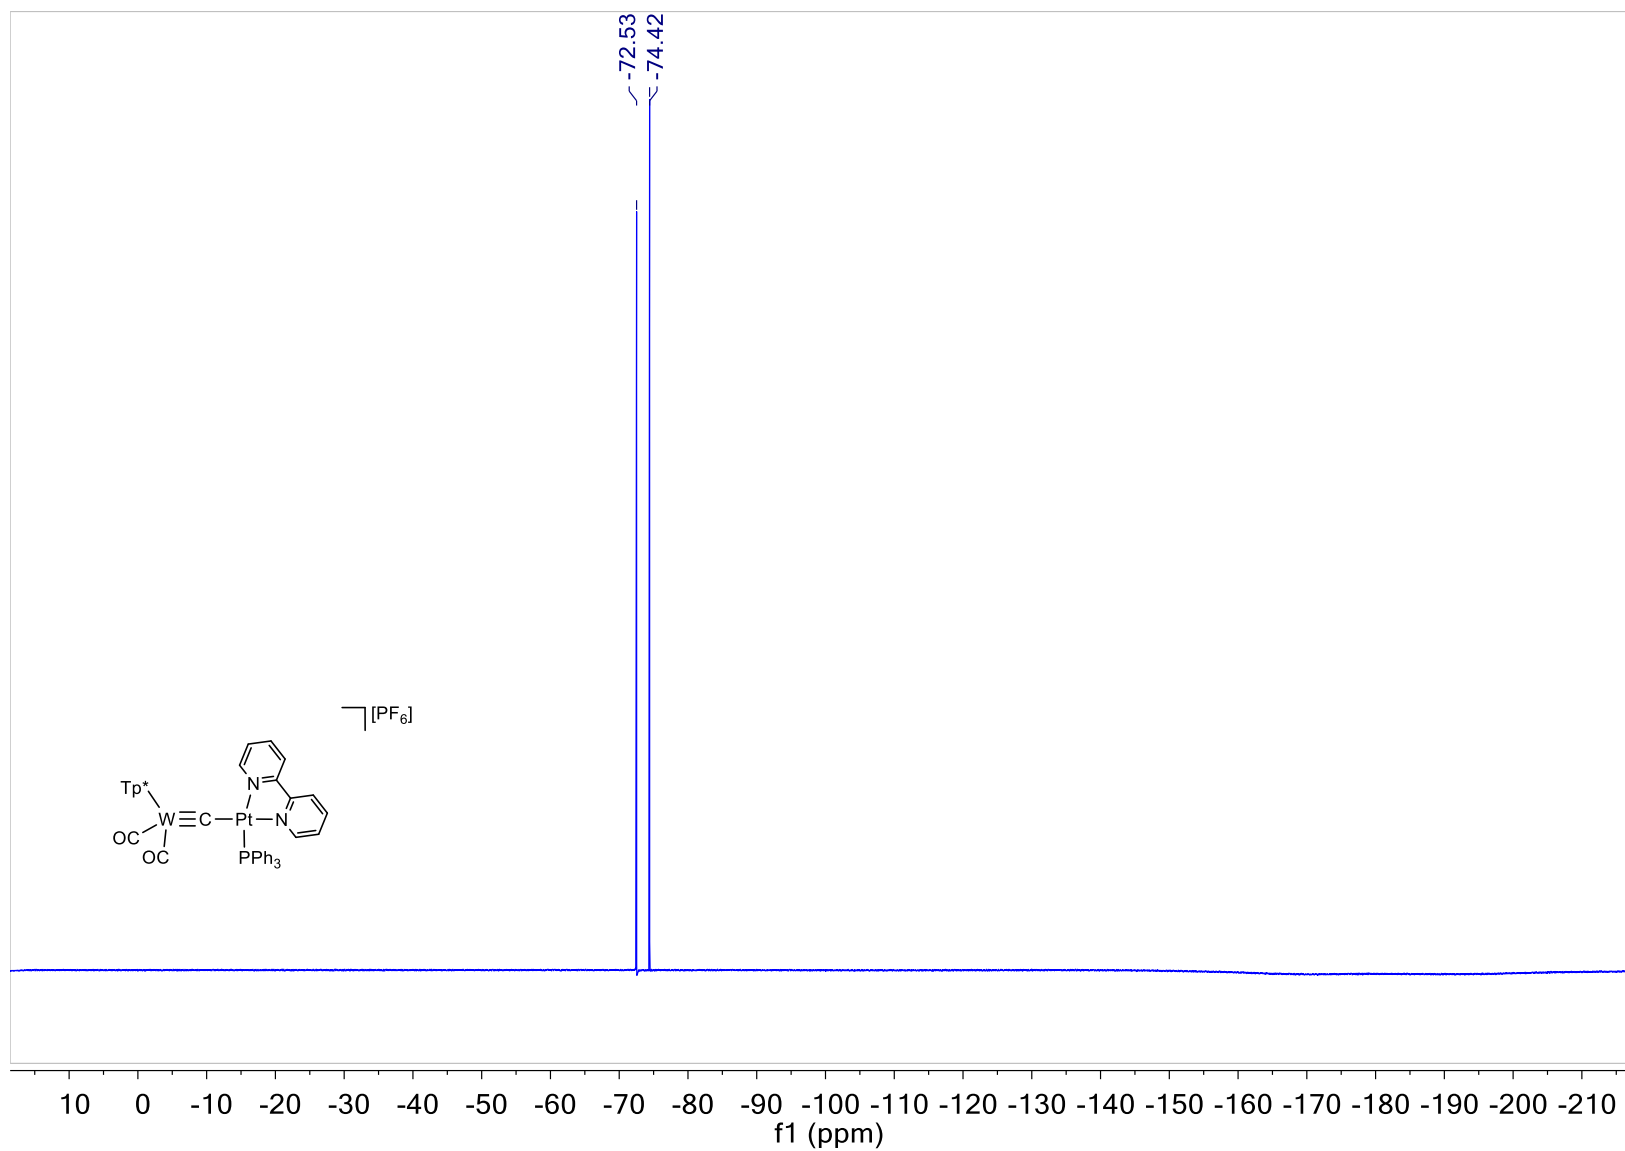

Figure S29:  $^{31}\text{P}\{^1\text{H}\}$  NMR Spectrum of  $[\text{10a}]\text{PF}_6$   $[(\text{Tp}^*)(\text{CO})_2\text{W}\equiv\text{C}-\text{Pt}(\text{bpy})(\text{PPh}_3)]\text{PF}_6$  (162 MHz,  $\text{CDCl}_3$ , 25 °C,  $\delta$ ):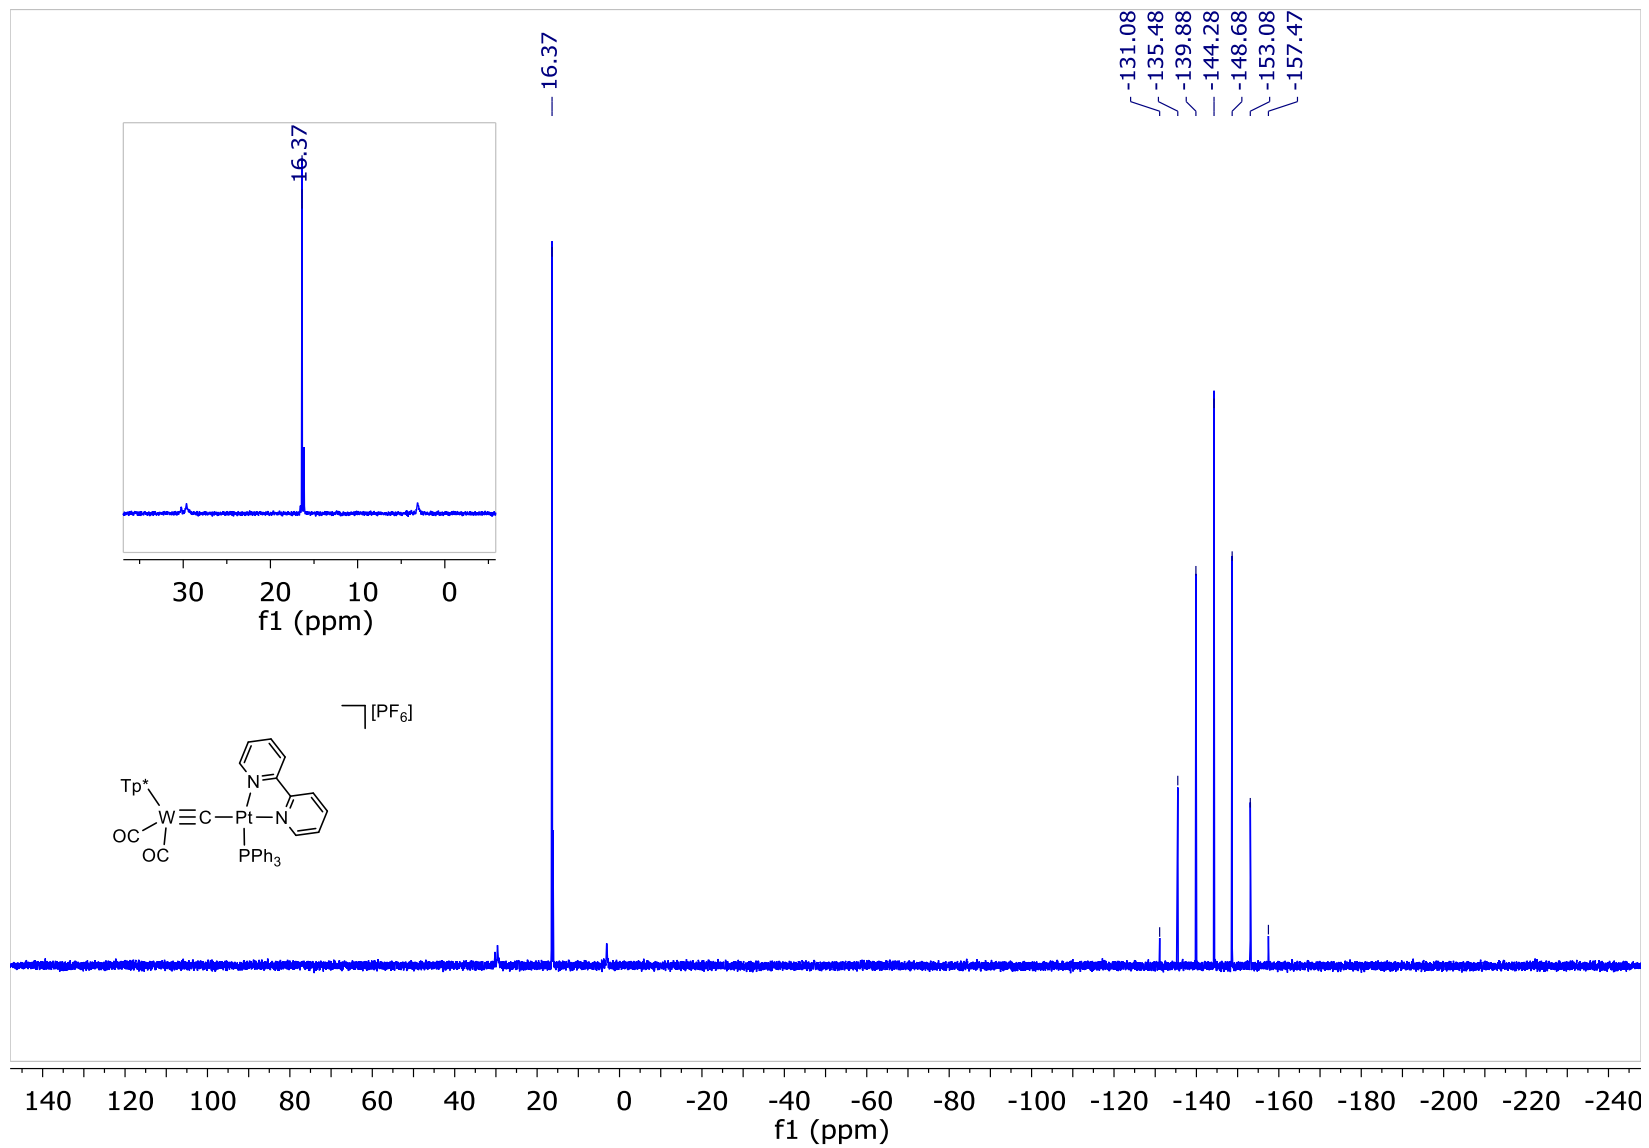

**Figure S30:**  $^{195}\text{Pt}\{^1\text{H}\}$  NMR Spectrum of  $[10a]\text{PF}_6$   $[(\text{Tp}^*)(\text{CO})_2\text{W}\equiv\text{C}-\text{Pt}(\text{bpy})(\text{PPh}_3)]$   $[\text{PF}_6]$  (86 MHz,  $\text{CDCl}_3$ , 25 °C,  $\delta$ ):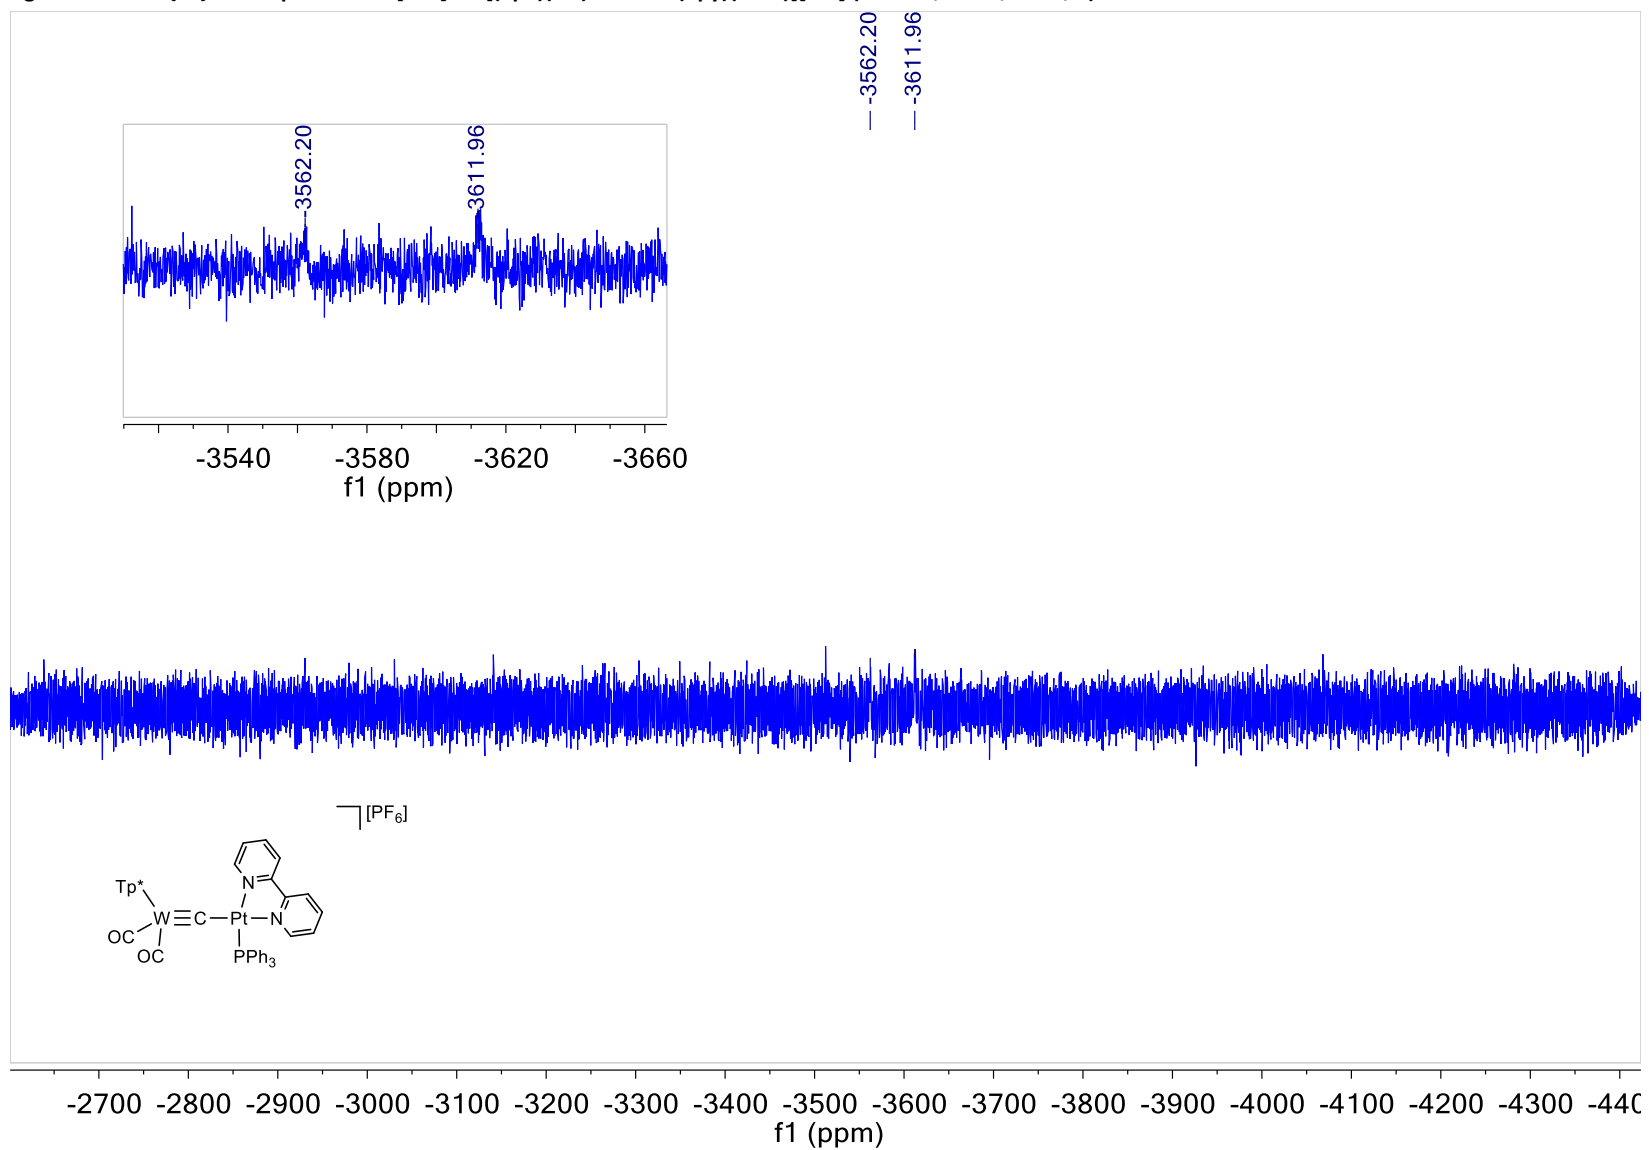

Figure S31: Infrared Spectrum of [10a]PF<sub>6</sub> [(Tp\*)(CO)<sub>2</sub>W≡C–Pt(bpy)(PPh<sub>3</sub>)] [PF<sub>6</sub>] (CH<sub>2</sub>Cl<sub>2</sub>, 25 °C, ν):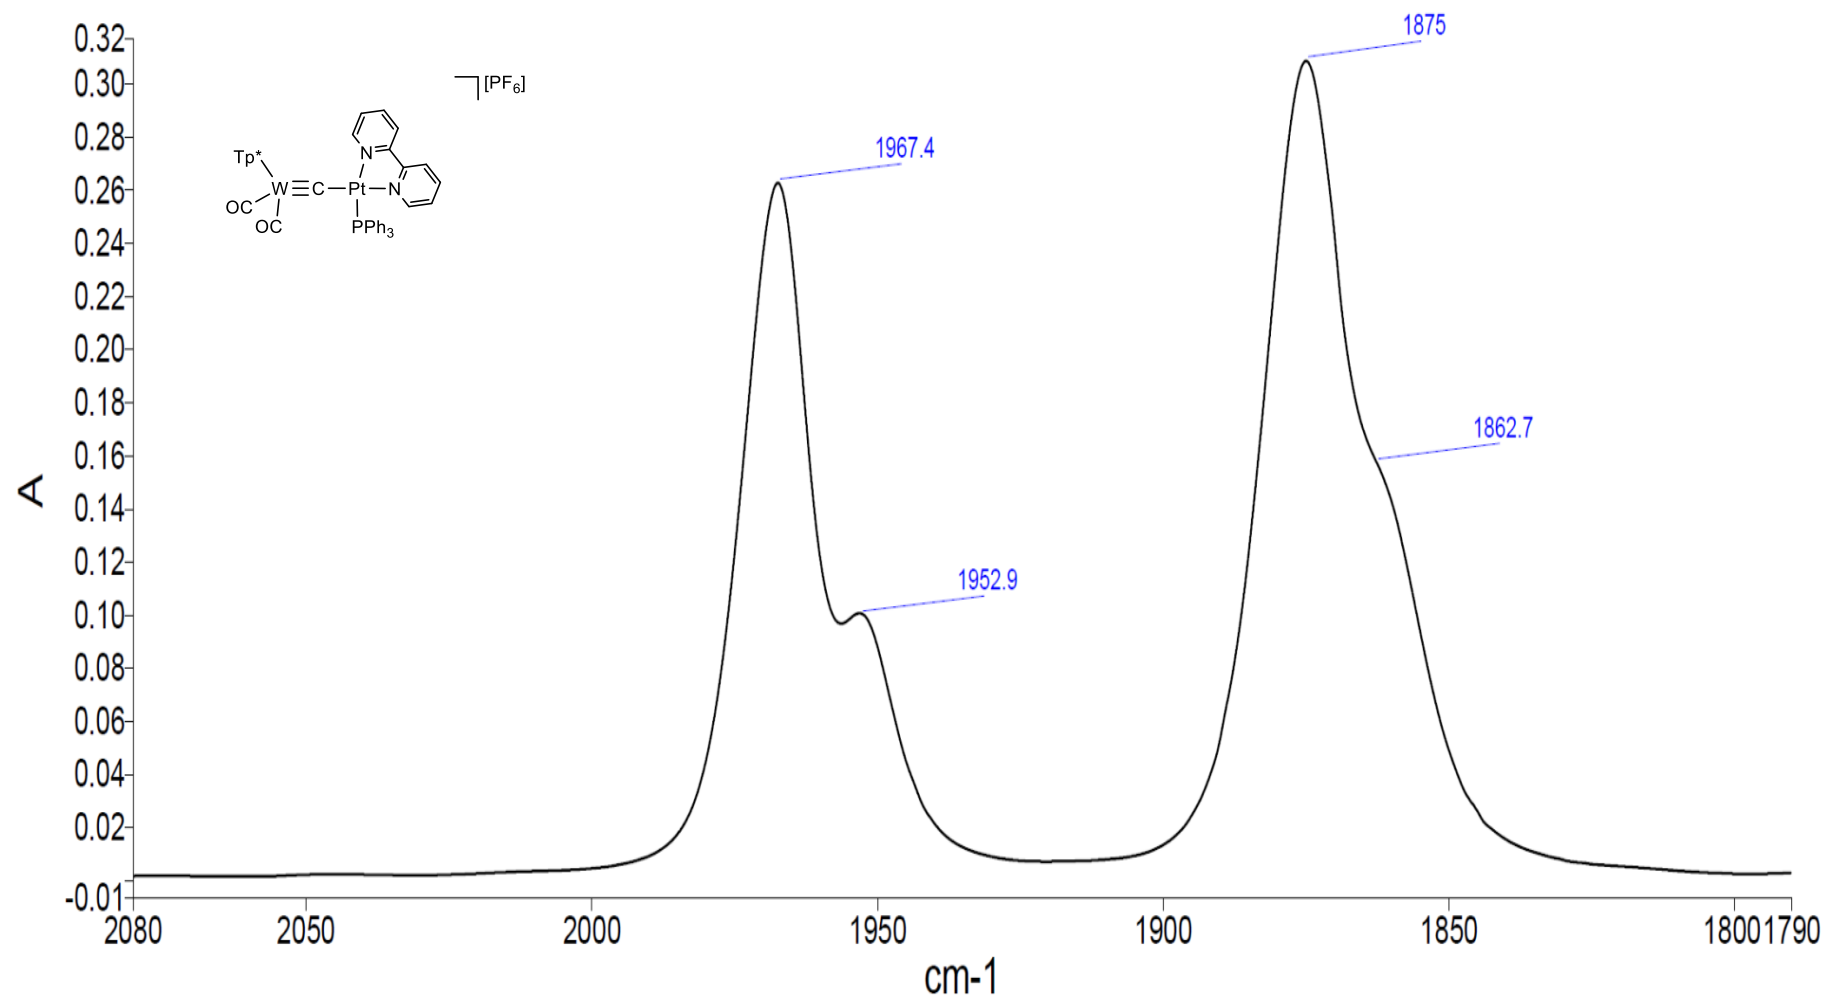

Figure S32: Mass Spectrum of [10a]PF<sub>6</sub> [(Tp\*)(CO)<sub>2</sub>W≡C–Pt(bpy)(PPh<sub>3</sub>)] [PF<sub>6</sub>] (ESI):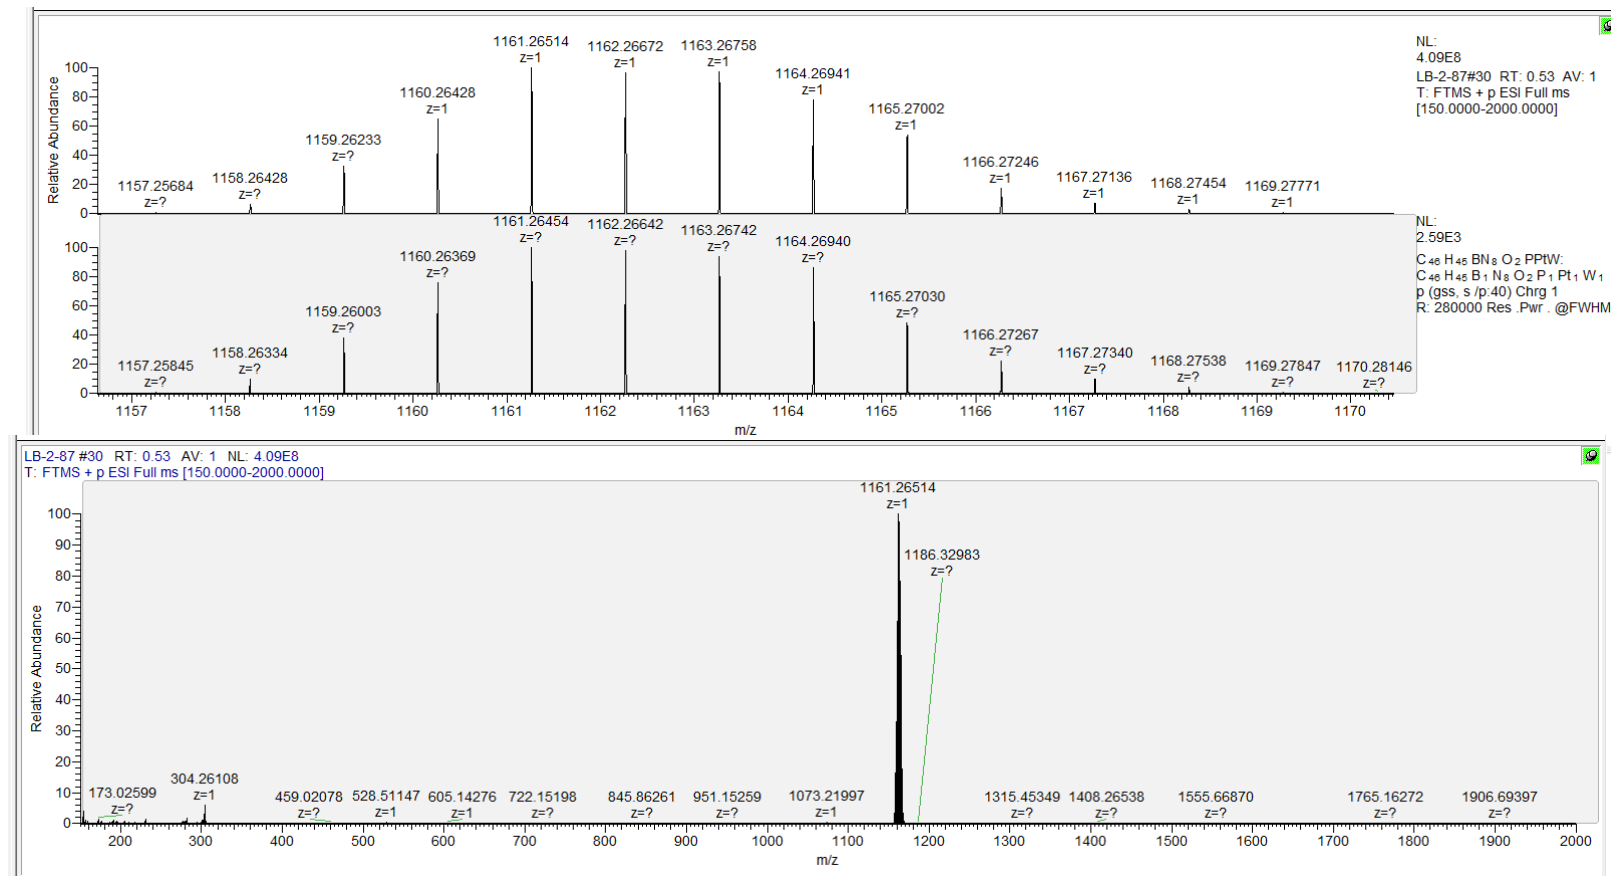



Figure S33:  $^1\text{H}$  NMR Spectrum of  $[\text{10b}]\text{PF}_6$   $[(\text{Tp}^*)(\text{CO})_2\text{W}\equiv\text{C}-\text{Pt}(\text{dtbbpy})(\text{PPh}_3)][\text{PF}_6]$  (400 MHz,  $\text{CDCl}_3$ ,  $25^\circ\text{C}$ ,  $\delta$ ):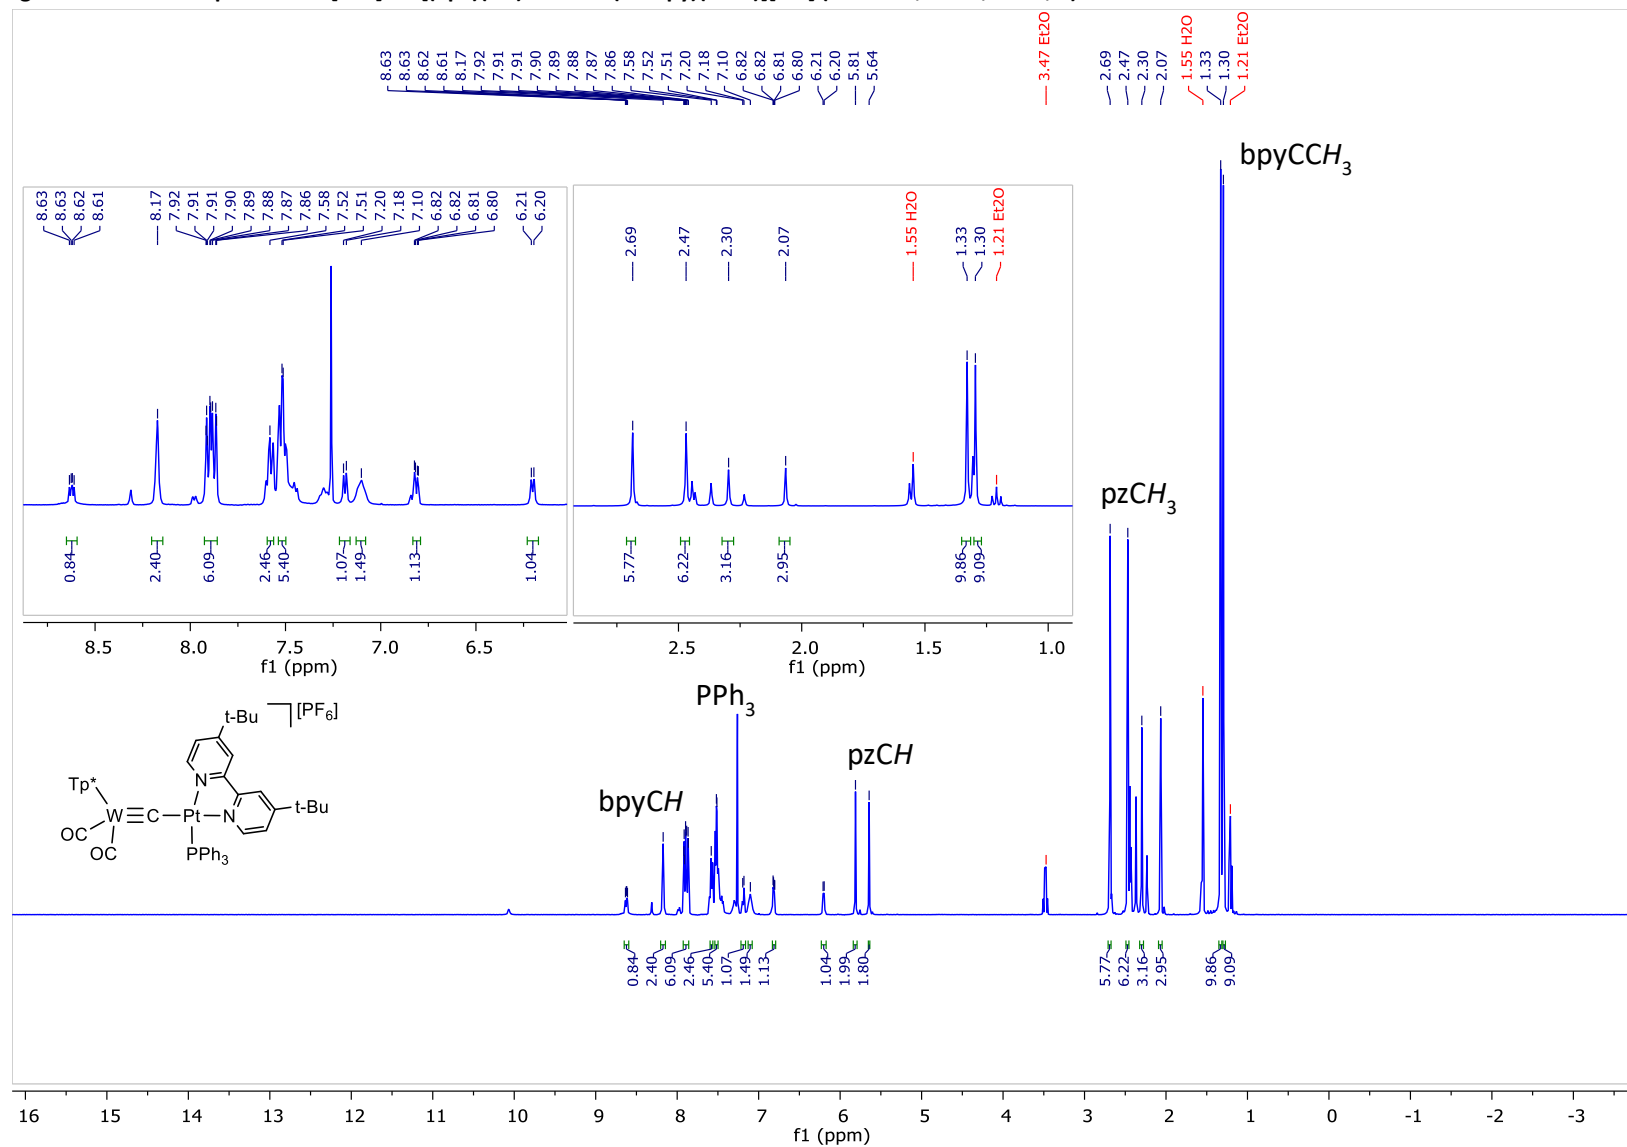

Figure S34:  $^{13}\text{C}\{^1\text{H}\}$  NMR Spectrum of  $[10\text{b}]\text{PF}_6$   $[(\text{Tp}^*)(\text{CO})_2\text{W}\equiv\text{C}-\text{Pt}(\text{dtbbpy})(\text{PPh}_3)][\text{PF}_6]$  (176 MHz,  $\text{CDCl}_3$ , 25 °C,  $\delta$ ):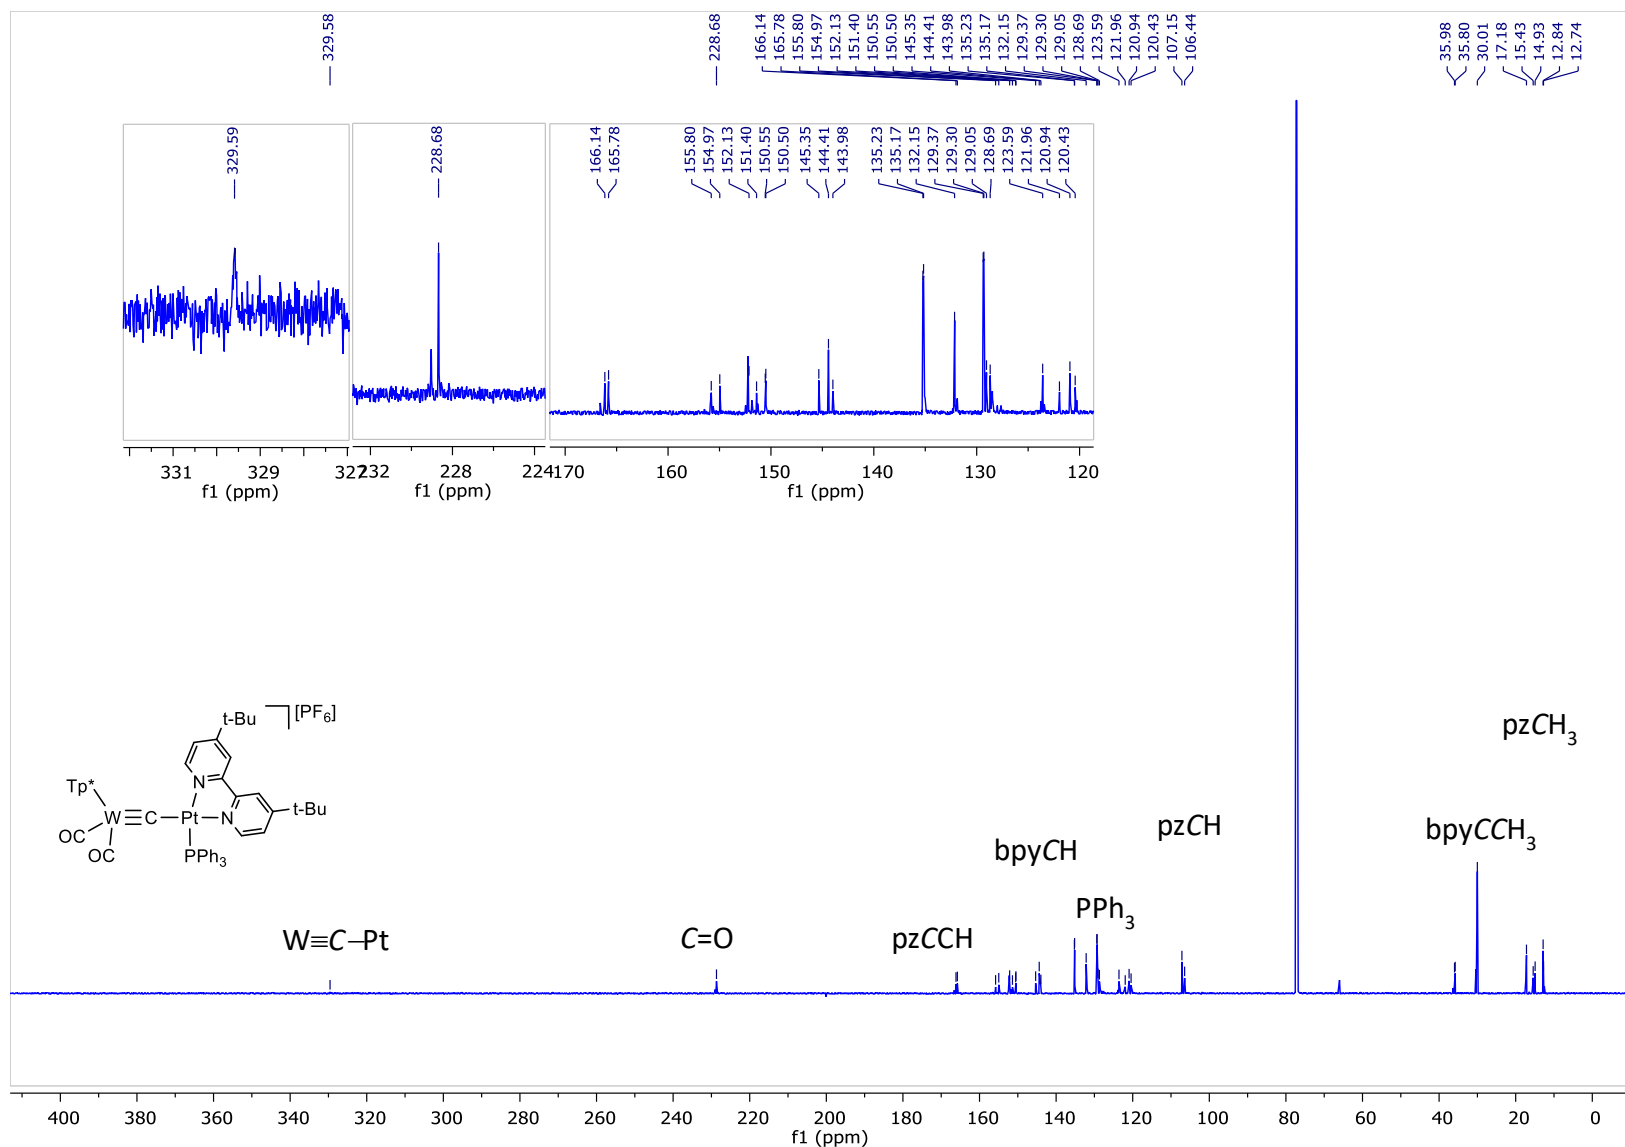

Figure S35:  $^{19}\text{F}\{^1\text{H}\}$  NMR Spectrum of  $[10\text{b}]\text{PF}_6$   $[(\text{Tp}^*)(\text{CO})_2\text{W}\equiv\text{C}-\text{Pt}(\text{dtbbpy})(\text{PPh}_3)][\text{PF}_6]$  (376 MHz,  $\text{CDCl}_3$ , 25 °C,  $\delta$ ):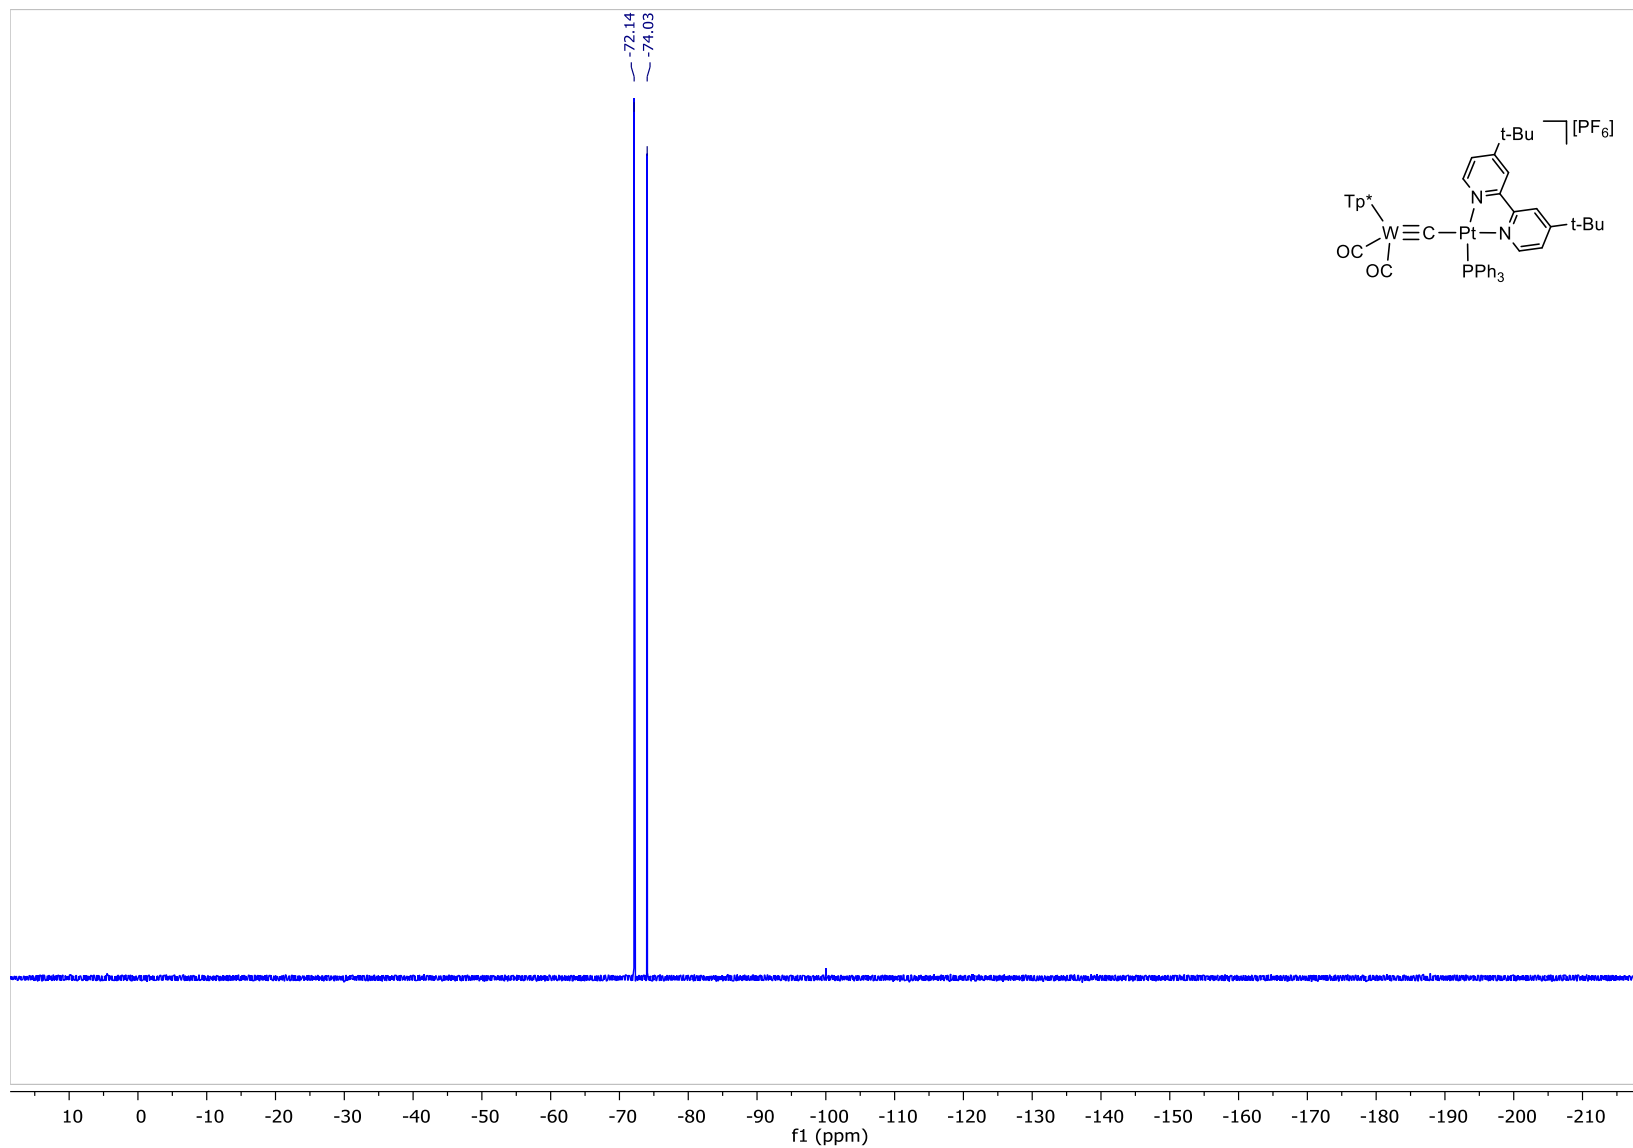

Figure S36:  $^{31}\text{P}\{^1\text{H}\}$  NMR Spectrum of  $[\text{10b}]\text{PF}_6$   $[(\text{Tp}^*)(\text{CO})_2\text{W}\equiv\text{C}-\text{Pt}(\text{dtbbpy})(\text{PPh}_3)][\text{PF}_6]$  (162 MHz,  $\text{CDCl}_3$ , 25 °C,  $\delta$ ):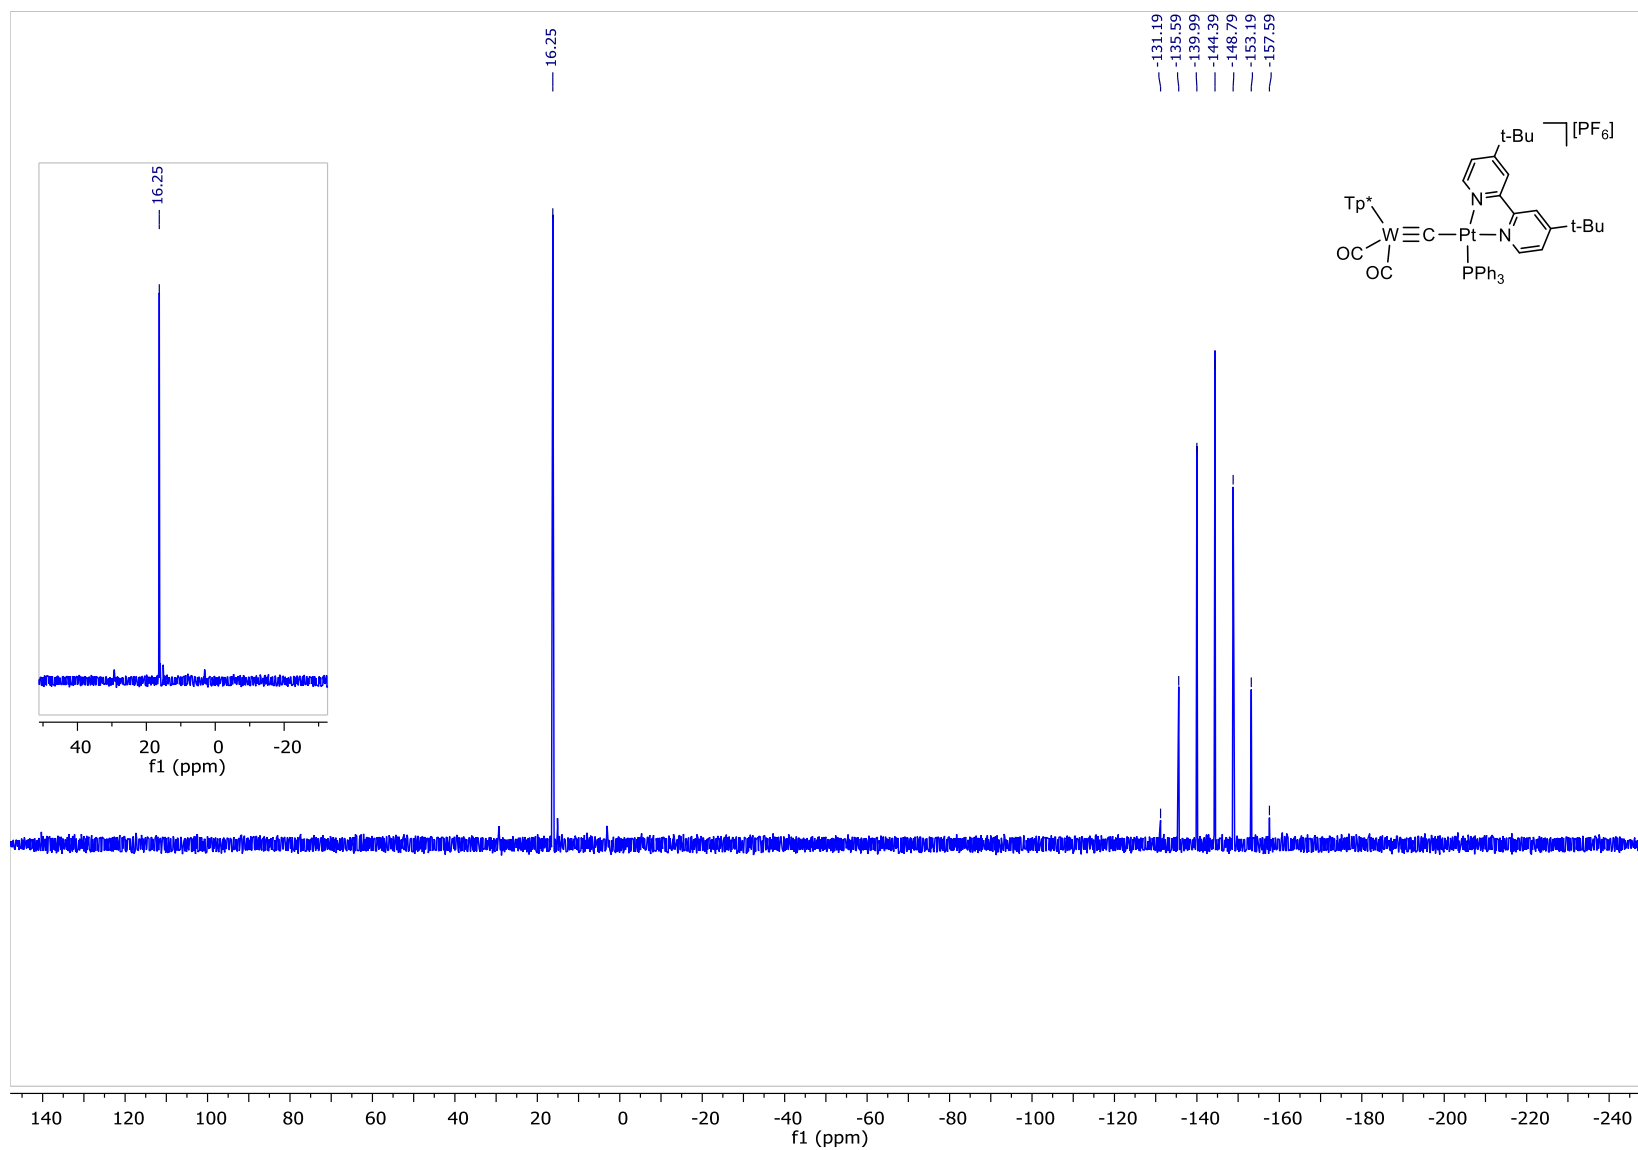

Figure S37:  $^{195}\text{Pt}\{^1\text{H}\}$  NMR Spectrum of  $[\mathbf{10b}]\text{PF}_6$   $[(\text{Tp}^*)(\text{CO})_2\text{W}\equiv\text{C}-\text{Pt}(\text{dtbbpy})(\text{PPh}_3)][\text{PF}_6]$  (86 MHz,  $\text{CDCl}_3$ , 25 °C,  $\delta$ ):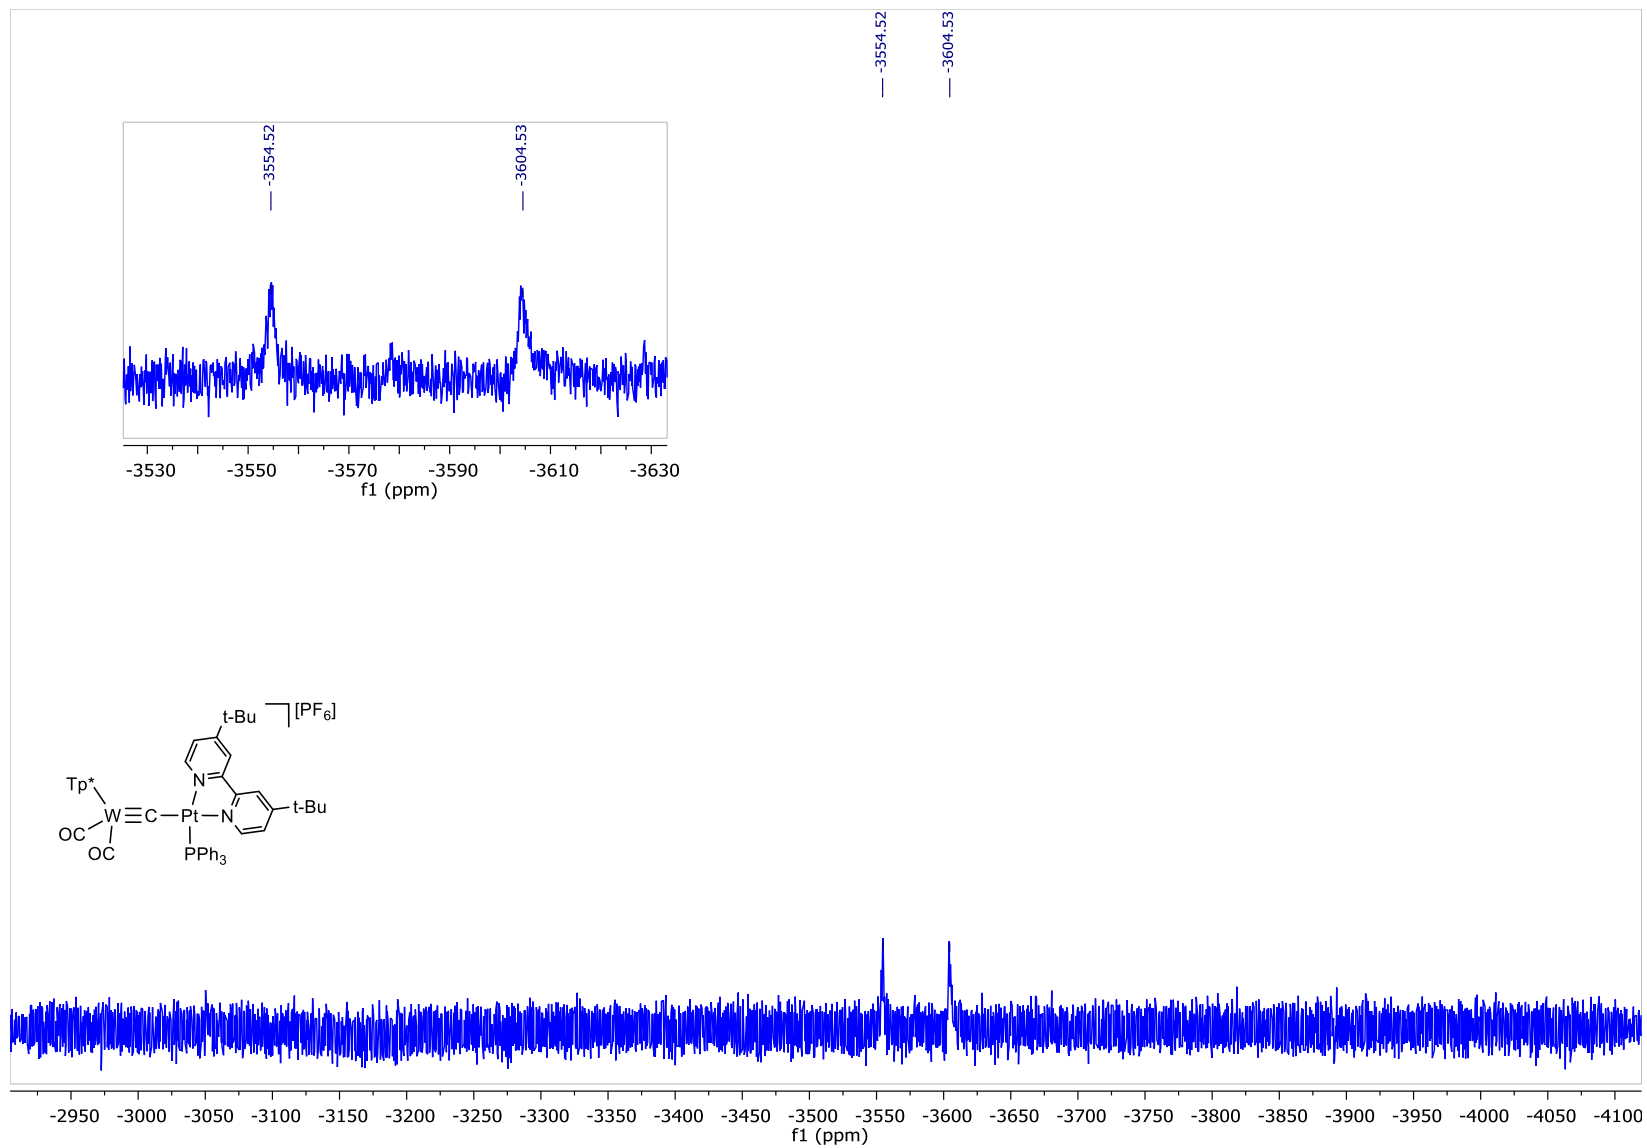

Figure S38:  $^1\text{H}$  NMR Spectrum of (11)  $[(\text{Tp}^*)(\text{CO})_2\text{W}\equiv\text{C}-\text{Pt}(\text{Bp}^*)(\text{PPh}_3)]$  (400 MHz,  $\text{CDCl}_3$ , 25  $^\circ\text{C}$ ,  $\delta$ ):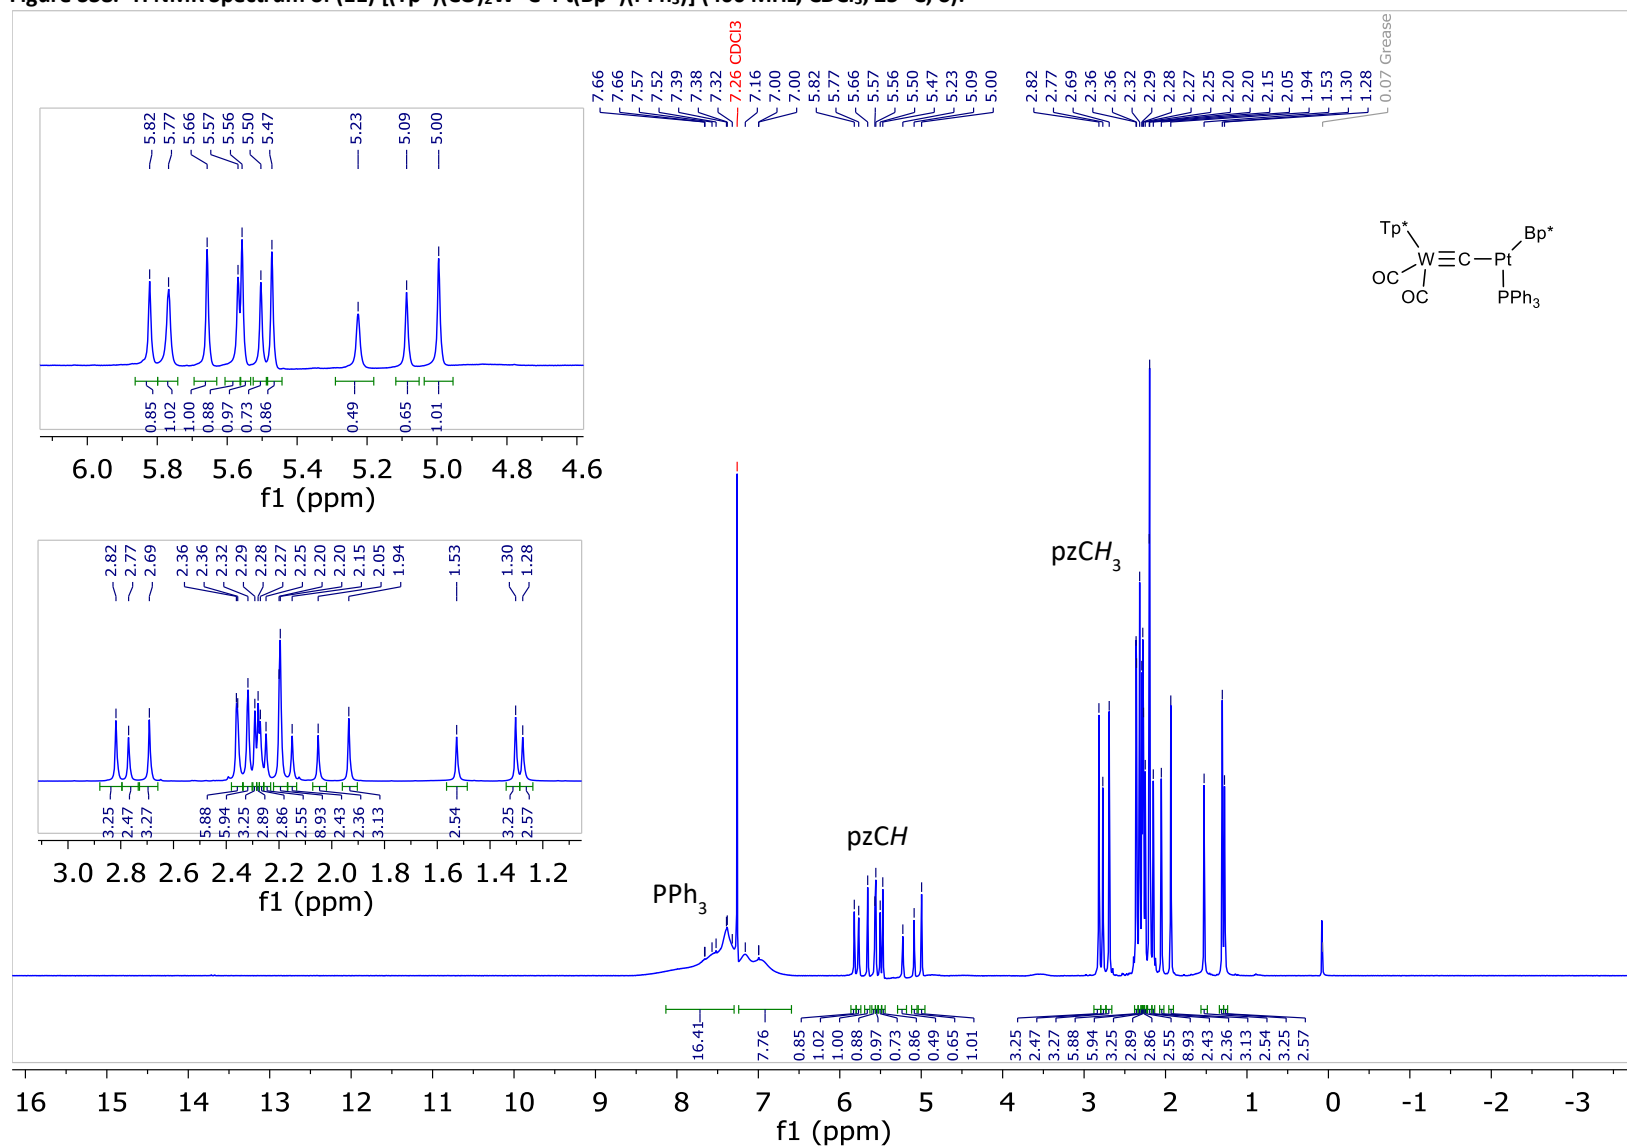

Figure S39:  $^{13}\text{C}\{^1\text{H}\}$  NMR Spectrum of (11)  $[(\text{Tp}^*)(\text{CO})_2\text{W}\equiv\text{C}-\text{Pt}(\text{Bp}^*)(\text{PPh}_3)]$  (151 MHz,  $\text{CDCl}_3$ , 25 °C,  $\delta$ ):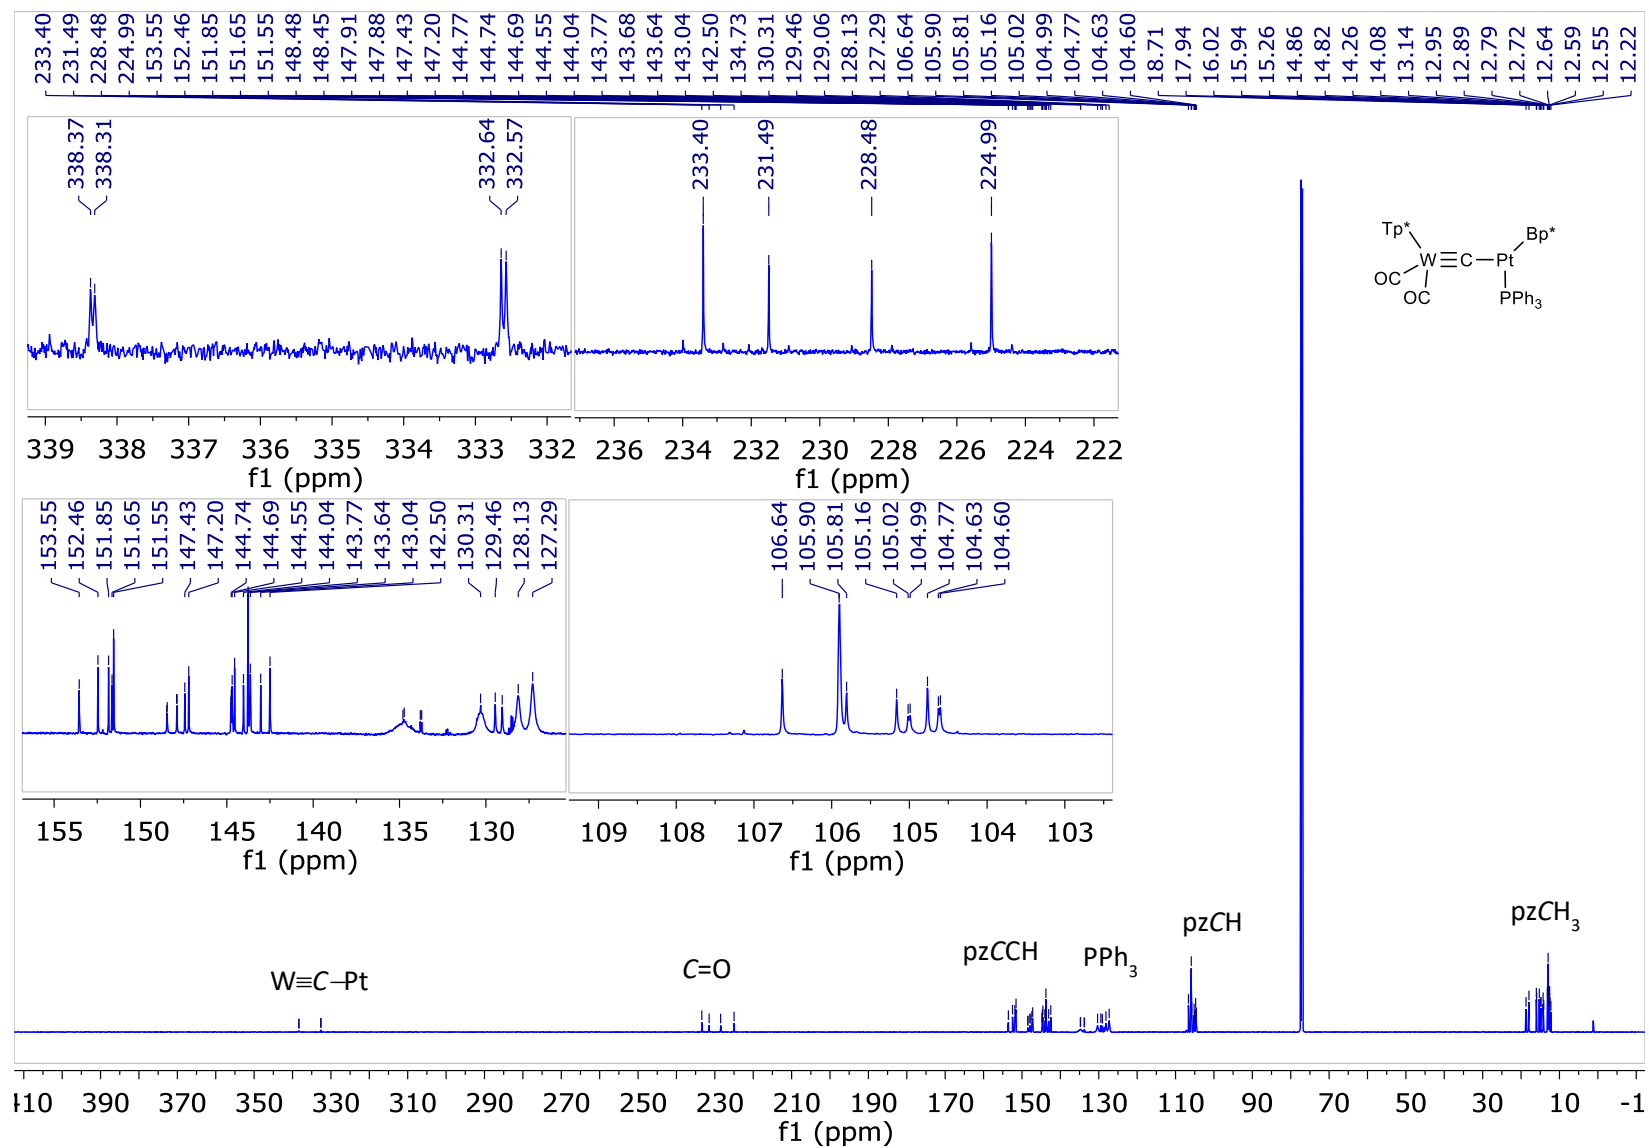

Figure S40:  $^{31}\text{P}\{^1\text{H}\}$  NMR Spectrum of (11)  $[(\text{Tp}^*)(\text{CO})_2\text{W}\equiv\text{C}-\text{Pt}(\text{Bp}^*)(\text{PPh}_3)]$  (283 MHz,  $\text{CDCl}_3$ , 25 °C,  $\delta$ ):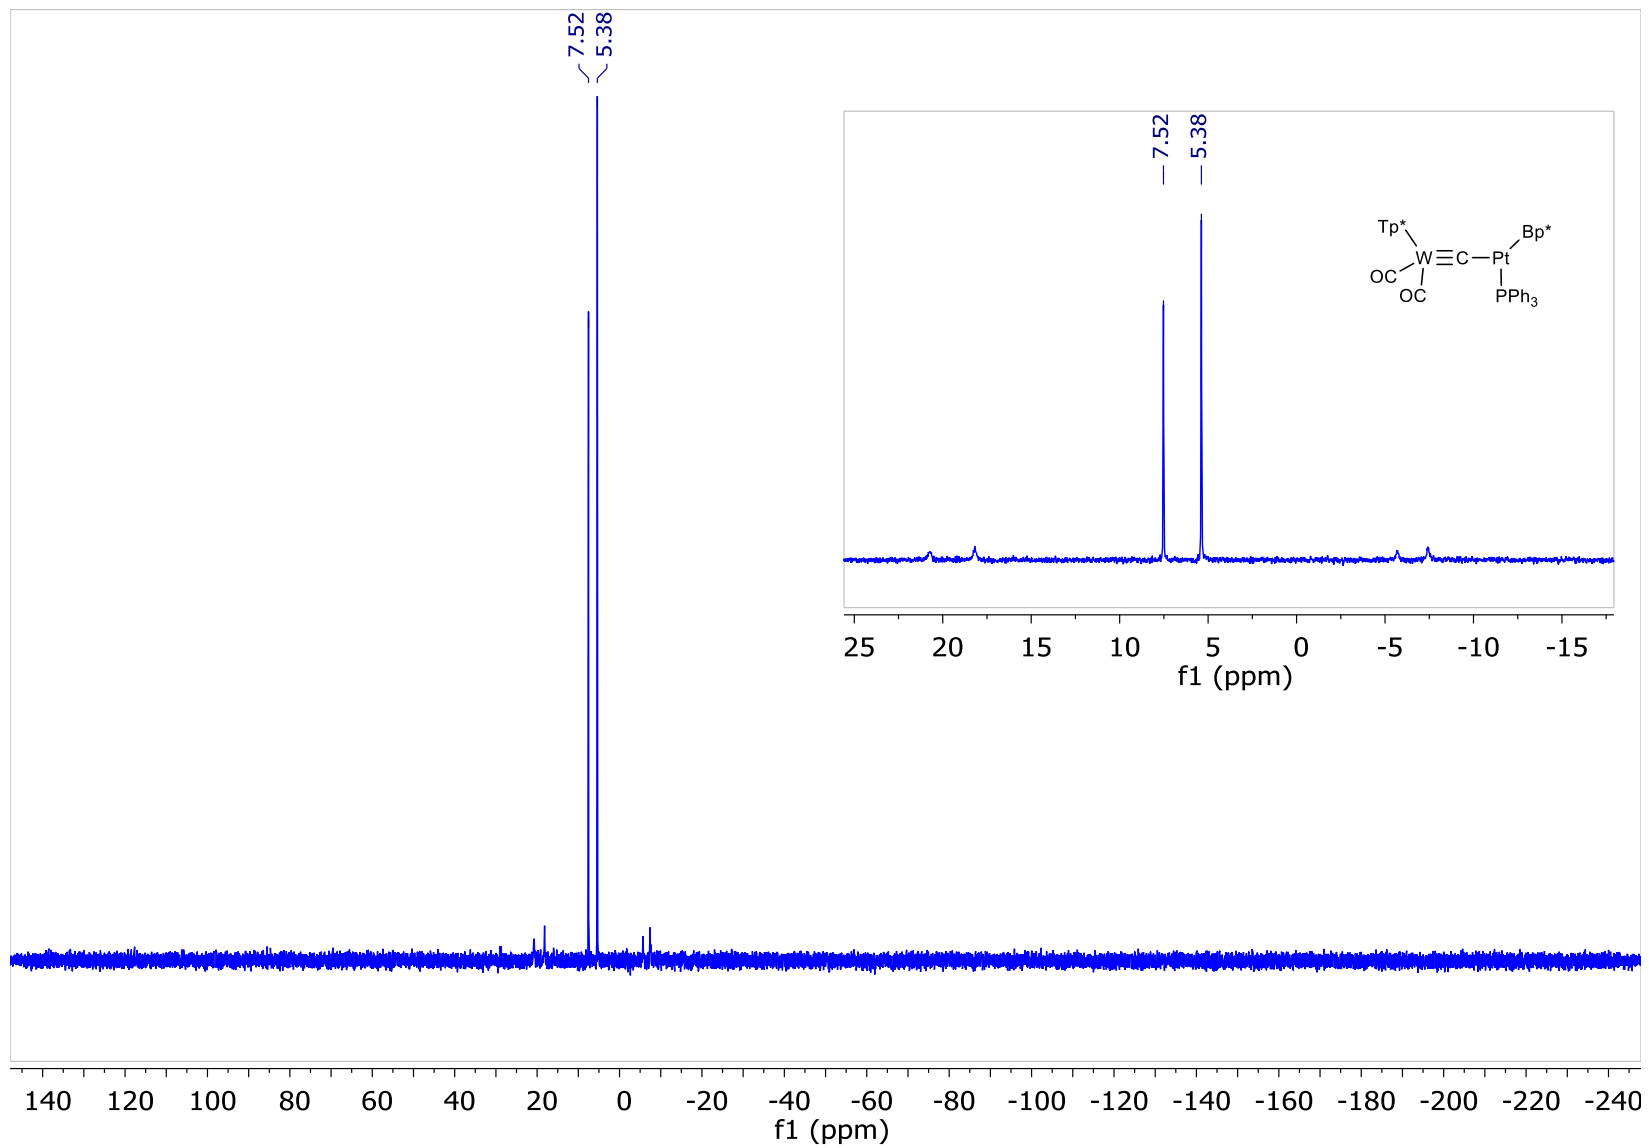



**Figure S41:**  $^{195}\text{Pt}\{^1\text{H}\}$  NMR Spectrum of (11)  $[(\text{Tp}^*)(\text{CO})_2\text{W}\equiv\text{C}-\text{Pt}(\text{Bp}^*)(\text{PPh}_3)]$  (283 MHz,  $\text{CDCl}_3$ , 25 °C,  $\delta$ ):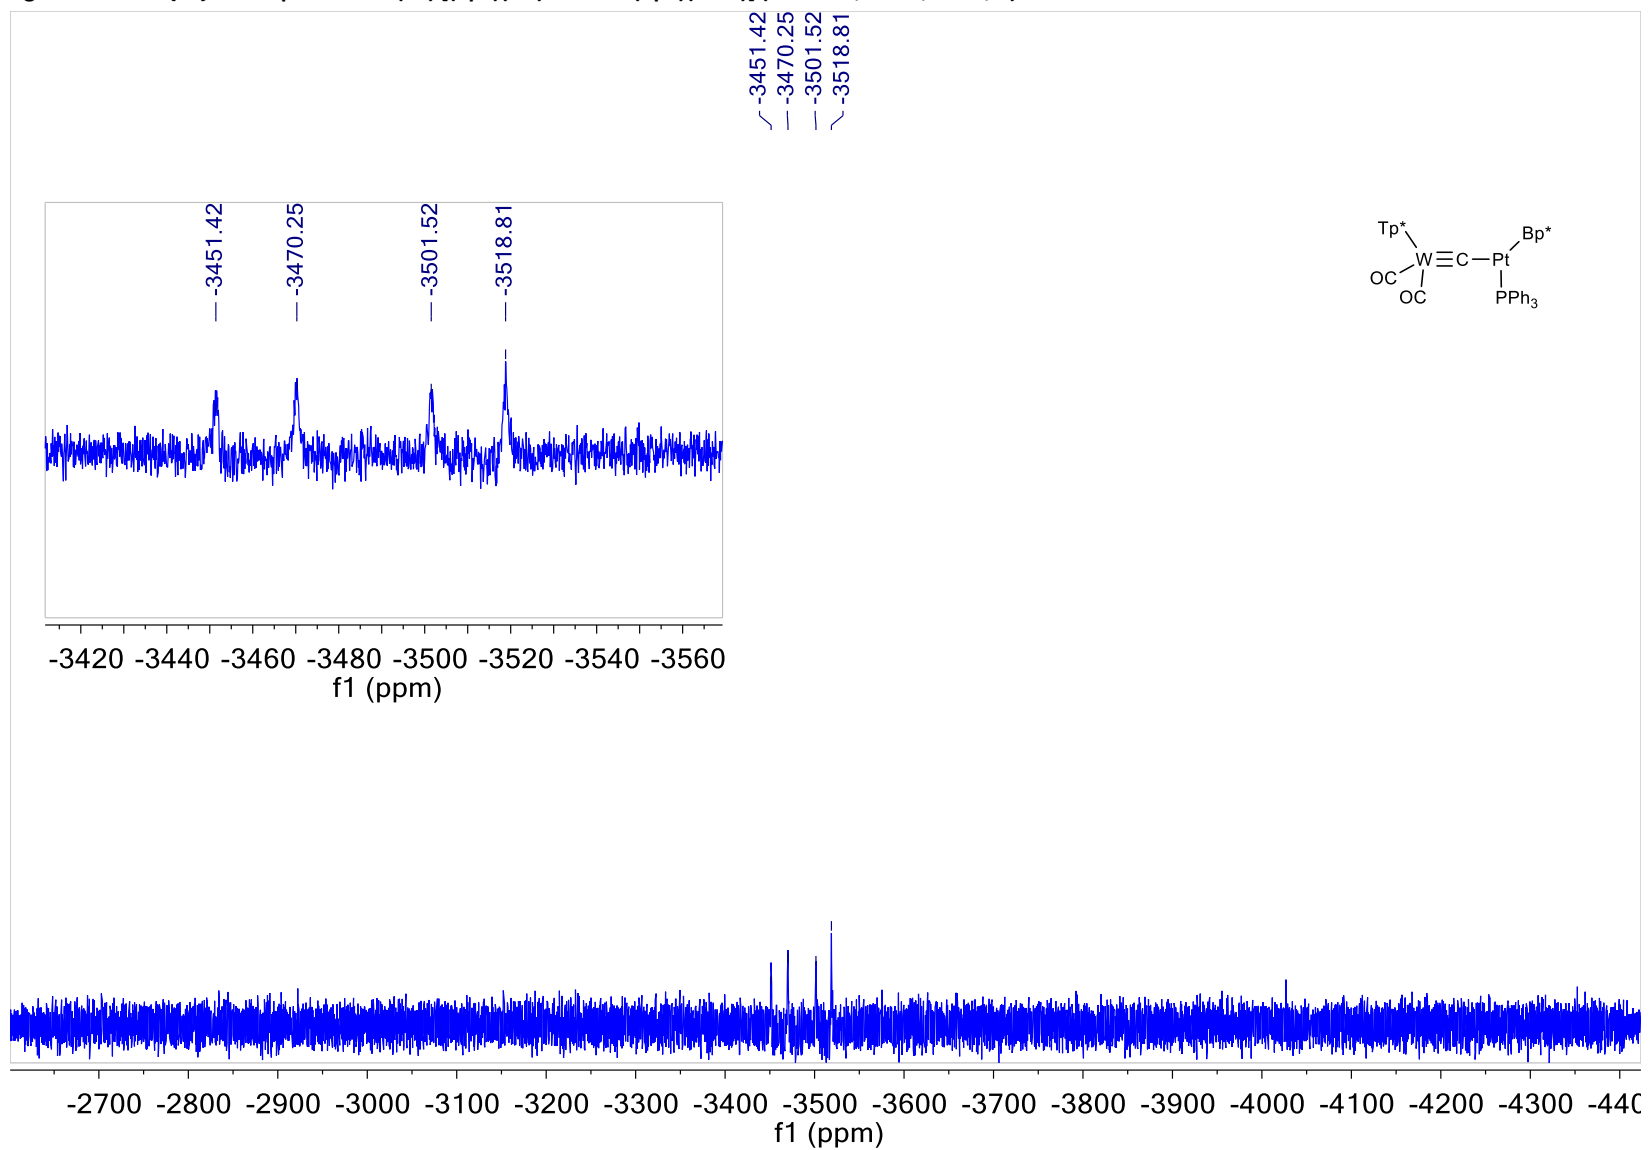

Figure S42: Infrared Spectrum of (11)  $[(Tp^*)(CO)_2W\equiv C-Pt(Bp^*)(PPh_3)]$  ( $CH_2Cl_2$ , 25 °C,  $\nu$ ):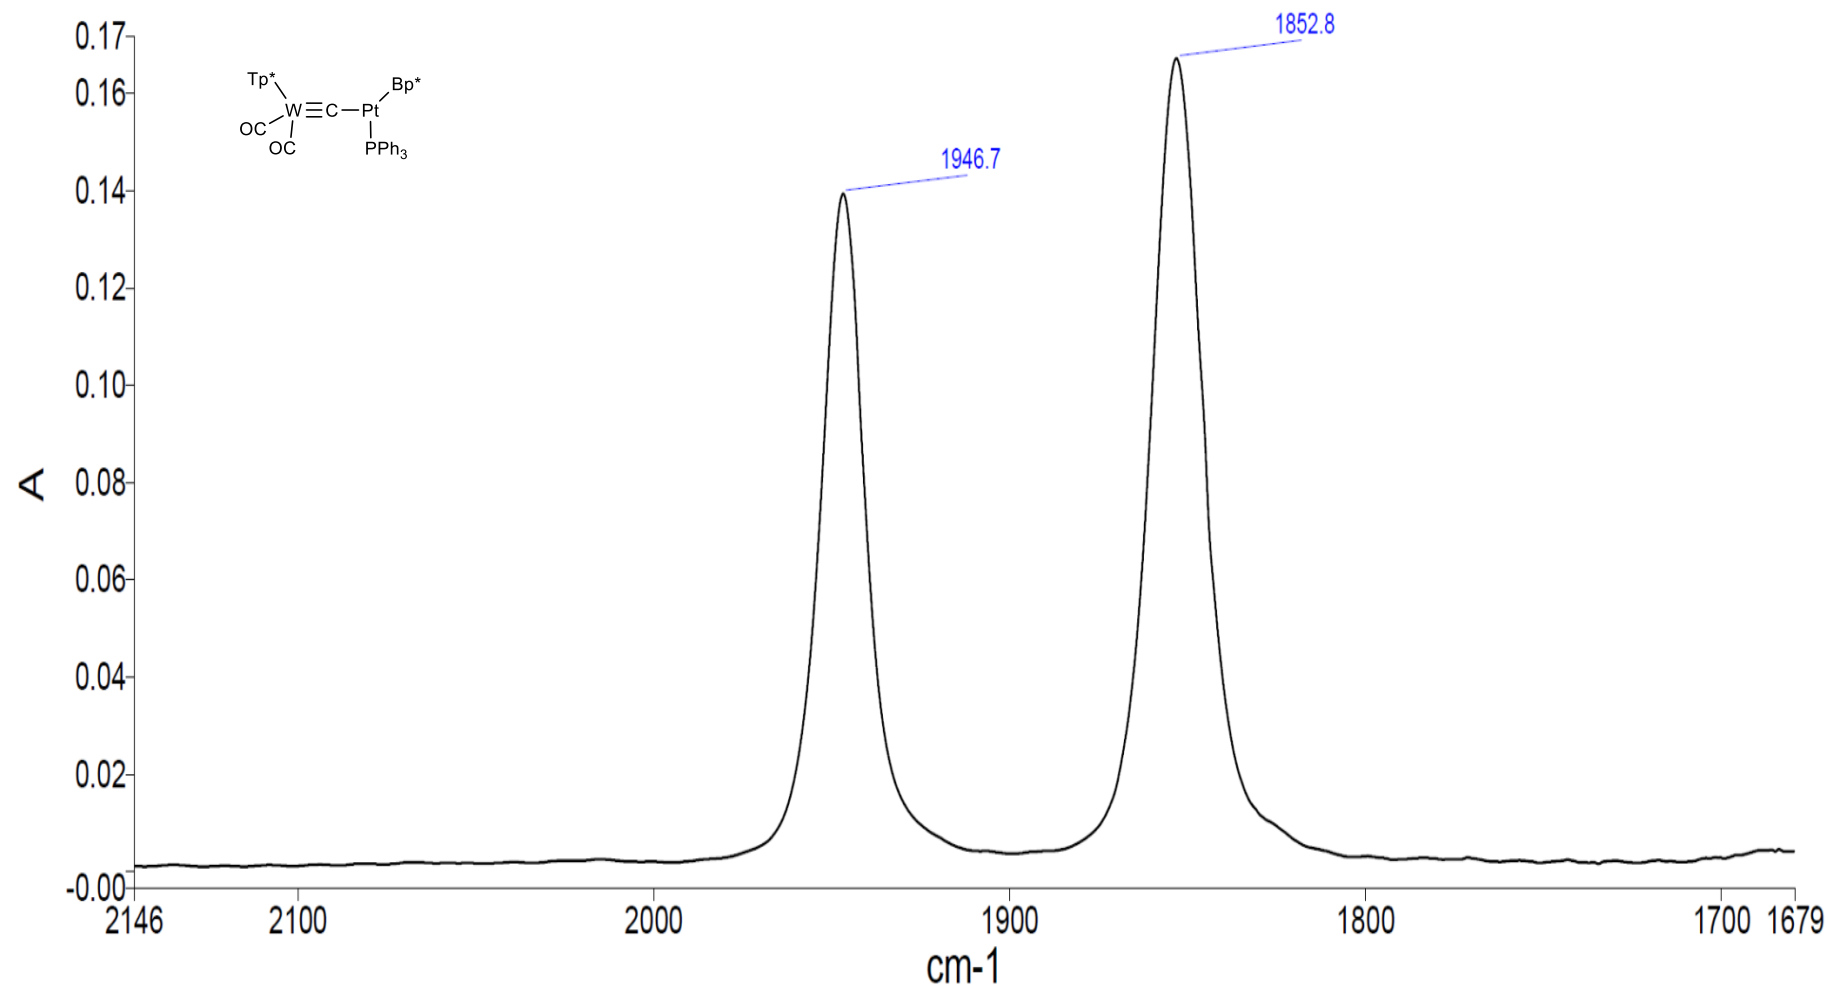

Figure S43:  $^1\text{H}$  NMR Spectrum of (12)  $[(\text{Tp}^*)(\text{CO})_2\text{W}\equiv\text{C}-\text{Pt}(\kappa\text{-Tp}^*)(\text{PPh}_3)]$  (400 MHz,  $\text{CDCl}_3$ , 25  $^\circ\text{C}$ ,  $\delta$ ):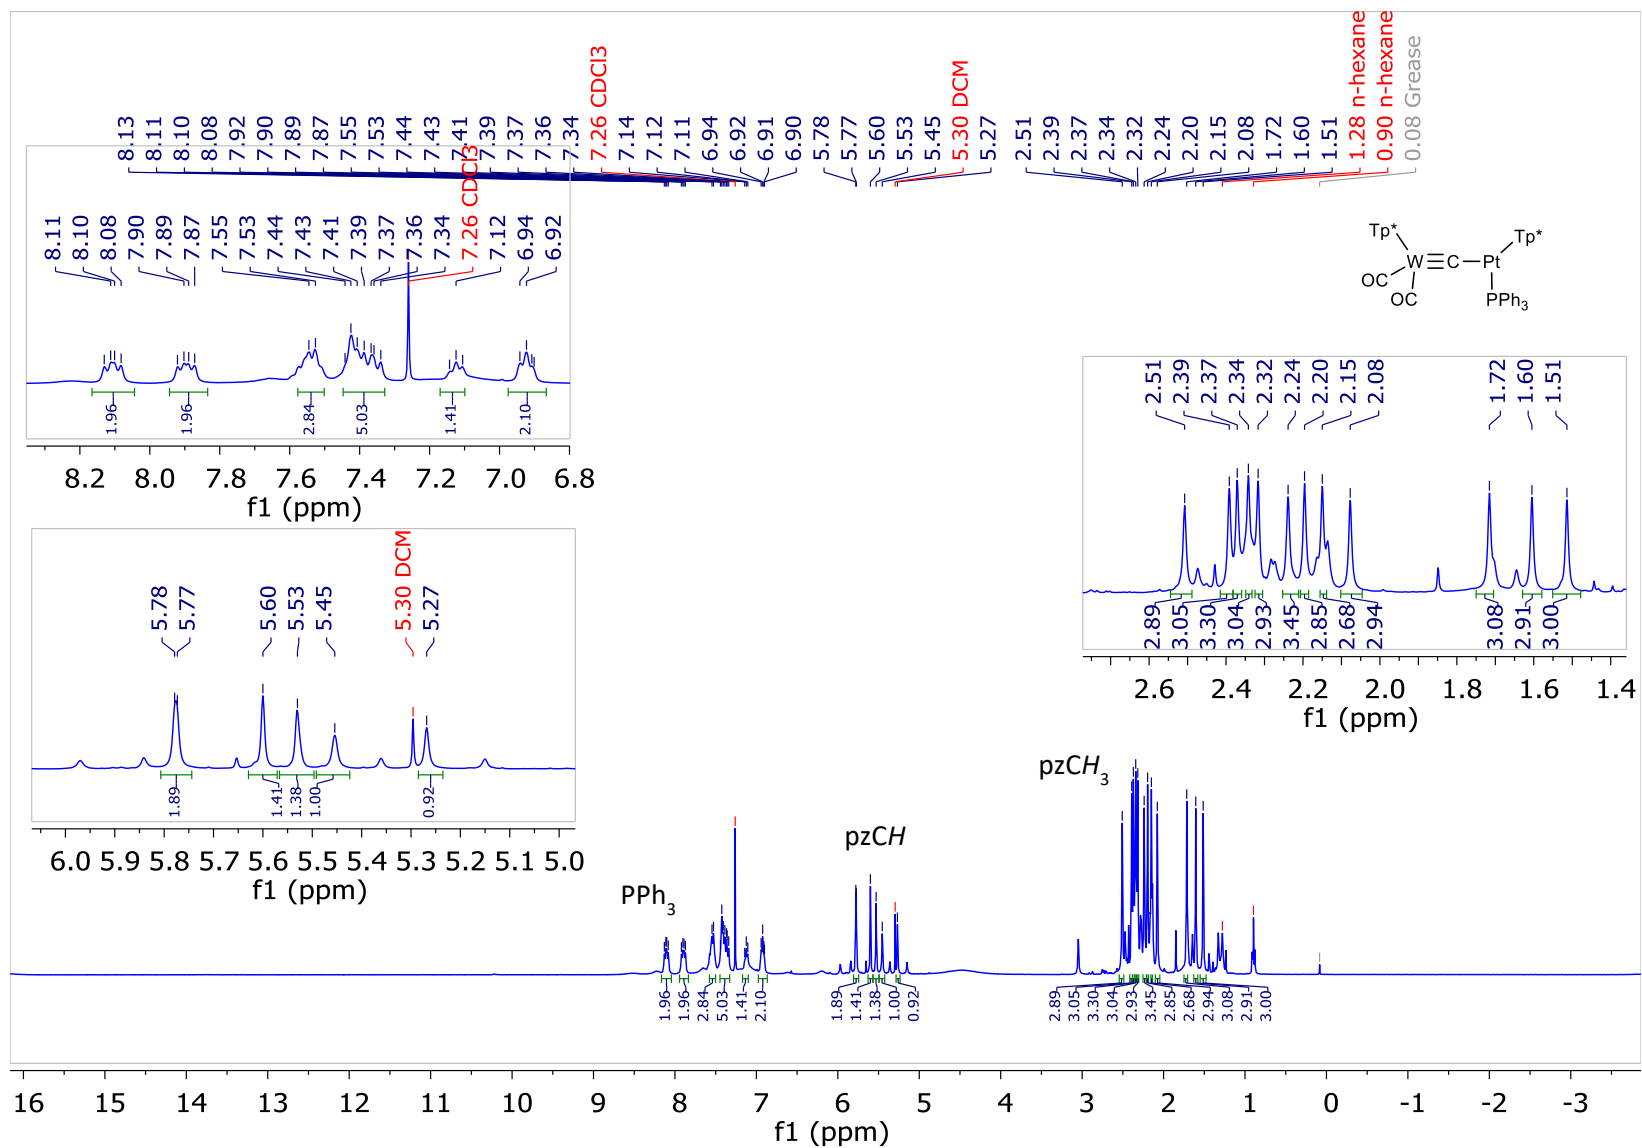

Figure S44:  $^{13}\text{C}\{^1\text{H}\}$  NMR Spectrum of (12)  $[(\text{Tp}^*)(\text{CO})_2\text{W}\equiv\text{C}-\text{Pt}(\kappa_2\text{-Tp}^*)(\text{PPh}_3)]$  (151 MHz,  $\text{CDCl}_3$ , 25 °C,  $\delta$ ):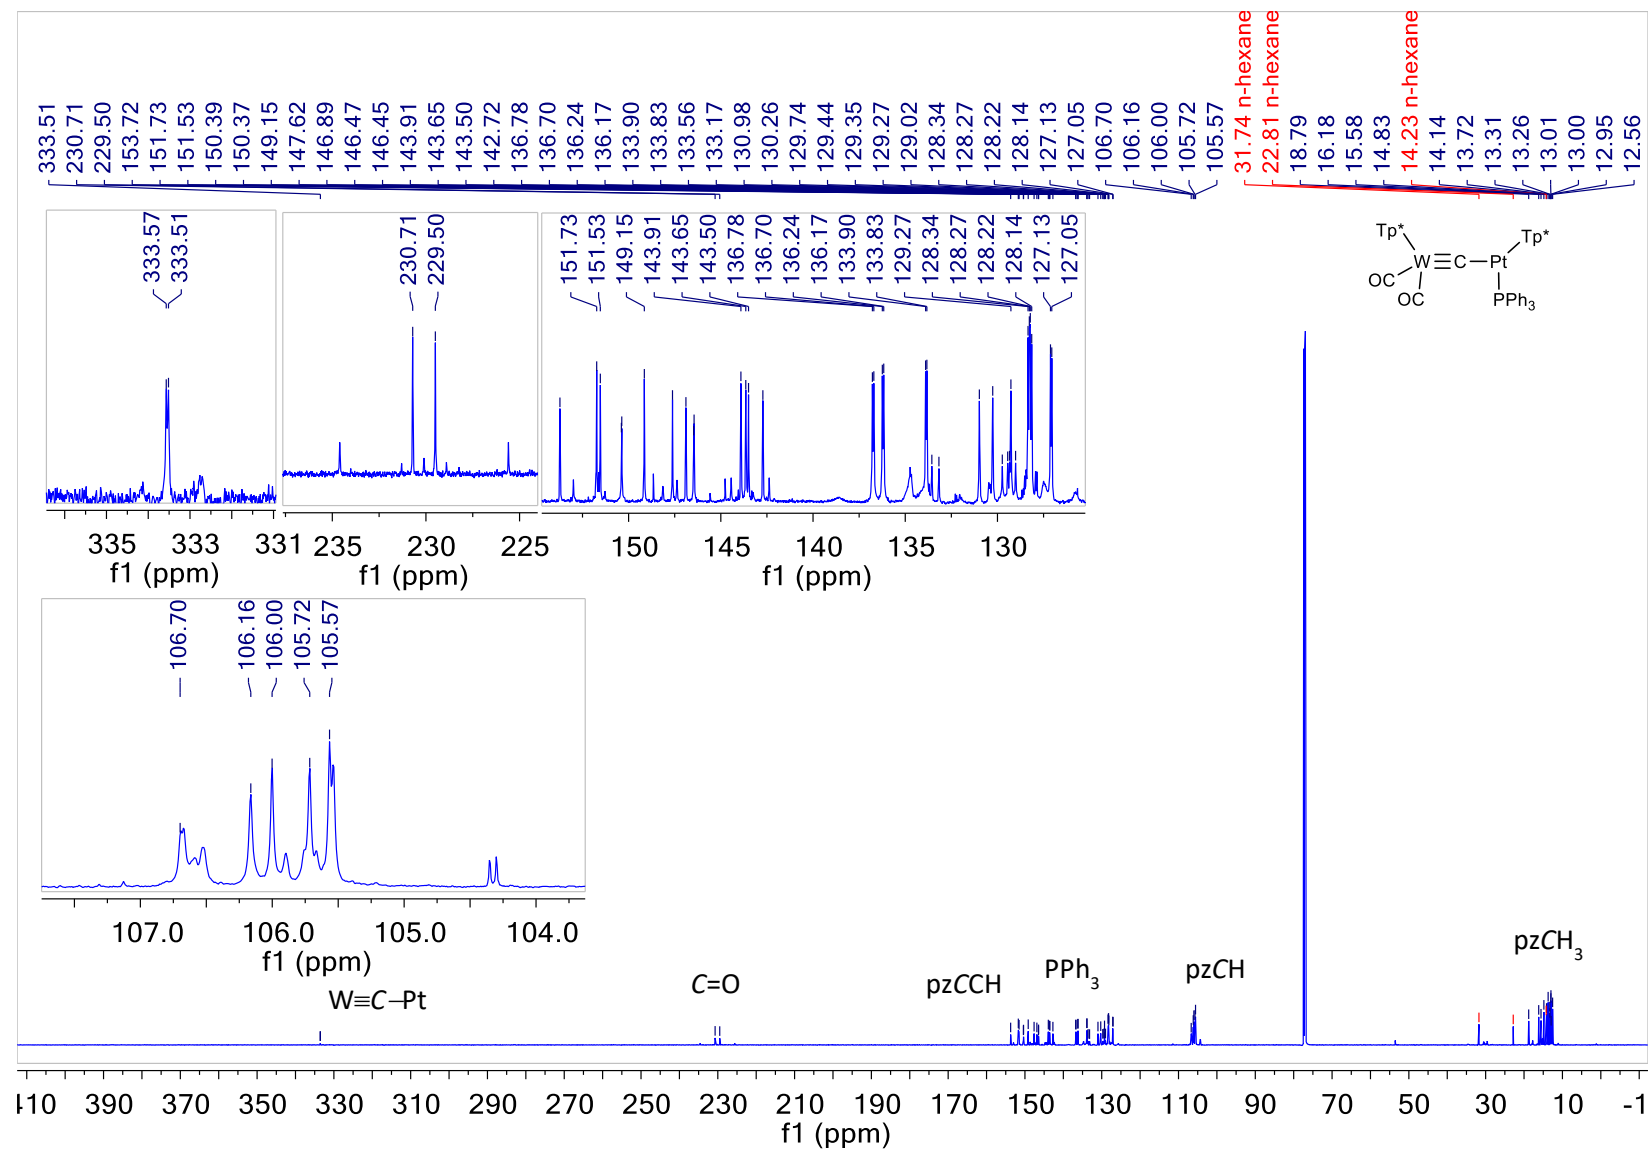

**Figure S45:**  $^{31}\text{P}\{^1\text{H}\}$  NMR Spectrum of (12)  $[(\text{Tp}^*)(\text{CO})_2\text{W}\equiv\text{C}-\text{Pt}(\kappa_2\text{-Tp}^*)(\text{PPh}_3)]$  (162 MHz,  $\text{CDCl}_3$ , 25 °C,  $\delta$ ):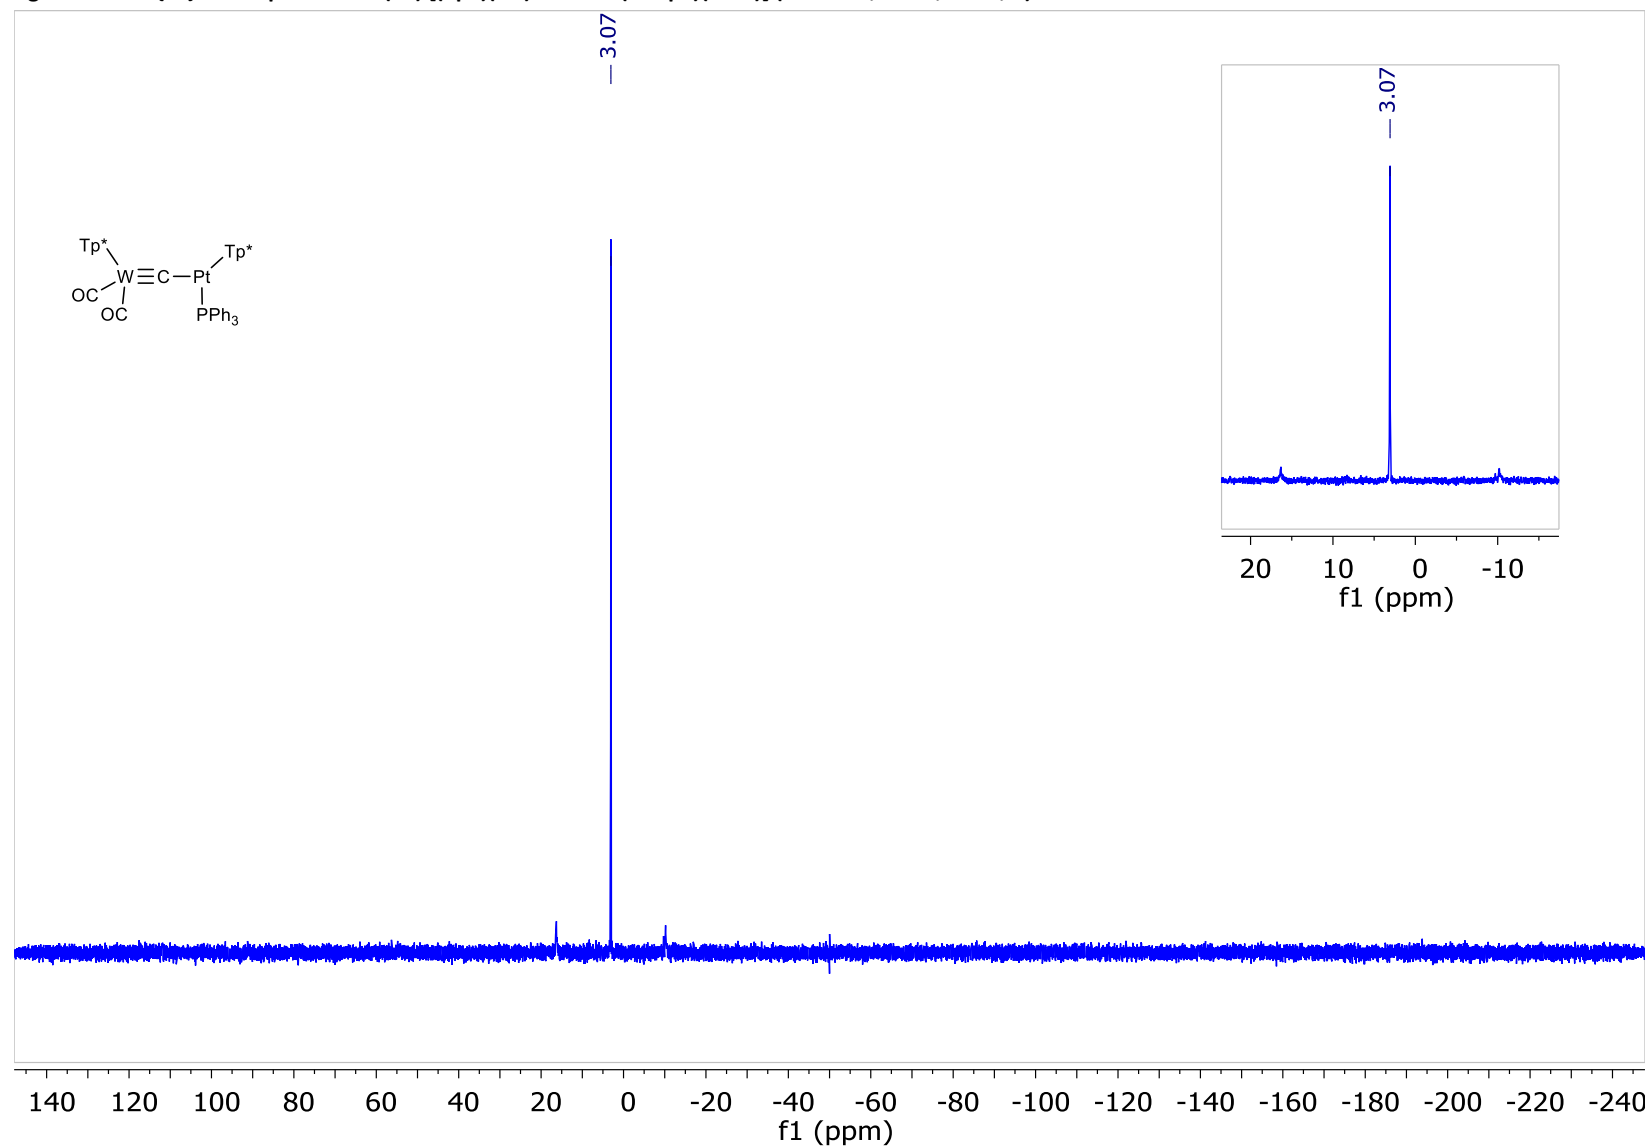

Figure S46:  $^{195}\text{Pt}\{^1\text{H}\}$  NMR Spectrum of (12)  $[(\text{Tp}^*)(\text{CO})_2\text{W}\equiv\text{C}-\text{Pt}(\kappa_2\text{-Tp}^*)(\text{PPh}_3)]$  (86 MHz,  $\text{CDCl}_3$ , 25 °C,  $\delta$ ):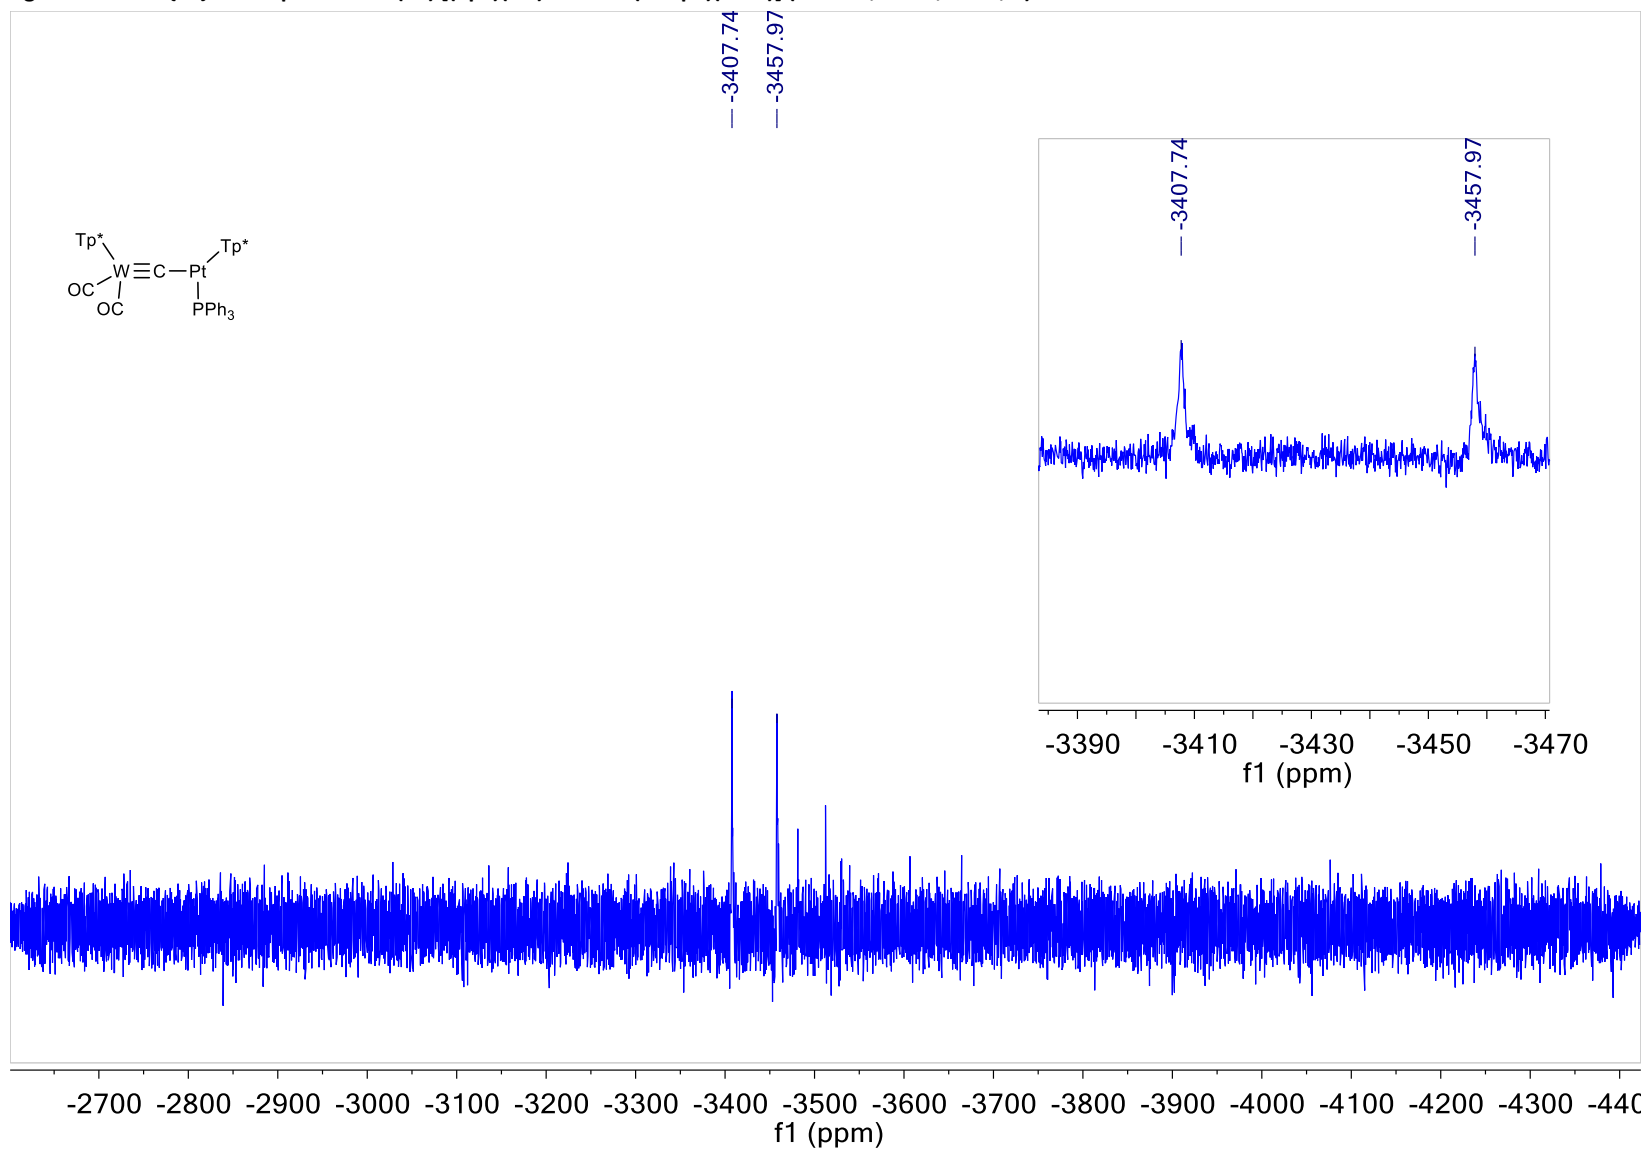

**Figure S47: Infrared Spectrum of (12) [(Tp\*)(CO)<sub>2</sub>W≡C–Pt(κ<sub>2</sub>-Tp\*)(PPh<sub>3</sub>)] (CH<sub>2</sub>Cl<sub>2</sub>, 25 °C, ν):**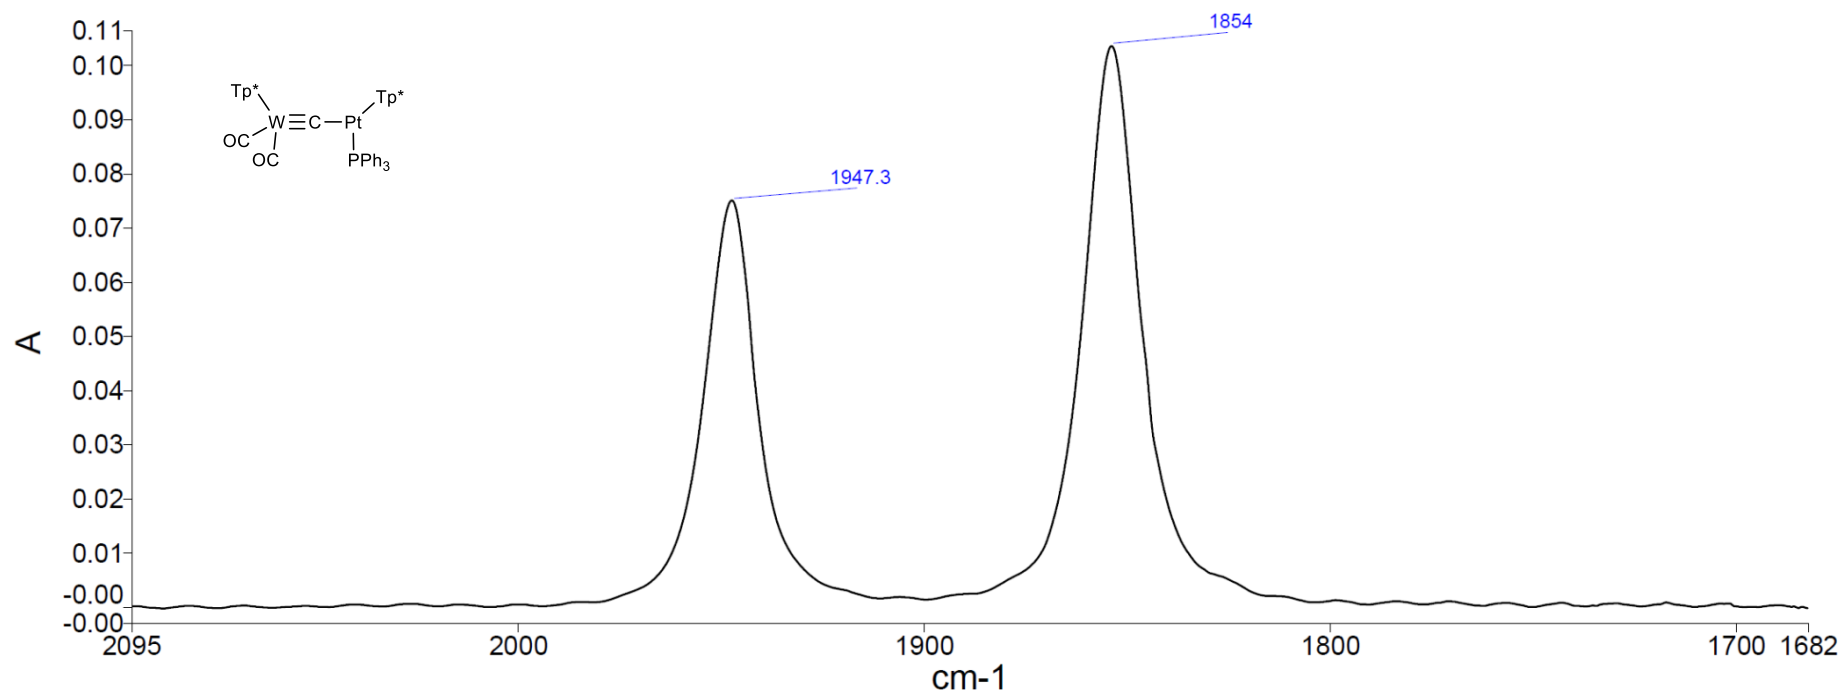

Figure S48: Mass Spectrum of (12)  $[(Tp^*)(CO)_2W=C-Pt(\kappa_2-Tp^*)(PPh_3)]$  (ESI):**Single Mass Analysis**

Tolerance = 3.0 PPM / DBE: min = -1.5, max = 32.0

Element prediction: Off

Number of isotope peaks used for i-FIT = 3

Monoisotopic Mass, Odd and Even Electron Ions

1198 formula(e) evaluated with 1 results within limits (up to 50 closest results for each mass)

Elements Used:

C: 0-55 H: 0-60 11B: 0-2 N: 0-15 O: 0-2 P: 0-1 184W: 0-1 195Pt: 0-1

LB-2-32-AJ

63815

0293 6 (0.317) Cm (2:10)

KE375  
LCT Premier

24-May-2019,9:4:7

1: TOF MS ES+  
1.15e+005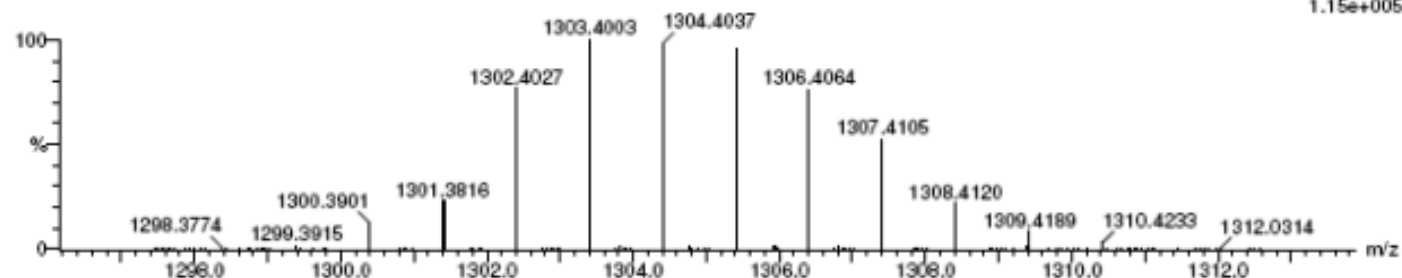

Minimum:

Maximum: 5.0 3.0 -1.5

| Mass      | Calc. Mass | $\Delta$ Da | PPM  | DBE  | i-FIT   | Formula                          |
|-----------|------------|-------------|------|------|---------|----------------------------------|
| 1304.4037 | 1304.4043  | -0.6        | -0.5 | 32.0 | 26501.1 | C51 H60 11B2 N12 O2 P 184W 195Pt |



Figure S49:  $^1\text{H}$  NMR Spectrum of (13)  $[(\text{Tp}^*)\text{W}\equiv\text{C}-\text{Pt}(\text{Bm}^{\text{Me}})(\text{PPh}_3)]$  (400 MHz,  $\text{CDCl}_3$ , 25  $^\circ\text{C}$ ,  $\delta$ ):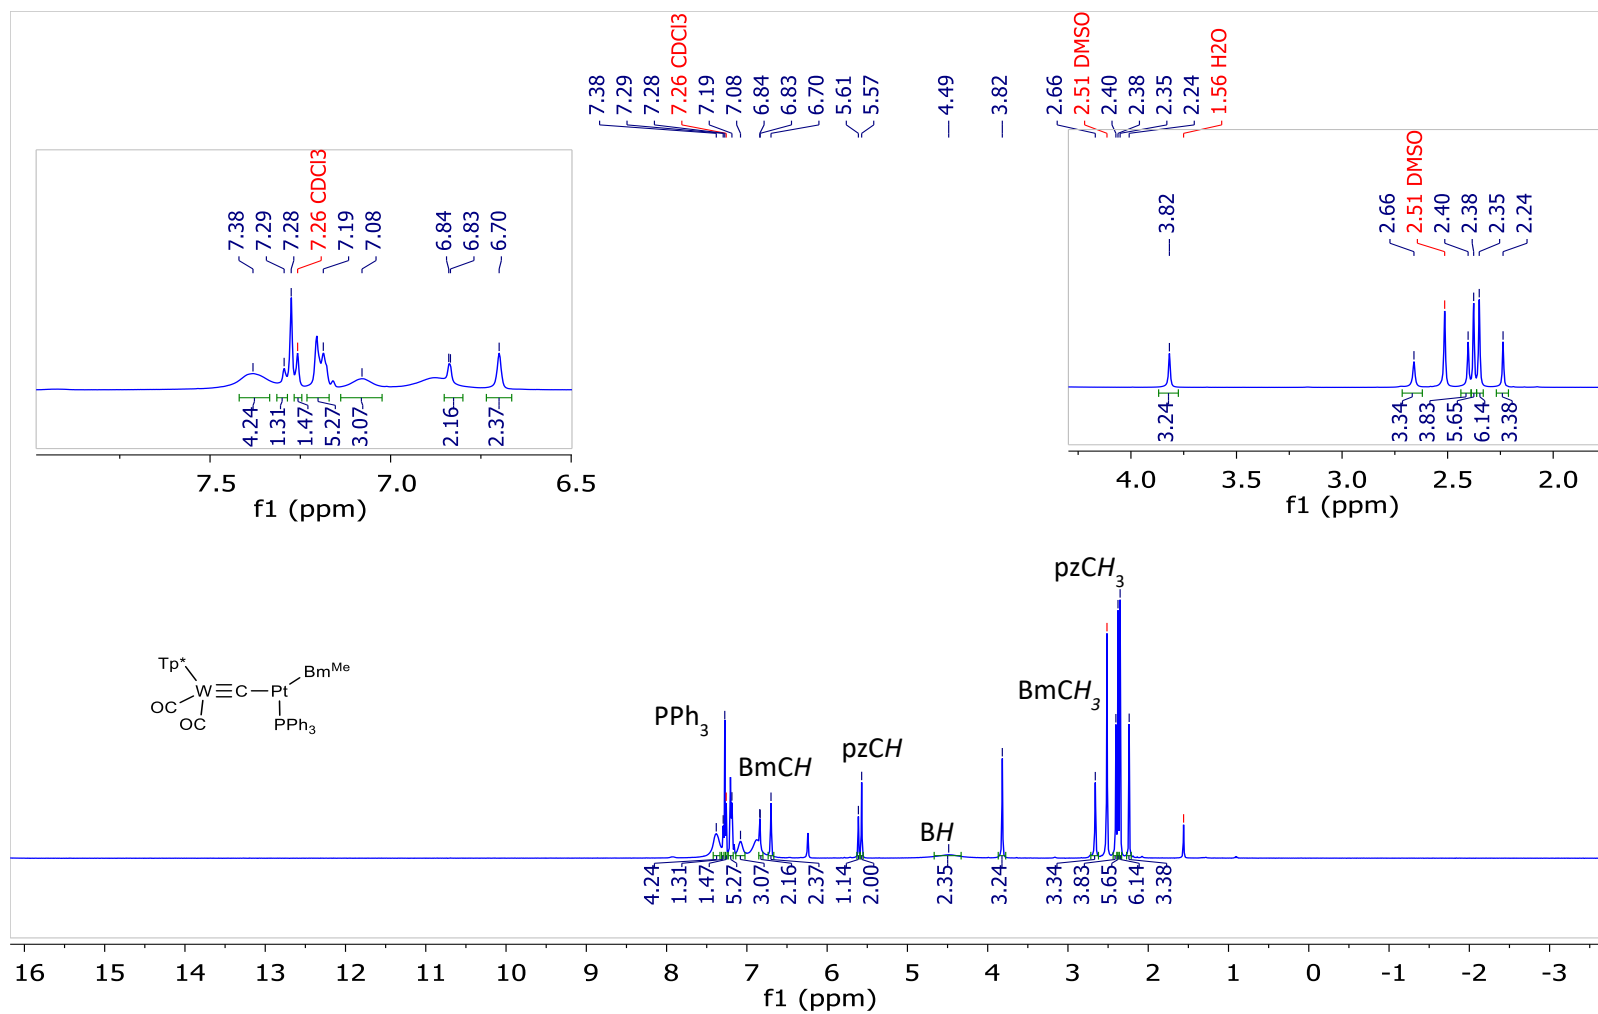

Figure S50:  $^{13}\text{C}\{^1\text{H}\}$  NMR Spectrum of (13)  $[(\text{Tp}^*)\text{W}\equiv\text{C}-\text{Pt}(\text{Bm}^{\text{Me}})(\text{PPh}_3)]$  (151 MHz,  $\text{CDCl}_3$ , 25 °C,  $\delta$ ):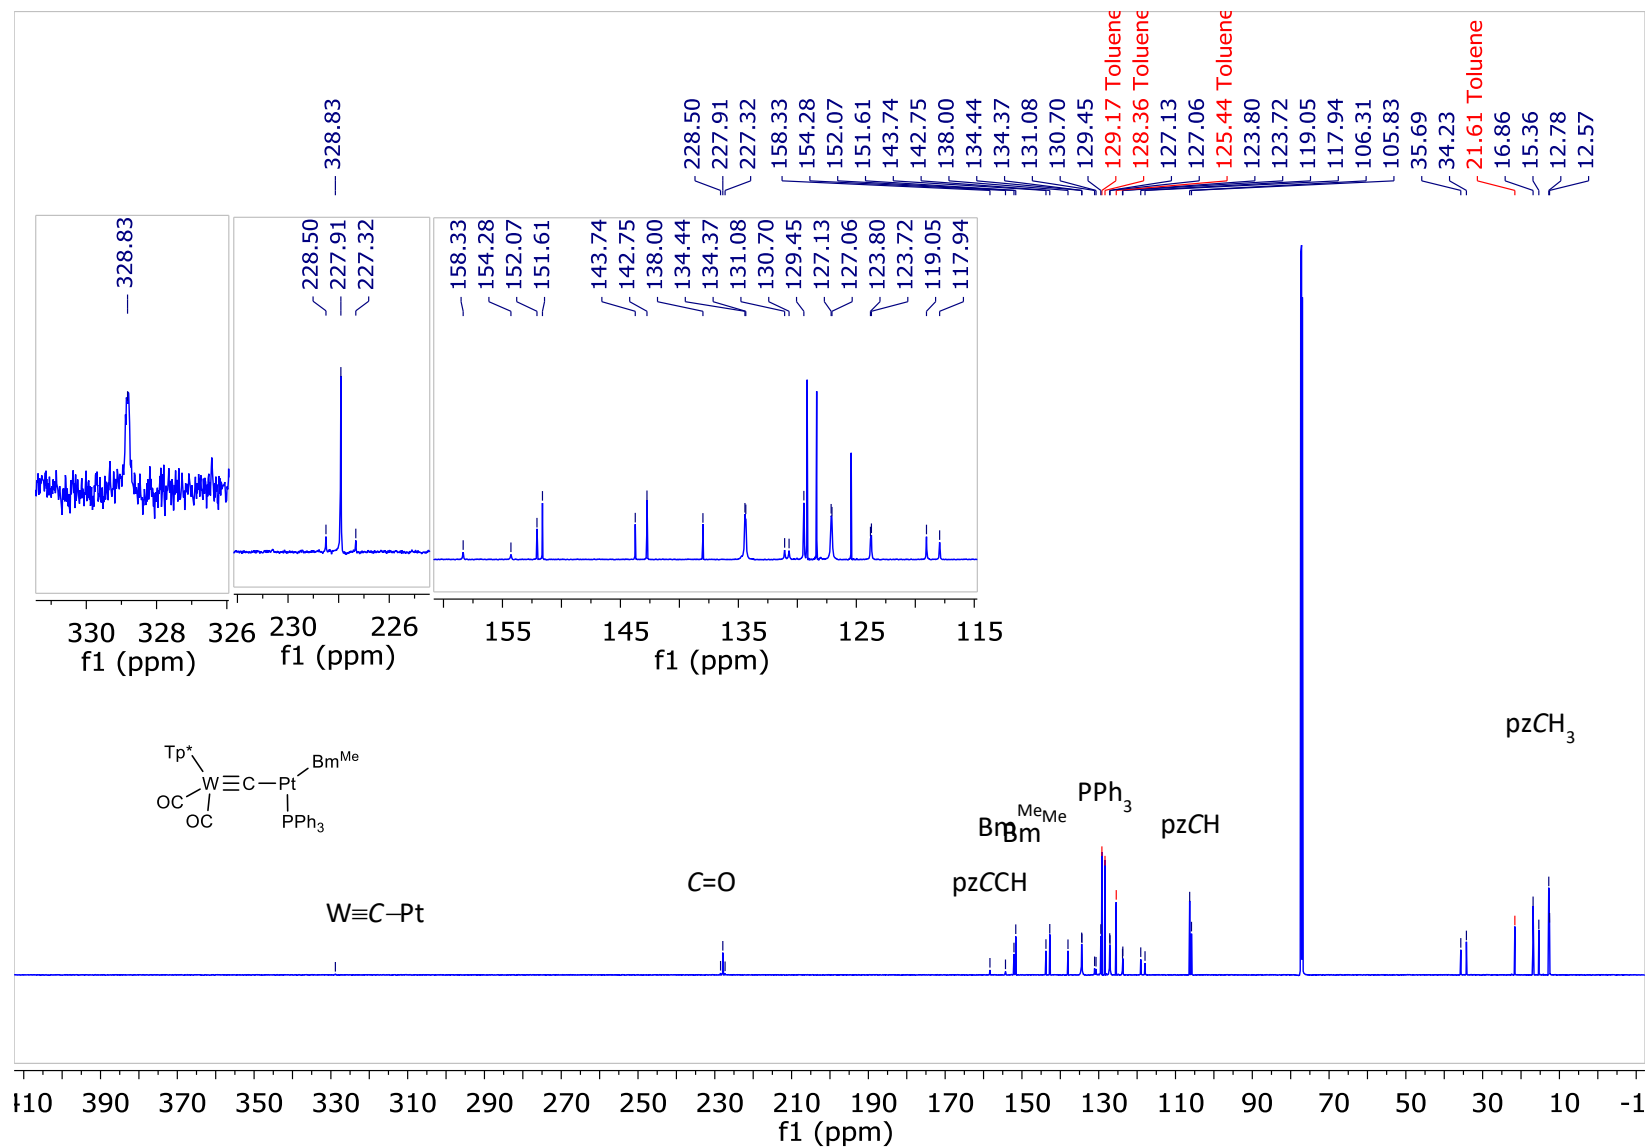

Figure S51:  $^{31}\text{P}\{^1\text{H}\}$  NMR Spectrum of (13)  $[(\text{Tp}^*)\text{W}\equiv\text{C}-\text{Pt}(\text{Bm}^{\text{Me}})(\text{PPh}_3)]$  (162 MHz,  $\text{CDCl}_3$ , 25 °C,  $\delta$ ):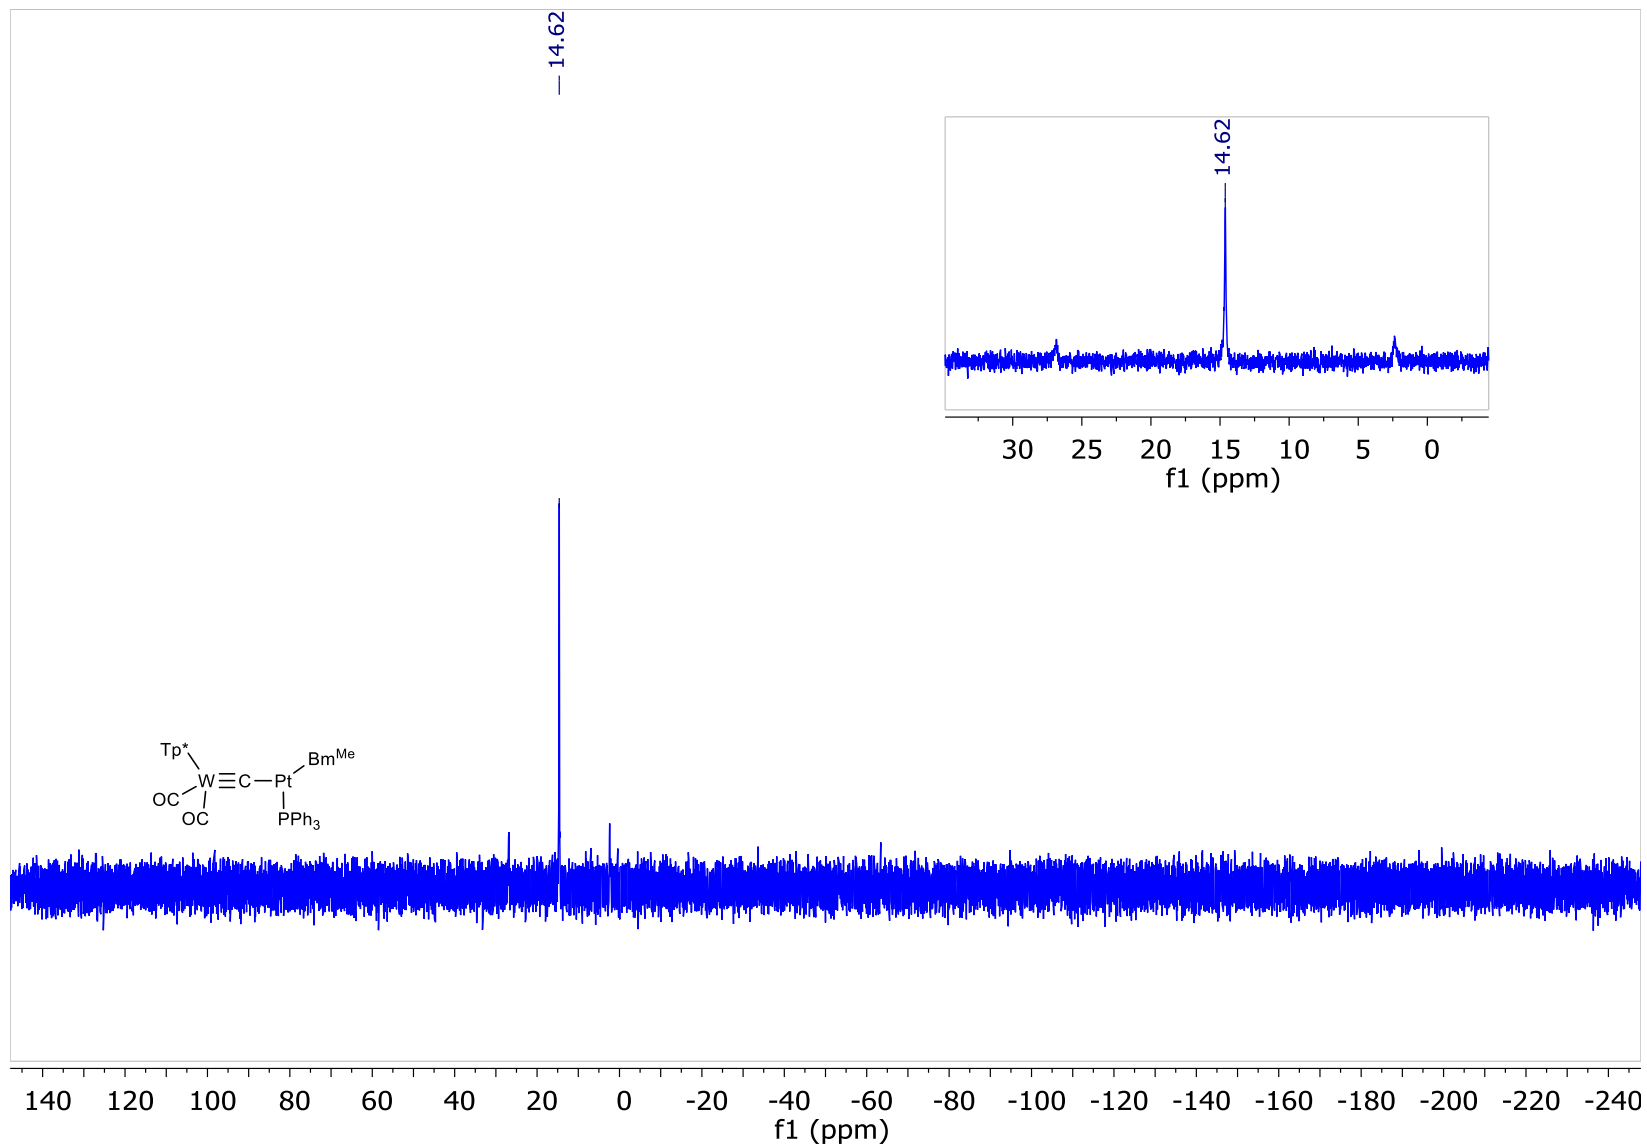

Figure S52:  $^{195}\text{Pt}\{^1\text{H}\}$  NMR Spectrum of (13)  $[(\text{Tp}^*)\text{W}\equiv\text{C}-\text{Pt}(\text{Bm}^{\text{Me}})(\text{PPh}_3)]$  (86 MHz,  $\text{CDCl}_3$ , 25 °C,  $\delta$ ):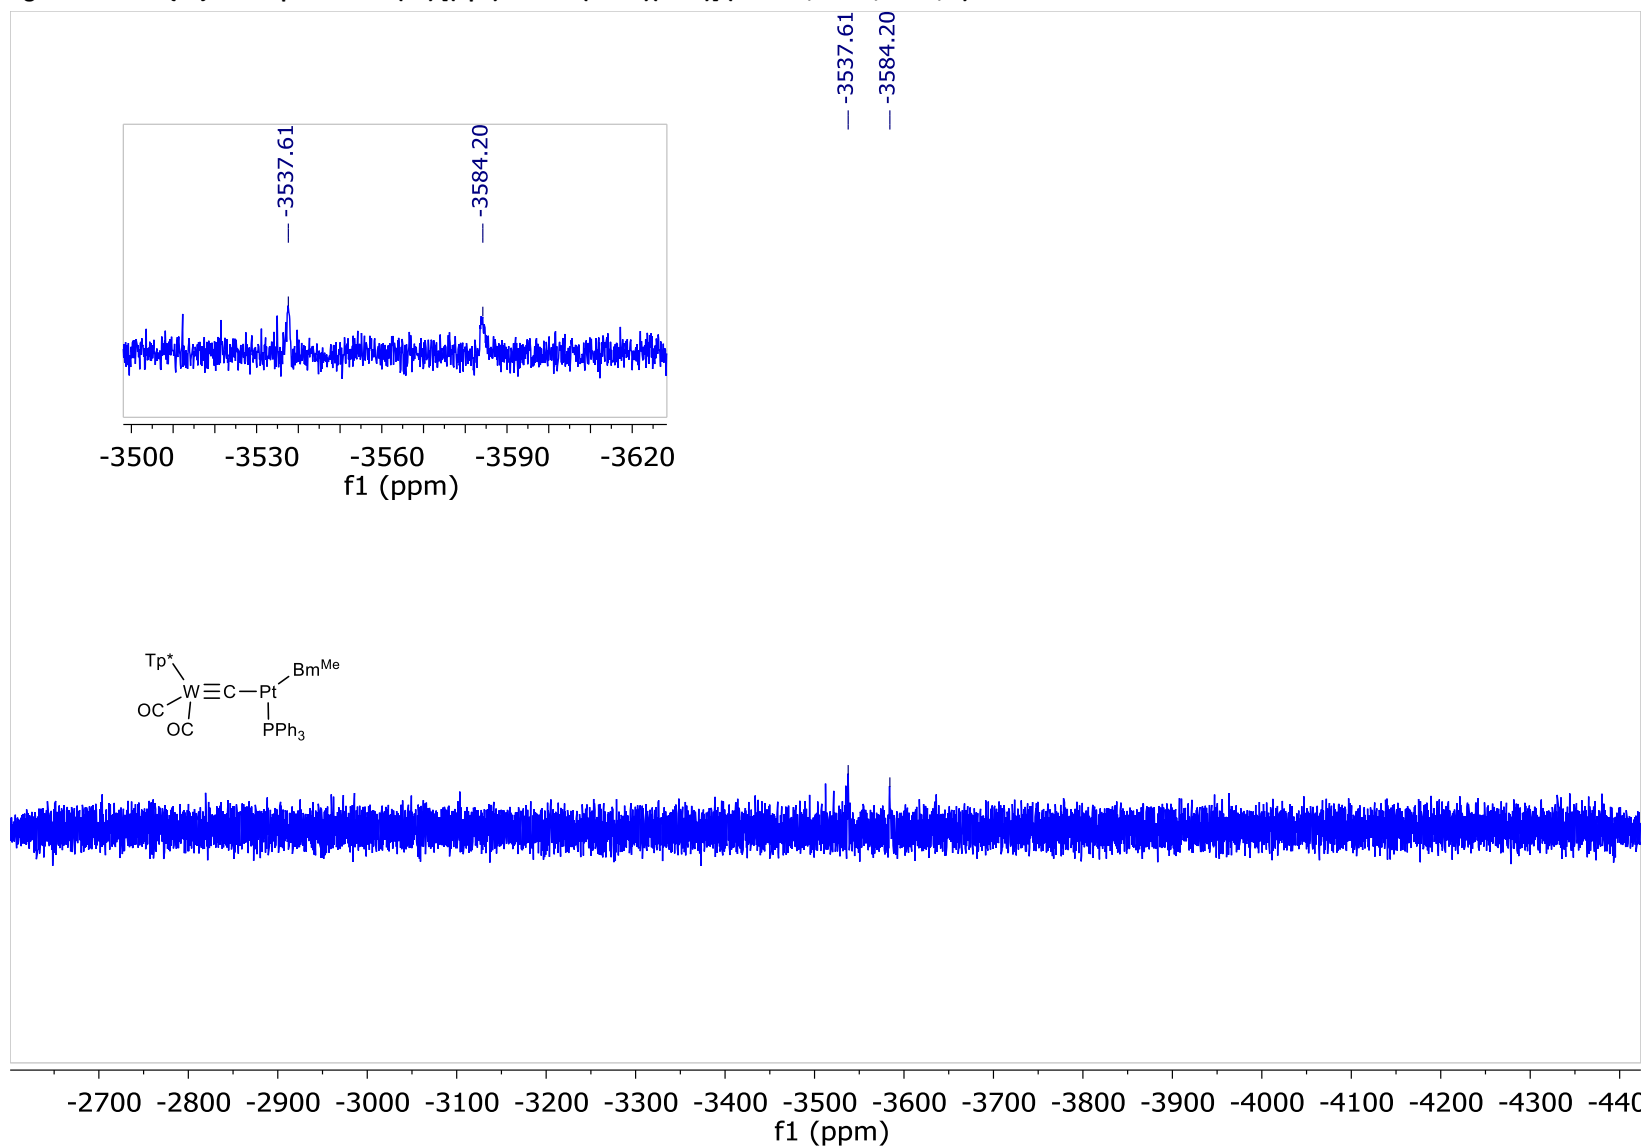

Figure S53: Infrared Spectrum of (13) [(Tp\*)W≡C-Pt(Bm<sup>Me</sup>)(PPh<sub>3</sub>)] (CH<sub>2</sub>Cl<sub>2</sub>, 25 °C, ν):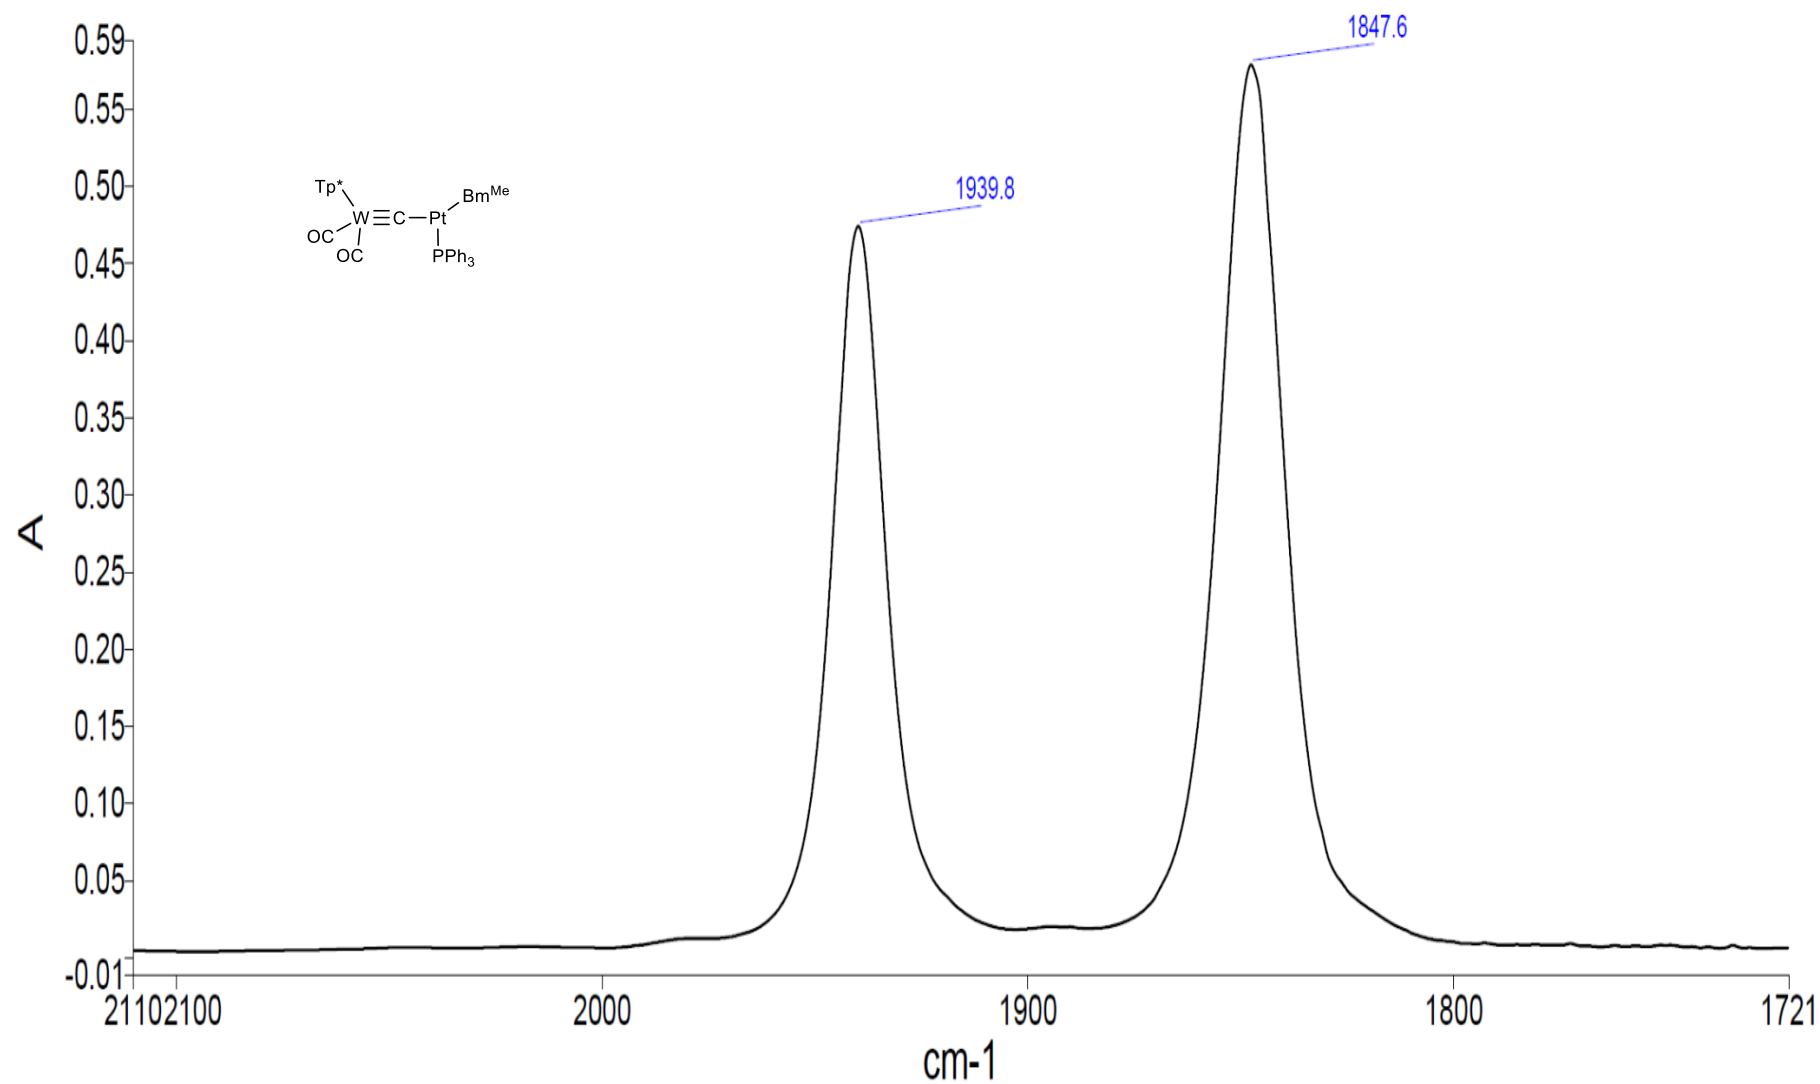

Figure S54: Mass Spectrum of (13)  $[(Tp^*)W\equiv C-Pt(Bm^{Me})(PPh_3)]$  (ESI):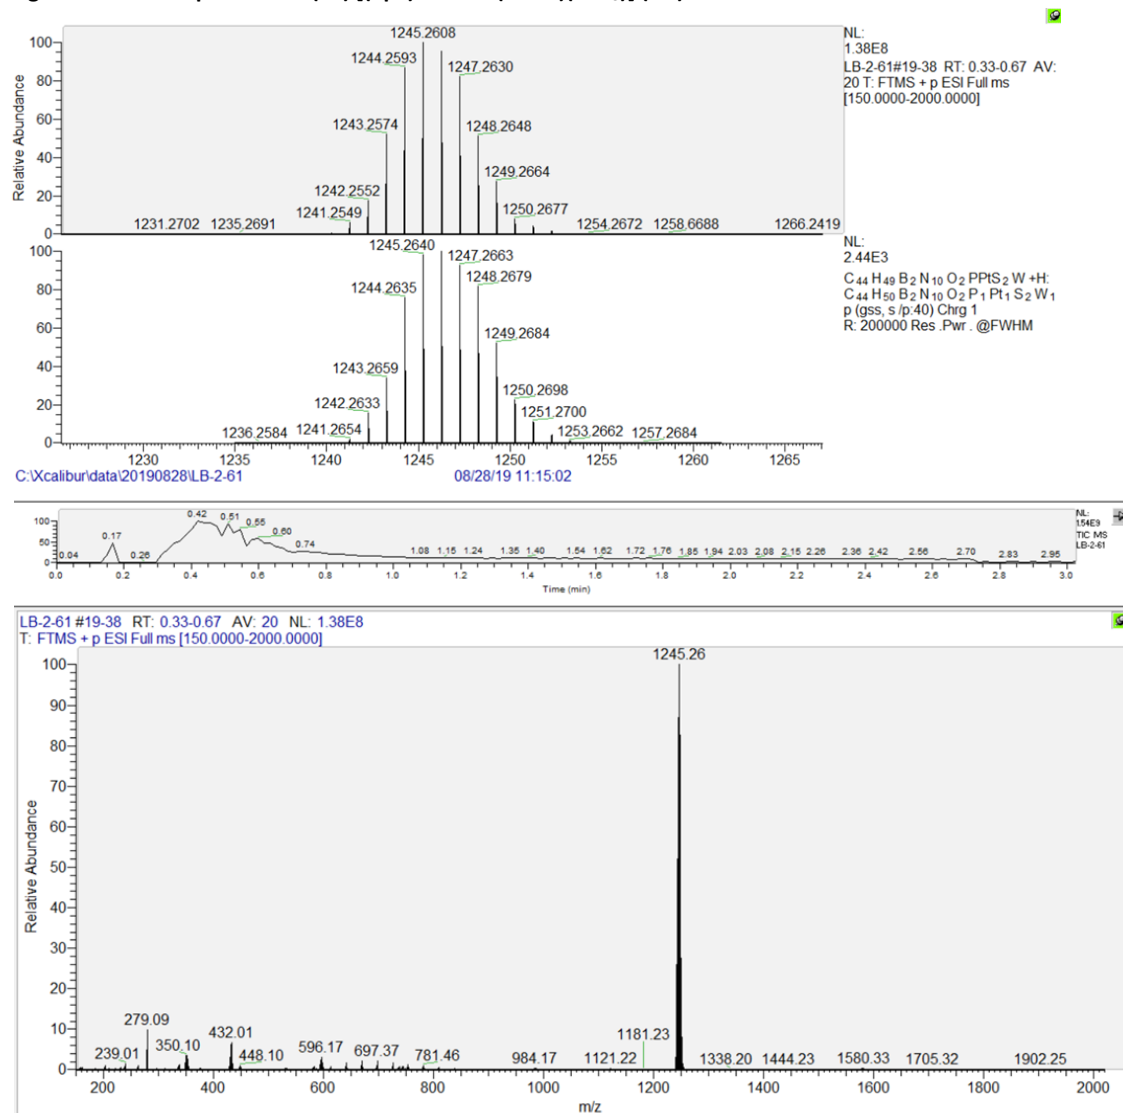

## SUPPORTING INFORMATION

### Computational Details

Computational studies were performed by using the *SPARTAN18* suite of programs.<sup>1</sup> Geometry optimisation (gas phase) was performed at the DFT level of theory using the exchange functional of Becke<sup>2</sup> for **1Cl**\* (for consistency with reference 6) and the  $\omega$ B97X-D functional of Head-Gordon<sup>3</sup> for **1Br**\*. The Los Alamos effective core potential type basis set (LANL2DZ) of Hay and Wadt<sup>4</sup> was used for Pt and W Pople 6-31G\* basis sets<sup>5</sup> were used for all other atoms. Frequency calculations were performed to confirm that the optimized structure was a minimum and also to identify vibrational modes of interest ( $\nu_{\text{WCPT}}$ ).

### [WPt( $\mu$ -C)Cl(CO)<sub>2</sub>(PMe<sub>3</sub>)<sub>2</sub>(Tp)] 1Cl\*

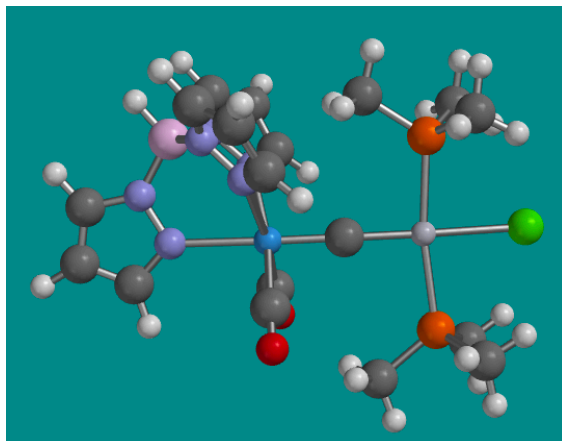

### Cartesian Coordinates

| Atom | x         | y         | z         |
|------|-----------|-----------|-----------|
| Pt   | 1.074876  | 2.352687  | 0.574721  |
| W    | -0.837563 | -0.471792 | -1.027986 |
| Cl   | 2.255928  | 4.242487  | 1.745010  |
| P    | 0.409132  | 3.995586  | -0.999227 |
| P    | 1.971817  | 0.988337  | 2.288612  |
| O    | -3.265457 | 1.541316  | -1.183212 |
| O    | 0.206362  | 0.451700  | -3.861932 |
| N    | -2.122251 | -2.229117 | -1.943237 |
| N    | -2.083203 | -3.468788 | -1.384095 |
| N    | -1.615553 | -1.460938 | 0.853115  |
| N    | -1.642091 | -2.813038 | 1.000142  |
| N    | 0.642527  | -2.173616 | -0.919559 |
| N    | 0.277683  | -3.421131 | -0.516254 |
| C    | 0.140352  | 0.902738  | -0.267504 |
| C    | -2.369575 | 0.792790  | -1.136801 |
| C    | -0.191160 | 0.112807  | -2.817375 |
| C    | -2.986768 | -2.294509 | -2.963307 |
| C    | -3.519514 | -3.586569 | -3.075623 |
| H    | -4.237440 | -3.948656 | -3.796456 |
| C    | -2.915947 | -4.298245 | -2.049553 |
| C    | -2.129482 | -0.938154 | 1.975931  |
| C    | -2.487757 | -1.956754 | 2.869674  |
| H    | -2.926207 | -1.854411 | 3.851190  |
| C    | -2.164559 | -3.131300 | 2.204806  |
| C    | 1.948900  | -2.228348 | -1.217387 |
| C    | 2.446585  | -3.520238 | -0.998077 |
| H    | 3.455273  | -3.876232 | -1.145665 |
| C    | 1.347935  | -4.244164 | -0.556809 |
| B    | -1.191333 | -3.744258 | -0.152050 |
| H    | -1.288455 | -4.892998 | 0.184653  |
| H    | -3.016739 | -5.330509 | -1.745804 |
| H    | -3.182082 | -1.414489 | -3.560637 |
| H    | -2.272231 | -4.166116 | 2.496096  |
| H    | -2.210765 | 0.135187  | 2.075633  |

| Atom | x         | y         | z         |
|------|-----------|-----------|-----------|
| H    | 1.247950  | -5.282871 | -0.276989 |
| C    | 1.658675  | -0.822486 | 2.298541  |
| H    | 0.585114  | -1.016229 | 2.344857  |
| H    | 2.153351  | -1.279186 | 3.162857  |
| H    | 2.041885  | -1.273616 | 1.380582  |
| C    | 1.422277  | 1.539335  | 3.956433  |
| H    | 0.344719  | 1.377169  | 4.053055  |
| H    | 1.627771  | 2.607855  | 4.054764  |
| H    | 1.942425  | 0.982469  | 4.744136  |
| C    | 3.808727  | 1.106875  | 2.345050  |
| H    | 4.091843  | 2.160016  | 2.410804  |
| H    | 4.225712  | 0.688140  | 1.424309  |
| H    | 4.206337  | 0.555683  | 3.204796  |
| C    | 1.888957  | 4.784379  | -1.756022 |
| H    | 1.598287  | 5.609432  | -2.415742 |
| H    | 2.433119  | 4.032227  | -2.335056 |
| H    | 2.537123  | 5.151615  | -0.957319 |
| C    | -0.645241 | 3.588267  | -2.449423 |
| H    | -1.605920 | 3.187709  | -2.119334 |
| H    | -0.157888 | 2.841479  | -3.079770 |
| H    | -0.818631 | 4.497934  | -3.035670 |
| C    | -0.503051 | 5.364624  | -0.176369 |
| H    | -1.470851 | 4.990609  | 0.171099  |
| H    | -0.664927 | 6.198021  | -0.868790 |
| H    | 0.079089  | 5.697285  | 0.685805  |
| H    | 2.451911  | -1.338001 | -1.567635 |

## SUPPORTING INFORMATION

## Dalton Transactions

**[WPt( $\mu$ -C)Br(CO)<sub>2</sub>(PMe<sub>3</sub>)<sub>2</sub>(Tp)] 1Br\***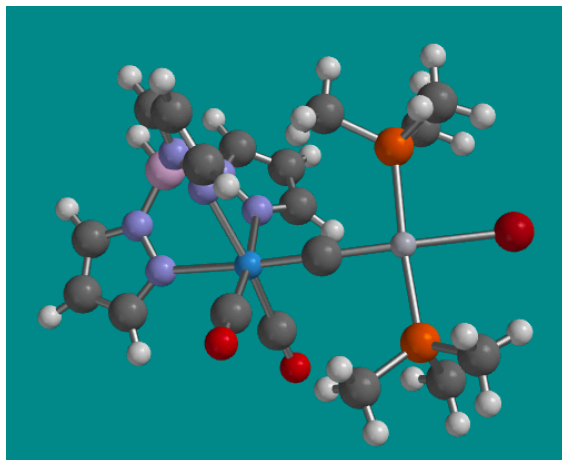

## Cartesian Coordinates

| Atom | x         | y         | z         |
|------|-----------|-----------|-----------|
| Pt   | 1.063511  | 2.322691  | 0.581614  |
| W    | -0.753007 | -0.417685 | -1.172536 |
| Br   | 1.843811  | 4.234028  | 2.165306  |
| P    | 0.426290  | 3.957386  | -0.975599 |
| P    | 1.915117  | 0.804784  | 2.167343  |
| O    | -2.970019 | 1.803661  | -1.317771 |
| O    | 0.254696  | 0.357730  | -4.053367 |
| N    | -2.184288 | -2.170256 | -1.813914 |
| N    | -2.164671 | -3.350010 | -1.155357 |
| N    | -1.456799 | -1.204244 | 0.819641  |
| N    | -1.514143 | -2.519892 | 1.113397  |
| N    | 0.609860  | -2.202975 | -1.053303 |
| N    | 0.241857  | -3.361741 | -0.466512 |
| C    | 0.274376  | 0.912374  | -0.456603 |
| C    | -2.170841 | 0.958376  | -1.276780 |
| C    | -0.131728 | 0.064175  | -2.998691 |
| C    | -3.104722 | -2.276633 | -2.770793 |
| C    | -3.697861 | -3.543405 | -2.740880 |
| H    | -4.471236 | -3.930484 | -3.385971 |
| C    | -3.065662 | -4.190573 | -1.694759 |
| C    | -1.814310 | -0.540971 | 1.920505  |
| C    | -2.103148 | -1.438712 | 2.953448  |
| H    | -2.424525 | -1.212327 | 3.958394  |
| C    | -1.901230 | -2.687123 | 2.390239  |
| C    | 1.875637  | -2.349114 | -1.446733 |
| C    | 2.346909  | -3.619874 | -1.104138 |
| H    | 3.324683  | -4.037499 | -1.287184 |
| C    | 1.268765  | -4.229175 | -0.486282 |
| B    | -1.205086 | -3.572941 | 0.028740  |
| H    | -1.333380 | -4.682792 | 0.477294  |
| H    | -3.190272 | -5.186213 | -1.294876 |
| H    | -3.291330 | -1.439474 | -3.428801 |
| H    | -2.010964 | -3.679860 | 2.801068  |
| H    | -1.832150 | 0.539930  | 1.905882  |
| H    | 1.154002  | -5.218146 | -0.067814 |
| C    | 1.864092  | -0.987540 | 1.823608  |
| H    | 0.832892  | -1.317694 | 1.692456  |
| H    | 2.322537  | -1.535150 | 2.653399  |
| H    | 2.406693  | -1.205467 | 0.901275  |
| C    | 1.136430  | 0.946580  | 3.814680  |
| H    | 0.099679  | 0.605926  | 3.750536  |

| Atom | x         | y         | z         |
|------|-----------|-----------|-----------|
| H    | 1.151615  | 1.993812  | 4.125764  |
| H    | 1.670403  | 0.331271  | 4.546251  |
| C    | 3.692089  | 1.109422  | 2.474846  |
| H    | 3.825961  | 2.145458  | 2.793741  |
| H    | 4.248187  | 0.956522  | 1.545806  |
| H    | 4.071540  | 0.426545  | 3.242174  |
| C    | 1.749045  | 5.179346  | -1.290284 |
| H    | 1.392787  | 5.954975  | -1.976213 |
| H    | 2.608853  | 4.670286  | -1.734653 |
| H    | 2.061393  | 5.626378  | -0.344496 |
| C    | -0.042152 | 3.433183  | -2.660068 |
| H    | -0.940921 | 2.816389  | -2.628734 |
| H    | 0.762604  | 2.842725  | -3.103451 |
| H    | -0.232294 | 4.314660  | -3.281034 |
| C    | -1.000529 | 4.940410  | -0.400460 |
| H    | -1.873624 | 4.286311  | -0.326735 |
| H    | -1.216990 | 5.756996  | -1.096943 |
| H    | -0.772803 | 5.345599  | 0.588755  |
| H    | 2.374370  | -1.529956 | -1.944431 |

## References

- 1 *Spartan18*<sup>®</sup> (2018) Wavefunction, Inc., 18401 Von Karman Ave., Suite 370 Irvine, CA 92612 U.S.A
- 2 (a) A. D. Becke, *J. Chem. Phys.*, 1993, **98**, 5648–5652. (b) P. J. Stephens, F. J. Devlin, C. F. Chabalowski and M. J. Frisch, *J. Phys. Chem.*, 1994, **98**, 11623–11627.
- 3 (a) J.-D. Chai and M. Head-Gordon, *J. Chem. Phys.*, 2008, **128**, 0841061–18410615. (b) J.-D. Chai and M. Head-Gordon, *Phys. Chem. Chem. Phys.*, 2008, **10**, 6615–6620.
- 4 (a) P. J. Hay and W.R. Wadt, *J. Chem. Phys.*, 1985, **82**, 270–283. (b) W. R. Wadt and P. J. Hay, *J. Chem. Phys.*, 1985, **82**, 284–298. (c) P. J. Hay, W. R. Wadt, *J. Chem. Phys.*, 1985, **82**, 299–310.
- 5 W. J. Hehre, R. Ditchfeld and J. A. Pople, *J. Chem. Phys.*, 1972, **56**, 2257–2261.
